# Supplementary material for: Product Distributions of Cytochrome P450 OleTJE with Phenyl-Substituted Fatty Acids: A Computational Study
Source: MDPI journal article supplement (doi:10.3390/ijms22137172), 2021-07-02
Supplement: s1 [file s1]

## Supporting Information

# Product distributions of cytochrome P450 OleT<sub>JE</sub> with phenyl-substituted fatty acids: A computational study

Yen-Ting Lin <sup>1,2</sup>, and Sam P. de Visser <sup>1,2\*</sup>

<sup>1</sup> Manchester Institute of Biotechnology, The University of Manchester, 131 Princess Street, Manchester M1 7DN, United Kingdom;  
[sam.devisser@manchester.ac.uk](mailto:sam.devisser@manchester.ac.uk)

<sup>2</sup> Department of Chemical Engineering and Analytical Science, The University of Manchester, Oxford Road, Manchester M13 9PL, United Kingdom;  
[sam.devisser@manchester.ac.uk](mailto:sam.devisser@manchester.ac.uk)

\* Correspondence: [sam.devisser@manchester.ac.uk](mailto:sam.devisser@manchester.ac.uk)

Tables with raw data:

## Model-S1 Data

**Table S1:** Absolute (free) energies (in au) of optimized geometries for the C<sup>alpha</sup> pathway of substrate (3-phenyl propionic acid or 3-phenylpropionate; S1) activation by P450 OleT<sub>JE</sub> model complex as calculated at the UB3LYP level of theory.

| System            | BS1 (Gas)        |                          |                       | BS2 + Solv                   |                            |                         |
|-------------------|------------------|--------------------------|-----------------------|------------------------------|----------------------------|-------------------------|
|                   | E <sub>BS1</sub> | E <sub>BS1</sub> + Δ ZPE | E <sub>BS1</sub> + ΔG | E <sub>BS2,solv</sub> + ΔZPE | E <sub>BS2,solv</sub> + ΔG | E <sub>BS2,solv,D</sub> |
| 4Re S1            | -3877.974275     | -3876.597295             | -3876.741086          | -3878.340896                 | -3878.484687               | -3879.945016            |
| 4TS1 HA,alpha,S1  | -3877.942710     | -3876.572609             | -3876.717415          | -3878.307673                 | -3878.452478               | -3879.908381            |
| 4IM1 alpha,S1     | -3877.959274     | -3876.585385             | -3876.732438          | -3878.339327                 | -3878.486379               | -3879.937812            |
| 4TS2 reb,alpha,S1 | -3877.953321     | -3876.578688             | -3876.722446          | -3878.313365                 | -3878.457123               | -3879.915478            |
| 4Pr OH,alpha,S1   | -3878.049251     | -3876.670304             | -3876.815636          | -3878.433358                 | -3878.578690               | -3880.044469            |
| 4TS2 DS,alpha,S1  | -3877.940821     | -3876.570083             | -3876.713843          | -3878.315851                 | -3878.459612               | -3879.915634            |
| 4Pr DS,alpha,S1   | -3877.959489     | -3876.586600             | -3876.731703          | -3878.348124                 | -3878.493227               | -3879.946542            |

**Table S2:** Relative (free) energies (kcal mol<sup>-1</sup>) of optimized geometries for the C<sup>alpha</sup> pathway of substrate (3-phenyl propionic acid or 3-phenylpropionate; S1) activation by P450 OleT<sub>JE</sub> model complex as calculated at the UB3LYP level of theory.

| System            | BS1 (Gas)         |                         |                       | BS2 + Solv                    |                            |                                |
|-------------------|-------------------|-------------------------|-----------------------|-------------------------------|----------------------------|--------------------------------|
|                   | ΔE <sub>BS1</sub> | ΔE <sub>BS1</sub> +ΔZPE | ΔE <sub>BS1</sub> +ΔG | ΔE <sub>BS2,Solv</sub> + ΔZPE | ΔE <sub>BS2,Solv</sub> +ΔG | ΔE <sub>BS2,Solv,D</sub> +ΔZPE |
| 4Re S1            | 0.00              | 0.00                    | 0.00                  | 0.00                          | 0.00                       | 0.00                           |
| 4TS1 HA,alpha,S1  | 19.81             | 15.49                   | 14.85                 | 20.85                         | 20.21                      | 22.99                          |
| 4IM1 alpha,S1     | 9.41              | 7.47                    | 5.43                  | 0.98                          | -1.06                      | 4.52                           |
| 4TS2 reb,alpha,S1 | 13.15             | 11.68                   | 11.70                 | 17.28                         | 17.30                      | 18.54                          |
| 4Pr OH,alpha,S1   | -47.05            | -45.81                  | -46.78                | -58.02                        | -58.99                     | -62.41                         |
| 4TS2 DS,alpha,S1  | 20.99             | 17.08                   | 17.10                 | 15.72                         | 15.73                      | 18.44                          |
| 4Pr DS,alpha,S1   | 9.28              | 6.71                    | 5.89                  | -4.54                         | -5.36                      | -0.96                          |

**Table S3:** Imaginary frequency (cm<sup>-1</sup>) of the transition state structures along the C<sup>alpha</sup> pathway of substrate (3-phenyl propionic acid or 3-phenylpropionate; S1) activation by P450 OleT<sub>JE</sub> model complex as calculated at the UB3LYP level of theory.

| System            | Imaginary Frequency (cm <sup>-1</sup> ) |
|-------------------|-----------------------------------------|
| 4TS1 HA,alpha,S1  | i1616.2                                 |
| 4TS2 reb,alpha,S1 | i468.9                                  |
| 4TS2 DS,alpha,S1  | i536.4                                  |

**Table S4:** Absolute (free) energies (in au) of optimized geometries for the C<sup>beta</sup> pathway of substrate (3-phenyl propionic acid or 3-phenylpropionate; S1) activation by P450 OleT<sub>JE</sub> model complex as calculated at the UB3LYP level of theory.

| System           | BS1 (Gas)        |                                 |                               | BS2 + Solv                           |                                    |                         |
|------------------|------------------|---------------------------------|-------------------------------|--------------------------------------|------------------------------------|-------------------------|
|                  | E <sub>BS1</sub> | E <sub>BS1</sub> + $\Delta$ ZPE | E <sub>BS1</sub> + $\Delta$ G | E <sub>BS2,solv</sub> + $\Delta$ ZPE | E <sub>BS2,solv</sub> + $\Delta$ G | E <sub>BS2,solv,D</sub> |
| 4TS1 HA,beta,S1  | -3877.944838     | -3876.573129                    | -3876.714153                  | -3878.317715                         | -3878.458740                       | -3879.921481            |
| 4IM1 beta,S1     | -3877.969688     | -3876.595489                    | -3876.741225                  | -3878.351745                         | -3878.497481                       | -3879.953849            |
| 4TS2 reb,beta,S1 | -3877.944322     | -3876.571254                    | -3876.717594                  | -3878.331400                         | -3878.477740                       | -3879.930088            |
| 4 Pr OH,beta,S1  | -3878.038420     | -3876.659600                    | -3876.805559                  | -3878.426672                         | -3878.572632                       | -3880.035190            |
| 4TS2 DS,beta,S1  | -3877.947519     | -3876.575138                    | -3876.717653                  | -3878.344918                         | -3878.487432                       | -3879.946595            |
| 4 Pr DS,beta,S1  | -3878.036924     | -3876.662647                    | -3876.808308                  | -3878.412305                         | -3878.557965                       | -3880.016536            |
| 4TS2 DC,beta,S1  | -3877.920836     | -3876.549187                    | -3876.696952                  | -3878.301141                         | -3878.448906                       | -3879.894080            |
| 4 Pr DC,beta,S1  | -3877.929266     | -3876.556712                    | -3876.704753                  | -3878.324456                         | -3878.472498                       | -3879.921720            |

**Table S5:** Relative (free) energies (kcal mol<sup>-1</sup>) of optimized geometries for the C<sup>beta</sup> pathway of substrate (3-phenyl propionic acid or 3-phenylpropionate; S1) activation by P450 OleT<sub>JE</sub> model complex as calculated at the UB3LYP level of theory.

| System           | BS1 (Gas)                 |                                          |                                        | BS2 + Solv                                    |                                             |                                                 |
|------------------|---------------------------|------------------------------------------|----------------------------------------|-----------------------------------------------|---------------------------------------------|-------------------------------------------------|
|                  | $\Delta$ E <sub>BS1</sub> | $\Delta$ E <sub>BS1</sub> + $\Delta$ ZPE | $\Delta$ E <sub>BS1</sub> + $\Delta$ G | $\Delta$ E <sub>BS2,solv</sub> + $\Delta$ ZPE | $\Delta$ E <sub>BS2,solv</sub> + $\Delta$ G | $\Delta$ E <sub>BS2,solv,D</sub> + $\Delta$ ZPE |
| 4TS1 HA,beta,S1  | 18.47                     | 15.16                                    | 16.90                                  | 14.55                                         | 16.28                                       | 11.46                                           |
| 4IM1 beta,S1     | 2.88                      | 1.13                                     | -0.09                                  | -6.81                                         | -8.03                                       | -7.29                                           |
| 4TS2 reb,beta,S1 | 18.80                     | 16.34                                    | 14.74                                  | 5.96                                          | 4.36                                        | 6.91                                            |
| 4 Pr OH,beta,S1  | -40.25                    | -39.10                                   | -40.46                                 | -53.83                                        | -55.19                                      | -55.43                                          |
| 4TS2 DS,beta,S1  | 16.79                     | 13.90                                    | 14.70                                  | -2.52                                         | -1.72                                       | -3.88                                           |
| 4 Pr DS,beta,S1  | -39.31                    | -41.01                                   | -42.18                                 | -44.81                                        | -45.98                                      | -46.58                                          |
| 4TS2 DC,beta,S1  | 33.53                     | 30.19                                    | 27.69                                  | 24.95                                         | 22.45                                       | 28.62                                           |
| 4 Pr DC,beta,S1  | 28.24                     | 25.47                                    | 22.80                                  | 10.32                                         | 7.65                                        | 11.84                                           |

**Table S6:** Imaginary frequency (cm<sup>-1</sup>) of the transition state structure along the C<sup>beta</sup> pathway of substrate (3-phenyl propionic acid or 3-phenylpropionate; S1) activation by P450 OleT<sub>JE</sub> model complex as calculated at the UB3LYP level of theory.

| System           | Imaginary Frequency (cm <sup>-1</sup> ) |
|------------------|-----------------------------------------|
| 4TS1 HA,beta,S1  | i1669.8                                 |
| 4TS2 reb,beta,S1 | i238.7                                  |
| 4TS2 DS,beta,S1  | i90.3                                   |
| 4TS2 DC,beta,S1  | i137.4                                  |

## Model-S2 Data

**Table S7:** Absolute (free) energies (in au) of optimized geometries for the C<sup>alpha</sup> pathway of substrate (2-phenyl butanoic acid or 2-phenylbutyrate; S2) activation by P450 OleT<sub>JE</sub> model complex as calculated at the UB3LYP level of theory.

| System            | BS1 (Gas)        |                                 |                               | BS2 + Solv                           |                                    |                         |
|-------------------|------------------|---------------------------------|-------------------------------|--------------------------------------|------------------------------------|-------------------------|
|                   | E <sub>BS1</sub> | E <sub>BS1</sub> + $\Delta$ ZPE | E <sub>BS1</sub> + $\Delta$ G | E <sub>BS2,solv</sub> + $\Delta$ ZPE | E <sub>BS2,solv</sub> + $\Delta$ G | E <sub>BS2,solv,D</sub> |
| 4Re S2            | -3917.263509     | -3915.858953                    | -3916.012330                  | -3917.630220                         | -3917.783597                       | -3919.263180            |
| 4 TS1 alpha,HA,S2 | -3917.244045     | -3915.844463                    | -3915.985709                  | -3917.602961                         | -3917.744207                       | -3919.238963            |
| 4IM1 alpha,S2     | -3917.289342     | -3915.884809                    | -3916.029864                  | -3917.651933                         | -3917.796988                       | -3919.299615            |
| 4Pr OH,alpha,S2   | -3917.350466     | -3915.943745                    | -3916.088360                  | -3917.719302                         | -3917.863917                       | -3919.364650            |
| 4Pr DS,alpha,S2   | -3917.345164     | -3915.942047                    | -3916.091062                  | -3917.722218                         | -3917.871233                       | -3919.350859            |

**Table S8:** Relative (free) energies (kcal mol<sup>-1</sup>) of optimized geometries for the C<sup>alpha</sup> pathway of substrate (2-phenyl butanoic acid or 2-phenylbutyrate; S2) activation by P450 OleT<sub>JE</sub> model complex as calculated at the UB3LYP level of theory.

| System            | BS1 (Gas)                 |                                          |                                        | BS2 + Solv                                    |                                             |                                                 |
|-------------------|---------------------------|------------------------------------------|----------------------------------------|-----------------------------------------------|---------------------------------------------|-------------------------------------------------|
|                   | $\Delta$ E <sub>BS1</sub> | $\Delta$ E <sub>BS1</sub> + $\Delta$ ZPE | $\Delta$ E <sub>BS1</sub> + $\Delta$ G | $\Delta$ E <sub>BS2,solv</sub> + $\Delta$ ZPE | $\Delta$ E <sub>BS2,solv</sub> + $\Delta$ G | $\Delta$ E <sub>BS2,solv,D</sub> + $\Delta$ ZPE |
| 4Re S2            | 0.00                      | 0.00                                     | 0.00                                   | 0.00                                          | 0.00                                        | 0.00                                            |
| 4 TS1 alpha,HA,S2 | 12.21                     | 9.09                                     | 16.70                                  | 17.11                                         | 24.72                                       | 12.08                                           |
| 4IM1 alpha,S2     | -16.21                    | -16.22                                   | -11.00                                 | -13.63                                        | -8.40                                       | -22.88                                          |
| 4Pr OH,alpha,S2   | -54.57                    | -53.21                                   | -47.71                                 | -55.90                                        | -50.40                                      | -62.31                                          |
| 4Pr DS,alpha,S2   | -51.24                    | -52.14                                   | -49.41                                 | -57.73                                        | -54.99                                      | -55.92                                          |

**Table S9:** Imaginary frequency (cm<sup>-1</sup>) of the transition state structure along the C<sup>alpha</sup> pathway of substrate (2-phenyl butanoic acid or 2-phenylbutyrate; S2) activation by P450 OleT<sub>JE</sub> model complex as calculated at the UB3LYP level of theory.

| System            | Imaginary Frequency (cm <sup>-1</sup> ) |
|-------------------|-----------------------------------------|
| 4 TS1 alpha,HA,S2 | i1751.1                                 |
| 4TS2 reb,alpha,S2 | i255.5                                  |

**Table S10:** Absolute (free) energies (in au) of optimized geometries for the C<sup>beta</sup> pathway of substrate (2-phenyl butanoic acid or 2-phenylbutyrate; S2) activation by P450 OleT<sub>JE</sub> model complex as calculated at the UB3LYP level of theory.

| System                  | BS1 (Gas)        |                                 |                               | BS2 + Solv                           |                                    |                         |
|-------------------------|------------------|---------------------------------|-------------------------------|--------------------------------------|------------------------------------|-------------------------|
|                         | E <sub>BS1</sub> | E <sub>BS1</sub> + $\Delta$ ZPE | E <sub>BS1</sub> + $\Delta$ G | E <sub>BS2,solv</sub> + $\Delta$ ZPE | E <sub>BS2,solv</sub> + $\Delta$ G | E <sub>BS2,Solv,D</sub> |
| <b>4 TS1 beta,HA,S2</b> | -3917.237998     | -3915.839318                    | -3915.984011                  | -3917.603225                         | -3917.747918                       | -3919.233626            |
| <b>4IM1 beta,S2</b>     | -3917.243933     | -3915.842263                    | -3915.991032                  | -3917.624343                         | -3917.773111                       | -3919.259034            |
| <b>4 TS2 beta,DS,S2</b> | -3917.253023     | -3915.853885                    | -3915.995392                  | -3917.619387                         | -3917.760894                       | -3919.246726            |
| <b>4 Pr beta,DS,S2</b>  | -3917.348966     | -3915.946350                    | -3916.096040                  | -3917.722386                         | -3917.872076                       | -3919.341592            |
| <b>4 TS2 beta,DC,S2</b> | -3917.212883     | -3915.813121                    | -3915.961915                  | -3917.594996                         | -3917.743790                       | -3919.224620            |
| <b>4 Pr beta,DC,S2</b>  | -3917.236538     | -3915.835067                    | -3915.986775                  | -3917.615976                         | -3917.767684                       | -3919.253117            |

**Table S11:** Relative (free) energies (kcal mol<sup>-1</sup>) of optimized geometries for the C<sup>beta</sup> pathway of substrate (2-phenyl butanoic acid or 2-phenylbutyrate; S2) activation by P450 OleT<sub>JE</sub> model complex as calculated at the UB3LYP level of theory.

| System                  | BS1 (Gas)                 |                                          |                                        | BS2 + Solv                                    |                                             |                                                 |
|-------------------------|---------------------------|------------------------------------------|----------------------------------------|-----------------------------------------------|---------------------------------------------|-------------------------------------------------|
|                         | $\Delta$ E <sub>BS1</sub> | $\Delta$ E <sub>BS1</sub> + $\Delta$ ZPE | $\Delta$ E <sub>BS1</sub> + $\Delta$ G | $\Delta$ E <sub>BS2,Solv</sub> + $\Delta$ ZPE | $\Delta$ E <sub>BS2,Solv</sub> + $\Delta$ G | $\Delta$ E <sub>BS2,Solv,D</sub> + $\Delta$ ZPE |
| <b>4 TS1 beta,HA,S2</b> | 16.01                     | 12.32                                    | 17.77                                  | 16.94                                         | 22.39                                       | 14.86                                           |
| <b>4IM1 beta,S2</b>     | 12.28                     | 10.47                                    | 13.36                                  | 3.69                                          | 6.58                                        | 0.79                                            |
| <b>4 TS2 beta,DS,S2</b> | 6.58                      | 3.18                                     | 10.63                                  | 6.80                                          | 14.25                                       | 6.93                                            |
| <b>4 Pr beta,DS,S2</b>  | -53.62                    | -54.84                                   | -52.53                                 | -57.83                                        | -55.52                                      | -50.42                                          |
| <b>4 TS2 beta,DC,S2</b> | 31.77                     | 28.76                                    | 31.64                                  | 22.10                                         | 24.98                                       | 21.19                                           |
| <b>4 Pr beta,DC,S2</b>  | 16.92                     | 14.99                                    | 16.04                                  | 8.94                                          | 9.99                                        | 4.38                                            |

**Table S12:** Imaginary frequency (cm<sup>-1</sup>) of the transition state structure along the C<sup>beta</sup> pathway of substrate (2-phenyl butanoic acid or 2-phenylbutyrate; S2) activation by P450 OleT<sub>JE</sub> model complex as calculated at the UB3LYP level of theory.

| System                  | Imaginary Frequency (cm <sup>-1</sup> ) |
|-------------------------|-----------------------------------------|
| <b>4 TS1 beta,HA,S2</b> | i1579.2                                 |
| <b>4 TS2 beta,DS,S2</b> | i330.5                                  |
| <b>4 TS2 beta,DC,S2</b> | i291.3                                  |

**Table S13:** Absolute (free) energies (in au) of optimized geometries for the C<sup>gamma</sup> pathway of substrate (2-phenyl butanoic acid or 2-phenylbutyrate; S2) activation by P450 OleT<sub>JE</sub> model complex as calculated at the UB3LYP level of theory.

| System                 | BS1 (Gas)        |                                 |                               | BS2 + Solv                           |                                    |                         |
|------------------------|------------------|---------------------------------|-------------------------------|--------------------------------------|------------------------------------|-------------------------|
|                        | E <sub>BS1</sub> | E <sub>BS1</sub> + $\Delta$ ZPE | E <sub>BS1</sub> + $\Delta$ G | E <sub>BS2,solv</sub> + $\Delta$ ZPE | E <sub>BS2,solv</sub> + $\Delta$ G | E <sub>BS2,solv,D</sub> |
| 4 TS gamma,HA,S2       | -3917.228455     | -3915.831381                    | -3915.976709                  | -3917.572820                         | -3917.718149                       | -3919.204583            |
| 4IM1 gamma,HA,S2       | -3917.236897     | -3915.836426                    | -3915.984758                  | -3917.612439                         | -3917.760772                       | -3919.244989            |
| 4 TS2 gamma,rebound,S2 | -3917.236733     | -3915.836137                    | -3915.981611                  | -3917.604033                         | -3917.749507                       | -3919.234605            |
| 4Pr gamma,OH,S2        | -3917.330842     | -3915.923650                    | -3916.073405                  | -3917.701976                         | -3917.851731                       | -3919.341084            |
| 4 TS2 gamma,DS,S2      | -3917.209908     | -3915.814808                    | -3915.959304                  | -3917.568507                         | -3917.713003                       | -3919.201675            |
| 4Pr gamma,DS,S2        | -3917.319246     | -3915.916746                    | -3916.066287                  | -3917.694932                         | -3917.844473                       | -3919.331547            |

**Table S14:** Relative (free) energies (kcal mol<sup>-1</sup>) of optimized geometries for the C<sup>gamma</sup> pathway of substrate (2-phenyl butanoic acid or 2-phenylbutyrate; S2) activation by P450 OleT<sub>JE</sub> model complex as calculated at the UB3LYP level of theory.

| System                 | BS1 (Gas)                 |                                          |                                        | BS2 + Solv                                    |                                             |                                                 |
|------------------------|---------------------------|------------------------------------------|----------------------------------------|-----------------------------------------------|---------------------------------------------|-------------------------------------------------|
|                        | $\Delta$ E <sub>BS1</sub> | $\Delta$ E <sub>BS1</sub> + $\Delta$ ZPE | $\Delta$ E <sub>BS1</sub> + $\Delta$ G | $\Delta$ E <sub>BS2,solv</sub> + $\Delta$ ZPE | $\Delta$ E <sub>BS2,solv</sub> + $\Delta$ G | $\Delta$ E <sub>BS2,solv,D</sub> + $\Delta$ ZPE |
| 4 TS gamma,HA,S2       | 22.00                     | 17.30                                    | 22.35                                  | 36.02                                         | 41.07                                       | 32.07                                           |
| 4IM1 gamma,HA,S2       | 16.70                     | 14.14                                    | 17.30                                  | 11.16                                         | 14.32                                       | 8.85                                            |
| 4 TS2 gamma,rebound,S2 | 16.80                     | 14.32                                    | 19.28                                  | 16.43                                         | 21.39                                       | 15.45                                           |
| 4Pr gamma,OH,S2        | -42.25                    | -40.60                                   | -38.33                                 | -45.03                                        | -42.75                                      | -47.23                                          |
| 4 TS2 gamma,DS,S2      | 33.63                     | 27.70                                    | 33.27                                  | 38.73                                         | 44.30                                       | 32.66                                           |
| 4Pr gamma,DS,S2        | -34.98                    | -36.27                                   | -33.86                                 | -40.61                                        | -38.20                                      | -44.19                                          |

**Table S15:** Imaginary frequency (cm<sup>-1</sup>) of the transition state structure along the C<sup>gamma</sup> pathway of substrate (2-phenyl butanoic acid or 2-phenylbutyrate; S2) activation by P450 OleT<sub>JE</sub> model complex as calculated at the UB3LYP level of theory.

| System            | Imaginary Frequency (cm <sup>-1</sup> ) |
|-------------------|-----------------------------------------|
| 4 TS gamma,HA,S2  | i1420.9                                 |
| 4 TS2 gamma,DS,S2 | i1629.8                                 |

## BDE- Model S1

**Table S16:** Absolute (free) energies (in au) of optimized geometries of substrate (3-phenyl propionic acid or 3-phenylpropionate; S1) and substrate fragments as calculated at the UB3LYP level of theory. Substrate\_S1\_alpha stands for substrate with a hydrogen atom removed from the C<sup>α</sup>–H position, which is a radical, while Substrate\_S1\_beta has the radical on the C<sup>β</sup> carbon atom.

| System             | BS1 (Gas)        |                         |                       | BS2 + Solv                   |                            |                         |
|--------------------|------------------|-------------------------|-----------------------|------------------------------|----------------------------|-------------------------|
|                    | E <sub>BS1</sub> | E <sub>BS1</sub> + ΔZPE | E <sub>BS1</sub> + ΔG | E <sub>BS2,solv</sub> + ΔZPE | E <sub>BS2,solv</sub> + ΔG | E <sub>BS2,Solv,D</sub> |
| Substrate_S1       | -498.7460898     | -498.585962             | -498.621987           | -499.117010                  | -498.956882                | -498.992908             |
| H atom             | -0.500273        | -0.500273               | -0.510927             | -0.502279                    | -0.502279                  | -0.512933               |
| Substrate_S1_alpha | -498.0897466     | -497.943491             | -497.979909           | -498.459970                  | -498.313714                | -498.350132             |
| Substrate_S1_beta  | -498.1041851     | -497.957793             | -497.994336           | -498.472246                  | -498.325854                | -498.362397             |

**Table S17:** Bond Dissociation Energy (BDE) and bond dissociation free energy (BDFE) values (kcal mol<sup>-1</sup>) of optimized geometries of substrate (3-phenyl propionic acid or 3-phenylpropionate; S1) by removal of a hydrogen atom from specific C–H bonds in the substrate and as calculated at the UB3LYP level of theory.

| System      | BDE <sub>BS1</sub> | BDE <sub>BS2</sub> + ΔZPE | BDFE <sub>BS2</sub> |
|-------------|--------------------|---------------------------|---------------------|
| CH,S1,alpha | 97.9               | 88.4                      | 81.5                |
| CH,S1,beta  | 88.9               | 80.8                      | 73.8                |

## BDE- Model S2

**Table S18:** Absolute (free) energies (in au) of optimized geometries of substrate (2-phenyl butanoic acid or 2-phenylbutyrate; S2) and substrate fragments as calculated at the UB3LYP level of theory. Substrate\_S2\_alpha stands for substrate with a hydrogen atom removed from the C<sup>α</sup>–H position, which is a radical.

| System             | BS1 (Gas)        |                         |                       |                              | BS2 + Solv                 |                         |
|--------------------|------------------|-------------------------|-----------------------|------------------------------|----------------------------|-------------------------|
|                    | E <sub>BS1</sub> | E <sub>BS1</sub> + ΔZPE | E <sub>BS1</sub> + ΔG | E <sub>BS2,solv</sub> + ΔZPE | E <sub>BS2,solv</sub> + ΔG | E <sub>BS2,Solv,D</sub> |
| Substrate_S2       | -538.0495606     |                         |                       |                              |                            |                         |
|                    |                  | -537.860968             | -537.898569           | -538.4363631                 | -538.2477701               | -538.2853721            |
| H atom             |                  |                         |                       |                              |                            |                         |
|                    | -0.500273        | -0.500273               | -0.510927             | -0.50227909                  | -0.502279                  | -0.512933               |
| Substrate_S2_alpha | -537.4147507     | -537.239307             | -537.27731            | -537.7966863                 | -537.6212433               | -537.6592453            |
| Substrate_S2_beta  | -537.3882572     | -537.214491             | -537.253159           | -537.7742641                 | -537.6004981               | -537.6391661            |
| Substrate_S2       | -537.3788463     | -537.205609             | -537.24415            | -537.7661333                 | -537.5928963               | -537.6314363            |

**Table S19:** Bond Dissociation Energy (BDE) and bond dissociation free energy (BDFE) values (kcal mol<sup>-1</sup>) of optimized geometries of substrate (2-phenyl butanoic acid or 2-phenylbutyrate; S2) by removal of a hydrogen atom from specific C–H bonds in the substrate and as calculated at the UB3LYP level of theory.

| System      | BDE <sub>BS1</sub> | BDE <sub>BS2</sub> + ΔZPE | BDFE <sub>BS2</sub> |
|-------------|--------------------|---------------------------|---------------------|
| CH,S2,alpha | 84.4               | 78.0                      | 71.0                |
| CH,S2,beta  | 101.0              | 91.0                      | 83.6                |
| CH,S2,gamma | 107.0              | 95.8                      | 88.5                |



## Model-S1- Charges and Spin state

**Table S20:** Group charges of optimized geometries for the C<sup>alpha</sup> pathway of substrate (3-phenyl propionic acid or 3-phenylpropionate; S1) activation by a P450 OleT<sub>JE</sub> model complex as calculated at the UB3LYP level of theory.

| System                 |     | Fe  | O    | Substrate | Amino Acids | Total |
|------------------------|-----|-----|------|-----------|-------------|-------|
| 4Re S1                 | Gas | 0.5 | -0.4 | -0.6      | 0.5         | 0.0   |
| 4TS1<br>HA, alpha, S1  | Gas | 0.5 | -0.5 | -0.4      | 0.5         | 0.0   |
| 4IM1 alpha, S1         | Gas | 0.4 | -0.6 | -0.3      | 0.5         | 0.0   |
| 4TS2<br>reb, alpha, S1 | Gas | 0.5 | -0.6 | -0.1      | 0.3         | 0.0   |
| 4Pr OH, alpha, S1      | Gas | 0.6 | -0.6 | 0.1       | 0.0         | 0.0   |
| 4TS2<br>DS, alpha, S1  | Gas | 0.6 | -0.7 | 0.0       | 0.2         | 0.0   |
| 4Pr DS, alpha, S1      | Gas | 0.4 | -0.7 | 0.2       | 0.1         | 0.0   |

**Table S21:** Group spin densities of optimized geometries for the C<sup>alpha</sup> pathway of substrate (3-phenyl propionic acid or 3-phenylpropionate; S1) activation by a P450 OleT<sub>JE</sub> model complex as calculated at the UB3LYP level of theory.

| System                 |     | Fe  | O   | Substrate | Amino Acids | Total |
|------------------------|-----|-----|-----|-----------|-------------|-------|
| 4Re S1                 | Gas | 1.1 | 0.9 | 0.0       | 1.0         | 3.0   |
| 4TS1<br>HA, alpha, S1  | Gas | 0.9 | 0.6 | 0.5       | 0.9         | 3.0   |
| 4IM1 alpha, S1         | Gas | 0.9 | 0.2 | 1.0       | 1.0         | 3.0   |
| 4TS2<br>reb, alpha, S1 | Gas | 2.2 | 0.0 | 0.8       | 0.1         | 3.0   |
| 4Pr OH, alpha, S1      | Gas | 2.6 | 0.0 | 0.0       | 0.4         | 3.0   |
| 4TS2<br>DS, alpha, S1  | Gas | 3.0 | 0.0 | 0.0       | 0.0         | 3.0   |
| 4Pr DS, alpha, S1      | Gas | 1.1 | 0.0 | 2.0       | -0.1        | 3.0   |

**Table S22:** Group charges of optimized geometries for the C<sup>beta</sup> pathway of substrate (3-phenyl propionic acid or 3-phenylpropionate; S1) activation by a P450 OleT<sub>JE</sub> model complex as calculated at the UB3LYP level of theory.

| System              |     | Fe  | O    | Substrate | Amino Acids | Total |
|---------------------|-----|-----|------|-----------|-------------|-------|
| 4TS1<br>HA,beta,S1  | Gas | 0.5 | -0.5 | -0.3      | 0.4         | 0.0   |
| 4IM1 beta,S1        | Gas | 0.5 | -0.6 | -0.3      | 0.4         | 0.0   |
| 4TS2<br>reb,beta,S1 | Gas | 0.5 | -0.6 | -0.1      | 0.2         | 0.0   |
| 4 Pr<br>OH,beta,S1  | Gas | 0.5 | -0.6 | 0.0       | 0.1         | 0.0   |
| 4TS2<br>DS,beta,S1  | Gas | 0.5 | -0.6 | -0.1      | 0.2         | 0.0   |
| 4 Pr<br>DS,beta,S1  | Gas | 0.6 | -0.7 | 0.2       | 0.0         | 0.0   |
| 4TS2<br>DC,beta,S1  | Gas | 0.5 | -0.6 | -0.3      | 0.4         | 0.0   |
| 4 Pr<br>DC,beta,S1  | Gas | 0.5 | -0.6 | -0.3      | 0.4         | 0.0   |

**Table S23:** Group spin densities of optimized geometries for the C<sup>beta</sup> pathway of substrate (3-phenyl propionic acid or 3-phenylpropionate; S1) activation by a P450 OleT<sub>JE</sub> model complex as calculated at the UB3LYP level of theory.

| System              |     | Fe  | O   | Substrate | Amino Acids | Total |
|---------------------|-----|-----|-----|-----------|-------------|-------|
| 4TS1<br>HA,beta,S1  | Gas | 1.3 | 0.7 | 0.5       | 0.5         | 3.0   |
| 4IM1 beta,S1        | Gas | 1.9 | 0.3 | 1.0       | -0.1        | 3.0   |
| 4TS2<br>reb,beta,S1 | Gas | 2.4 | 0.0 | 0.8       | -0.1        | 3.0   |
| 4 Pr<br>OH,beta,S1  | Gas | 2.5 | 0.0 | 0.0       | 0.5         | 3.0   |
| 4TS2<br>DS,beta,S1  | Gas | 2.6 | 0.1 | 0.7       | -0.3        | 3.0   |
| 4 Pr<br>DS,beta,S1  | Gas | 2.6 | 0.0 | 0.0       | 0.4         | 3.0   |
| 4TS2<br>DC,beta,S1  | Gas | 1.9 | 0.3 | 0.9       | -0.1        | 3.0   |
| 4 Pr<br>DC,beta,S1  | Gas | 1.9 | 0.3 | 0.9       | -0.1        | 3.0   |

## Model-S2- Charges and Spin state

**Table S24:** Group charges of optimized geometries for the C<sup>alpha</sup> pathway of substrate (2-phenyl butanoic acid or 2-phenylbutyrate; S2) activation by a P450 OleT<sub>JE</sub> model complex as calculated at the UB3LYP level of theory.

| System               |     | Fe   | O     | Substrate | Amino Acids | Total |
|----------------------|-----|------|-------|-----------|-------------|-------|
| 4Re S2               | Gas | 0.49 | -0.34 | -0.65     | 0.99        | 0.00  |
| 4 TS1<br>alpha,HA,S2 | Gas | 0.49 | -0.50 | -0.39     | 0.40        | 0.00  |
| 4IM1 alpha,S2        | Gas | 0.46 | -0.65 | -0.22     | 0.41        | 0.00  |
| 4TS2<br>reb,alpha,S2 | Gas | 0.48 | -0.61 | -0.19     | 0.32        | 0.00  |
| 4Pr OH,alpha,S2      | Gas | 0.58 | -0.62 | 0.02      | 0.02        | 0.00  |
| 4Pr DS,alpha,S2      | Gas | 0.60 | -0.75 | 0.18      | -0.03       | 0.00  |

**Table S25:** Group spin densities of optimized geometries for the C<sup>alpha</sup> pathway of substrate (2-phenyl butanoic acid or 2-phenylbutyrate; S2) activation by a P450 OleT<sub>JE</sub> model complex as calculated at the UB3LYP level of theory.

| System               |     | Fe   | O     | Substrate | Amino Acids | Total |
|----------------------|-----|------|-------|-----------|-------------|-------|
| 4Re S2               | Gas | 1.06 | 0.96  | 0.00      | 2.04        | 3.00  |
| 4 TS1<br>alpha,HA,S2 | Gas | 1.30 | 0.75  | 0.45      | 0.50        | 3.00  |
| 4IM1 alpha,S2        | Gas | 1.84 | 0.34  | 1.00      | -0.17       | 3.00  |
| 4TS2<br>reb,alpha,S2 | Gas | 1.99 | -0.03 | 0.85      | 0.20        | 3.00  |
| 4Pr OH,alpha,S2      | Gas | 2.58 | 0.01  | 0.00      | 0.42        | 3.00  |
| 4Pr DS,alpha,S2      | Gas | 2.62 | 0.03  | 0.00      | 0.34        | 3.00  |

**Table S26:** Group charges of optimized geometries for the C<sup>beta</sup> pathway of substrate (2-phenyl butanoic acid or 2-phenylbutyrate; S2) activation by a P450 OleT<sub>JE</sub> model complex as calculated at the UB3LYP level of theory.

| System              |     | Fe   | O     | Substrate | Amino Acids | Total |
|---------------------|-----|------|-------|-----------|-------------|-------|
| 4 TS1<br>beta,HA,S2 | Gas | 0.46 | -0.52 | -0.32     | 0.38        | 0.00  |
| 4IM1 beta,S2        | Gas | 0.44 | -0.60 | -0.23     | 0.39        | 0.00  |
| 4 TS2<br>beta,DS,S2 | Gas | 0.54 | -0.70 | -0.01     | 0.17        | 0.00  |
| 4 Pr<br>beta,DS,S2  | Gas | 0.60 | -0.76 | 0.19      | -0.03       | 0.00  |
| 4 TS2<br>beta,DC,S2 | Gas | 0.45 | -0.61 | -0.26     | 0.42        | 0.00  |
| 4 Pr<br>beta,DC,S2  | Gas | 0.45 | -0.61 | -0.29     | 0.45        | 0.00  |

**Table S27:** Group spin densities of optimized geometries for the C<sup>beta</sup> pathway of substrate (2-phenyl butanoic acid or 2-phenylbutyrate; S2) activation by a P450 OleT<sub>JE</sub> model complex as calculated at the UB3LYP level of theory.

| System              |     | Fe   | O    | Substrate | Amino Acids | Total |
|---------------------|-----|------|------|-----------|-------------|-------|
| 4 TS1<br>beta,HA,S2 | Gas | 1.33 | 0.69 | 0.54      | 0.44        | 3.00  |
| 4IM1 beta,S2        | Gas | 1.82 | 0.30 | 0.97      | -0.09       | 3.00  |
| 4 TS2<br>beta,DS,S2 | Gas | 2.34 | 0.07 | 0.70      | -0.11       | 3.00  |
| 4 Pr<br>beta,DS,S2  | Gas | 2.61 | 0.03 | 0.00      | 0.35        | 3.00  |
| 4 TS2<br>beta,DC,S2 | Gas | 1.85 | 0.30 | 0.94      | -0.09       | 3.00  |
| 4 Pr<br>beta,DC,S2  | Gas | 1.85 | 0.26 | 0.92      | -0.04       | 3.00  |

**Table S28:** Group charges of optimized geometries for the C<sup>gamma</sup> pathway of substrate (2-phenyl butanoic acid or 2-phenylbutyrate; S2) activation by a P450 OleT<sub>JE</sub> model complex as calculated at the UB3LYP level of theory.

| System                        |     | Fe   | O     | Substrate | Amino Acids | Total |
|-------------------------------|-----|------|-------|-----------|-------------|-------|
| 4 TS<br>gamma,HA,S2           | Gas | 0.46 | -0.56 | -0.35     | 0.45        | 0.00  |
| 4IM1<br>gamma,HA,S2           | Gas | 0.42 | -0.63 | -0.28     | 0.49        | 0.00  |
| 4 TS2<br>gamma,rebou<br>nd,S2 | Gas | 0.42 | -0.63 | -0.27     | 0.48        | 0.00  |
| 4Pr<br>gamma,OH,S2            | Gas | 0.53 | -0.64 | 0.01      | 0.10        | 0.00  |
| 4 TS2<br>gamma,DS,S2          | Gas | 0.38 | -0.63 | 0.01      | 0.24        | 0.00  |
| 4Pr<br>gamma,DS,S2            | Gas | 0.57 | -0.68 | 0.17      | -0.05       | 0.00  |

**Table S29:** Group spin densities of optimized geometries for the C<sup>gamma</sup> pathway of substrate (2-phenyl butanoic acid or 2-phenylbutyrate; S2) activation by a P450 OleT<sub>JE</sub> model complex as calculated at the UB3LYP level of theory.

| System                        |     | Fe   | O    | Substrate | Amino Acids | Total |
|-------------------------------|-----|------|------|-----------|-------------|-------|
| 4 TS<br>gamma,HA,S2           | Gas | 0.88 | 0.59 | 0.58      | 0.95        | 3.00  |
| 4IM1<br>gamma,HA,S2           | Gas | 0.87 | 0.20 | 0.97      | 0.97        | 3.00  |
| 4 TS2<br>gamma,rebou<br>nd,S2 | Gas | 0.87 | 0.20 | 0.97      | 0.97        | 3.00  |
| 4Pr<br>gamma,OH,S2            | Gas | 2.49 | 0.00 | 0.00      | 0.51        | 3.00  |
| 4 TS2<br>gamma,DS,S2          | Gas | 1.00 | 0.31 | 1.51      | 0.19        | 3.00  |
| 4Pr<br>gamma,DS,S2            | Gas | 2.60 | 0.02 | 0.00      | 0.37        | 3.00  |

# Cartesian coordinates of optimized geometries:

## Model-S1 Data

<sup>2</sup>Res1

|    |              |              |              |
|----|--------------|--------------|--------------|
| 26 | -5.416003000 | -2.059434000 | -3.254485000 |
| 16 | -6.515756000 | -3.365337000 | -5.152833000 |
| 1  | -7.074389000 | -2.298042000 | -5.831057000 |
| 6  | 5.329831000  | 3.876489000  | 1.470870000  |
| 6  | 5.234417000  | 2.360104000  | 1.808626000  |
| 6  | 3.805495000  | 1.762519000  | 1.779686000  |
| 6  | 3.251764000  | 1.668977000  | 0.344067000  |
| 6  | 3.800480000  | 0.373017000  | 2.448852000  |
| 6  | 4.903280000  | 4.770399000  | 2.620226000  |
| 8  | 3.694326000  | 5.045723000  | 2.857607000  |
| 1  | 4.691850000  | 4.107647000  | 0.612994000  |
| 1  | 5.855900000  | 1.812291000  | 1.085734000  |
| 1  | 5.686150000  | 2.190223000  | 2.797021000  |
| 1  | 3.148534000  | 2.424315000  | 2.360871000  |
| 1  | 2.209243000  | 1.334507000  | 0.339662000  |
| 1  | 3.279701000  | 2.635569000  | -0.173020000 |
| 1  | 3.842798000  | 0.956592000  | -0.247891000 |
| 1  | 2.801653000  | -0.076363000 | 2.420172000  |
| 1  | 4.120479000  | 0.431824000  | 3.497410000  |
| 1  | 4.483815000  | -0.311098000 | 1.927497000  |
| 7  | 5.909697000  | 5.244483000  | 3.407587000  |
| 6  | 5.697069000  | 6.111406000  | 4.568295000  |
| 6  | 6.542426000  | 7.404595000  | 4.489550000  |
| 6  | 8.035236000  | 7.137988000  | 4.419513000  |
| 6  | 8.766661000  | 6.836647000  | 5.583234000  |
| 6  | 10.133845000 | 6.550955000  | 5.517044000  |
| 6  | 10.795702000 | 6.560135000  | 4.282493000  |
| 6  | 10.082021000 | 6.860860000  | 3.117539000  |
| 6  | 8.712728000  | 7.147625000  | 3.186885000  |
| 1  | 6.865134000  | 5.010507000  | 3.174057000  |
| 1  | 5.943124000  | 5.563637000  | 5.487867000  |
| 1  | 6.222348000  | 7.979901000  | 3.613062000  |
| 1  | 6.310000000  | 8.009250000  | 5.375590000  |
| 1  | 8.262359000  | 6.835177000  | 6.546179000  |
| 1  | 10.683076000 | 6.326777000  | 6.426126000  |
| 1  | 11.857397000 | 6.341506000  | 4.231313000  |
| 1  | 10.589073000 | 6.879529000  | 2.157879000  |
| 1  | 8.167098000  | 7.398046000  | 2.280957000  |
| 6  | 2.086603000  | 1.622453000  | -3.709733000 |
| 6  | 0.928266000  | 2.533292000  | -3.249330000 |
| 6  | -0.163463000 | 2.761723000  | -4.308526000 |
| 6  | 1.664177000  | 0.172517000  | -4.004576000 |
| 1  | 2.557805000  | 2.055504000  | -4.606807000 |
| 1  | 0.475849000  | 2.114861000  | -2.339322000 |
| 1  | 1.347234000  | 3.510242000  | -2.963610000 |

|   |              |              |              |
|---|--------------|--------------|--------------|
| 1 | 0.261829000  | 3.186909000  | -5.229407000 |
| 1 | -0.664785000 | 1.822923000  | -4.576586000 |
| 1 | -0.925867000 | 3.452042000  | -3.931783000 |
| 1 | 2.530784000  | -0.450626000 | -4.260440000 |
| 1 | 0.959255000  | 0.123436000  | -4.843221000 |
| 1 | 1.173958000  | -0.273356000 | -3.130150000 |
| 6 | -2.530528000 | 6.264056000  | -0.595589000 |
| 6 | -1.417567000 | 5.928182000  | 0.431012000  |
| 6 | -0.103107000 | 5.439650000  | -0.204152000 |
| 6 | 0.905361000  | 4.932917000  | 0.843161000  |
| 7 | 0.390014000  | 3.724463000  | 1.505185000  |
| 6 | 0.356940000  | 3.513315000  | 2.824213000  |
| 7 | 1.117432000  | 4.258330000  | 3.673832000  |
| 7 | -0.452748000 | 2.555526000  | 3.315223000  |
| 6 | -2.864551000 | 5.081302000  | -1.496620000 |
| 8 | -2.321135000 | 4.975050000  | -2.631582000 |
| 1 | -2.192166000 | 7.066791000  | -1.258101000 |
| 1 | -1.780310000 | 5.157222000  | 1.122224000  |
| 1 | -1.221735000 | 6.824872000  | 1.037383000  |
| 1 | -0.308296000 | 4.638190000  | -0.922910000 |
| 1 | 0.364105000  | 6.254214000  | -0.774377000 |
| 1 | 1.865434000  | 4.710455000  | 0.363126000  |
| 1 | 1.093622000  | 5.702464000  | 1.598852000  |
| 1 | 0.002489000  | 2.954187000  | 0.885987000  |
| 1 | 1.996355000  | 4.672123000  | 3.362423000  |
| 1 | 0.927255000  | 4.229303000  | 4.661949000  |
| 1 | -1.099103000 | 2.012857000  | 2.675518000  |
| 1 | -0.300100000 | 2.207538000  | 4.248968000  |
| 7 | -3.713506000 | 4.128979000  | -1.023040000 |
| 6 | -3.982641000 | 2.898831000  | -1.811990000 |
| 6 | -5.130530000 | 2.215639000  | -1.047262000 |
| 6 | -4.922184000 | 2.675888000  | 0.413614000  |
| 6 | -4.438238000 | 4.133062000  | 0.270465000  |
| 1 | -3.075144000 | 2.283451000  | -1.837342000 |
| 1 | -6.098504000 | 2.573992000  | -1.423089000 |
| 1 | -5.110701000 | 1.127834000  | -1.155945000 |
| 1 | -5.833133000 | 2.603896000  | 1.016343000  |
| 1 | -4.144466000 | 2.072525000  | 0.896183000  |
| 1 | -3.784239000 | 4.430215000  | 1.094015000  |
| 1 | -5.284547000 | 4.835471000  | 0.232867000  |
| 6 | -0.920988000 | -3.078980000 | -8.691171000 |
| 6 | -0.983199000 | -1.568680000 | -8.621158000 |
| 6 | -2.107956000 | -0.869479000 | -9.091834000 |
| 6 | -2.180272000 | 0.525539000  | -8.997723000 |
| 6 | -1.125737000 | 1.249014000  | -8.427116000 |
| 6 | 0.003405000  | 0.565736000  | -7.956525000 |
| 6 | 0.072824000  | -0.829054000 | -8.057146000 |
| 1 | 0.102250000  | -3.430710000 | -8.864022000 |
| 1 | -1.268969000 | -3.531568000 | -7.752550000 |
| 1 | -2.931265000 | -1.422852000 | -9.534804000 |

|   |               |              |              |
|---|---------------|--------------|--------------|
| 1 | -3.056713000  | 1.045231000  | -9.372946000 |
| 1 | -1.176811000  | 2.330876000  | -8.356218000 |
| 1 | 0.828103000   | 1.117703000  | -7.516956000 |
| 1 | 0.958393000   | -1.349839000 | -7.701897000 |
| 6 | -7.954454000  | -3.539463000 | -1.466262000 |
| 6 | -6.748867000  | -4.221207000 | -1.547765000 |
| 6 | -6.476902000  | -5.490491000 | -0.906253000 |
| 6 | -5.202519000  | -5.844372000 | -1.242677000 |
| 6 | -4.680166000  | -4.791481000 | -2.087331000 |
| 7 | -5.639979000  | -3.806190000 | -2.265411000 |
| 6 | -3.407342000  | -4.769932000 | -2.632623000 |
| 6 | -2.892477000  | -3.755961000 | -3.431157000 |
| 6 | -1.554845000  | -3.745455000 | -3.982095000 |
| 6 | -1.426503000  | -2.586748000 | -4.695305000 |
| 6 | -2.686102000  | -1.883867000 | -4.586840000 |
| 7 | -3.571591000  | -2.612624000 | -3.811637000 |
| 6 | -2.954991000  | -0.660895000 | -5.186800000 |
| 6 | -4.160036000  | 0.019366000  | -5.105951000 |
| 6 | -4.428012000  | 1.293488000  | -5.737878000 |
| 6 | -5.719234000  | 1.622430000  | -5.438518000 |
| 6 | -6.250149000  | 0.551883000  | -4.620618000 |
| 7 | -5.284910000  | -0.420701000 | -4.426247000 |
| 6 | -7.544485000  | 0.509353000  | -4.116439000 |
| 6 | -8.067421000  | -0.507100000 | -3.335717000 |
| 6 | -9.407678000  | -0.530014000 | -2.792991000 |
| 6 | -9.518978000  | -1.664497000 | -2.041691000 |
| 6 | -8.250433000  | -2.354897000 | -2.117801000 |
| 7 | -7.373774000  | -1.644345000 | -2.931152000 |
| 1 | -8.735531000  | -3.980887000 | -0.856351000 |
| 1 | -2.756128000  | -5.609433000 | -2.413253000 |
| 1 | -2.161861000  | -0.204528000 | -5.768737000 |
| 1 | -8.196655000  | 1.344458000  | -4.349700000 |
| 8 | -1.903344000  | 1.038794000  | 1.651340000  |
| 6 | -1.343311000  | 0.867983000  | 0.497444000  |
| 8 | -0.462812000  | 1.672668000  | 0.001484000  |
| 6 | -1.769679000  | -0.325276000 | -0.350794000 |
| 6 | -2.164154000  | -1.575978000 | 0.467186000  |
| 1 | -2.640096000  | -0.024830000 | -0.950926000 |
| 1 | -0.958911000  | -0.549272000 | -1.051616000 |
| 1 | -2.881482000  | -1.261103000 | 1.231638000  |
| 8 | -4.923764000  | -1.226398000 | -1.900122000 |
| 1 | -1.553770000  | -3.469074000 | -9.494996000 |
| 1 | 2.861038000   | 1.612453000  | -2.928638000 |
| 1 | -4.233535000  | 3.161201000  | -2.843012000 |
| 1 | -3.420163000  | 6.620951000  | -0.062089000 |
| 1 | 6.361073000   | 4.117896000  | 1.183669000  |
| 1 | 4.631567000   | 6.350676000  | 4.590063000  |
| 1 | -10.372500000 | -2.014234000 | -1.479583000 |
| 1 | -7.181576000  | -6.027988000 | -0.288873000 |
| 1 | -6.272779000  | 2.501760000  | -5.733648000 |



|   |               |              |              |
|---|---------------|--------------|--------------|
| 1 | -10.151531000 | 0.233791000  | -2.966845000 |
| 1 | -4.653256000  | -6.728463000 | -0.954082000 |
| 1 | -0.823083000  | -4.525716000 | -3.831871000 |
| 1 | -3.709300000  | 1.844529000  | -6.325065000 |
| 1 | -0.570953000  | -2.221910000 | -5.243405000 |
| 6 | -0.986252000  | -2.274913000 | 1.119518000  |
| 6 | -0.535767000  | -1.899746000 | 2.399035000  |
| 6 | -0.299820000  | -3.303122000 | 0.448739000  |
| 6 | 0.564151000   | -2.534762000 | 2.987279000  |
| 1 | -1.052171000  | -1.097487000 | 2.915735000  |
| 6 | 0.800985000   | -3.939340000 | 1.033353000  |
| 1 | -0.634889000  | -3.602802000 | -0.541376000 |
| 6 | 1.237391000   | -3.557770000 | 2.307464000  |
| 1 | 0.893401000   | -2.235976000 | 3.978922000  |
| 1 | 1.315542000   | -4.732414000 | 0.497728000  |
| 1 | 2.088596000   | -4.052841000 | 2.765655000  |
| 1 | -2.682350000  | -2.272239000 | -0.202293000 |

#### <sup>4</sup>Res1

|    |              |              |              |
|----|--------------|--------------|--------------|
| 26 | -4.652674000 | -2.578096000 | -2.555227000 |
| 16 | -5.846657000 | -4.460197000 | -3.837204000 |
| 1  | -7.031286000 | -3.797980000 | -4.101497000 |
| 6  | 6.348896000  | 3.828818000  | 0.744805000  |
| 6  | 6.026631000  | 2.509681000  | 1.500362000  |
| 6  | 4.538638000  | 2.081480000  | 1.473249000  |
| 6  | 4.086467000  | 1.651148000  | 0.063745000  |
| 6  | 4.296645000  | 0.942788000  | 2.484320000  |
| 6  | 5.800493000  | 5.069945000  | 1.427459000  |
| 8  | 4.745566000  | 5.642556000  | 1.043778000  |
| 1  | 5.924507000  | 3.799989000  | -0.261195000 |
| 1  | 6.632125000  | 1.706878000  | 1.055920000  |
| 1  | 6.359737000  | 2.606482000  | 2.544929000  |
| 1  | 3.929650000  | 2.943882000  | 1.781683000  |
| 1  | 3.018003000  | 1.411844000  | 0.047547000  |
| 1  | 4.252003000  | 2.439270000  | -0.680066000 |
| 1  | 4.642366000  | 0.760407000  | -0.260029000 |
| 1  | 3.246696000  | 0.630990000  | 2.480915000  |
| 1  | 4.559859000  | 1.250207000  | 3.505413000  |
| 1  | 4.903658000  | 0.062849000  | 2.232397000  |
| 7  | 6.523235000  | 5.530728000  | 2.493243000  |
| 6  | 6.193599000  | 6.743734000  | 3.245163000  |
| 6  | 5.933774000  | 6.496791000  | 4.752510000  |
| 6  | 4.615346000  | 5.822950000  | 5.081472000  |
| 6  | 3.463626000  | 6.597641000  | 5.316264000  |
| 6  | 2.244014000  | 5.993847000  | 5.646486000  |
| 6  | 2.155723000  | 4.597288000  | 5.743489000  |
| 6  | 3.292769000  | 3.814868000  | 5.503731000  |
| 6  | 4.510326000  | 4.424798000  | 5.178297000  |
| 1  | 7.376324000  | 5.045600000  | 2.734984000  |
| 1  | 5.313925000  | 7.178913000  | 2.765642000  |

|   |              |              |              |
|---|--------------|--------------|--------------|
| 1 | 6.766441000  | 5.909268000  | 5.162782000  |
| 1 | 5.972948000  | 7.474279000  | 5.250303000  |
| 1 | 3.528391000  | 7.681181000  | 5.261651000  |
| 1 | 1.373283000  | 6.610015000  | 5.848975000  |
| 1 | 1.218960000  | 4.128007000  | 6.029181000  |
| 1 | 3.235448000  | 2.734029000  | 5.581702000  |
| 1 | 5.389670000  | 3.810056000  | 5.011755000  |
| 6 | 2.953858000  | 0.249364000  | -3.803340000 |
| 6 | 1.912008000  | 1.380998000  | -3.673752000 |
| 6 | 0.787835000  | 1.327993000  | -4.723374000 |
| 6 | 2.397871000  | -1.148709000 | -3.481794000 |
| 1 | 3.372952000  | 0.253511000  | -4.822101000 |
| 1 | 1.471904000  | 1.356496000  | -2.667087000 |
| 1 | 2.432545000  | 2.346767000  | -3.764707000 |
| 1 | 1.199085000  | 1.375112000  | -5.742548000 |
| 1 | 0.204212000  | 0.403099000  | -4.640605000 |
| 1 | 0.095399000  | 2.167228000  | -4.594020000 |
| 1 | 3.180108000  | -1.915250000 | -3.553361000 |
| 1 | 1.591090000  | -1.428949000 | -4.169237000 |
| 1 | 1.989066000  | -1.175482000 | -2.464004000 |
| 6 | -1.576081000 | 5.943826000  | -2.522809000 |
| 6 | -0.438428000 | 5.915961000  | -1.469770000 |
| 6 | 0.838627000  | 5.192808000  | -1.933798000 |
| 6 | 1.871750000  | 5.048201000  | -0.800784000 |
| 7 | 1.352149000  | 4.165809000  | 0.254724000  |
| 6 | 1.359622000  | 4.432870000  | 1.564887000  |
| 7 | 2.133063000  | 5.427922000  | 2.076427000  |
| 7 | 0.575523000  | 3.708127000  | 2.386299000  |
| 6 | -1.989645000 | 4.553071000  | -2.986256000 |
| 8 | -1.521027000 | 4.080619000  | -4.063017000 |
| 1 | -1.236782000 | 6.473409000  | -3.418274000 |
| 1 | -0.798143000 | 5.434144000  | -0.552317000 |
| 1 | -0.193280000 | 6.954005000  | -1.200889000 |
| 1 | 0.590256000  | 4.197799000  | -2.321054000 |
| 1 | 1.302587000  | 5.742086000  | -2.764321000 |
| 1 | 2.811156000  | 4.642660000  | -1.194095000 |
| 1 | 2.100302000  | 6.027740000  | -0.368366000 |
| 1 | 0.953450000  | 3.229373000  | -0.039157000 |
| 1 | 3.003700000  | 5.690201000  | 1.616710000  |
| 1 | 2.023583000  | 5.690147000  | 3.044343000  |
| 1 | -0.096287000 | 2.992612000  | 1.998860000  |
| 1 | 0.756359000  | 3.726345000  | 3.378065000  |
| 7 | -2.827665000 | 3.829187000  | -2.199941000 |
| 6 | -3.178263000 | 2.426847000  | -2.550692000 |
| 6 | -4.288576000 | 2.061674000  | -1.549799000 |
| 6 | -3.984791000 | 2.949879000  | -0.321848000 |
| 6 | -3.482204000 | 4.268512000  | -0.942722000 |
| 1 | -2.290068000 | 1.794614000  | -2.434718000 |
| 1 | -5.270776000 | 2.316234000  | -1.969471000 |
| 1 | -4.288354000 | 0.993847000  | -1.316319000 |

|   |              |              |               |
|---|--------------|--------------|---------------|
| 1 | -4.860025000 | 3.106407000  | 0.316699000   |
| 1 | -3.192036000 | 2.504147000  | 0.290132000   |
| 1 | -2.780172000 | 4.789265000  | -0.287737000  |
| 1 | -4.315997000 | 4.950659000  | -1.166795000  |
| 6 | -2.046412000 | 0.493079000  | -9.772310000  |
| 6 | -2.803741000 | 1.406933000  | -8.831888000  |
| 6 | -4.154403000 | 1.720691000  | -9.070547000  |
| 6 | -4.845619000 | 2.598386000  | -8.227533000  |
| 6 | -4.197981000 | 3.171406000  | -7.123973000  |
| 6 | -2.856224000 | 2.862118000  | -6.863882000  |
| 6 | -2.170866000 | 1.985937000  | -7.717036000  |
| 1 | -1.148177000 | 0.084838000  | -9.296987000  |
| 1 | -2.666196000 | -0.347651000 | -10.104825000 |
| 1 | -4.662712000 | 1.279568000  | -9.924198000  |
| 1 | -5.884644000 | 2.838492000  | -8.436124000  |
| 1 | -4.731017000 | 3.857743000  | -6.472820000  |
| 1 | -2.349664000 | 3.292866000  | -6.004191000  |
| 1 | -1.127833000 | 1.756221000  | -7.514924000  |
| 6 | -5.219093000 | -4.698448000 | 0.090054000   |
| 6 | -4.027294000 | -4.847616000 | -0.604376000  |
| 6 | -2.993296000 | -5.802763000 | -0.268845000  |
| 6 | -2.005074000 | -5.667237000 | -1.201719000  |
| 6 | -2.420706000 | -4.620605000 | -2.110405000  |
| 7 | -3.662960000 | -4.131037000 | -1.732179000  |
| 6 | -1.677814000 | -4.169060000 | -3.188433000  |
| 6 | -2.050020000 | -3.142478000 | -4.046202000  |
| 6 | -1.250289000 | -2.669423000 | -5.156526000  |
| 6 | -1.947078000 | -1.652025000 | -5.743189000  |
| 6 | -3.179995000 | -1.502860000 | -4.999999000  |
| 7 | -3.225982000 | -2.421414000 | -3.966199000  |
| 6 | -4.170208000 | -0.579648000 | -5.303805000  |
| 6 | -5.369610000 | -0.444805000 | -4.620753000  |
| 6 | -6.396682000 | 0.518583000  | -4.952178000  |
| 6 | -7.415731000 | 0.336930000  | -4.060302000  |
| 6 | -7.018312000 | -0.737511000 | -3.176186000  |
| 7 | -5.766745000 | -1.208349000 | -3.533424000  |
| 6 | -7.789397000 | -1.226230000 | -2.128303000  |
| 6 | -7.421568000 | -2.250461000 | -1.273834000  |
| 6 | -8.223959000 | -2.742913000 | -0.176278000  |
| 6 | -7.496971000 | -3.712696000 | 0.451596000   |
| 6 | -6.241208000 | -3.832364000 | -0.255404000  |
| 7 | -6.212586000 | -2.940807000 | -1.323353000  |
| 1 | -5.370624000 | -5.327152000 | 0.960901000   |
| 1 | -0.720595000 | -4.646322000 | -3.369806000  |
| 1 | -3.991473000 | 0.088291000  | -6.139356000  |
| 1 | -8.757521000 | -0.764334000 | -1.965121000  |
| 8 | -0.975815000 | 1.748500000  | 1.377390000   |
| 6 | -0.450180000 | 1.168867000  | 0.347028000   |
| 8 | 0.460938000  | 1.711145000  | -0.391659000  |
| 6 | -0.957577000 | -0.210879000 | -0.061959000  |

|   |              |              |               |
|---|--------------|--------------|---------------|
| 6 | -1.561864000 | -1.049495000 | 1.086625000   |
| 1 | -1.735179000 | -0.068354000 | -0.825976000  |
| 1 | -0.135020000 | -0.742673000 | -0.552498000  |
| 1 | -2.242005000 | -0.400122000 | 1.648090000   |
| 8 | -3.950317000 | -1.447260000 | -1.572861000  |
| 1 | -1.721090000 | 1.031226000  | -10.673188000 |
| 1 | 3.792984000  | 0.459503000  | -3.123531000  |
| 1 | -3.494097000 | 2.367759000  | -3.595207000  |
| 1 | -2.433960000 | 6.492050000  | -2.113391000  |
| 1 | 7.438113000  | 3.926470000  | 0.640413000   |
| 1 | 7.020639000  | 7.458752000  | 3.142876000   |
| 1 | -7.770234000 | -4.300979000 | 1.315274000   |
| 1 | -3.037018000 | -6.484487000 | 0.567724000   |
| 1 | -8.353013000 | 0.869999000  | -3.994168000  |
| 1 | -9.210076000 | -2.378550000 | 0.072029000   |
| 1 | -1.077952000 | -6.215649000 | -1.281812000  |
| 1 | -0.285742000 | -3.069542000 | -5.431952000  |
| 1 | -6.322547000 | 1.228576000  | -5.762400000  |
| 1 | -1.672148000 | -1.045558000 | -6.592703000  |
| 6 | -0.531867000 | -1.650565000 | 2.025394000   |
| 6 | 0.045639000  | -0.886311000 | 3.057921000   |
| 6 | -0.119035000 | -2.986818000 | 1.878081000   |
| 6 | 1.004846000  | -1.443051000 | 3.911269000   |
| 1 | -0.266380000 | 0.146446000  | 3.172552000   |
| 6 | 0.841403000  | -3.545569000 | 2.729909000   |
| 1 | -0.561978000 | -3.594229000 | 1.092558000   |
| 6 | 1.408271000  | -2.775068000 | 3.751210000   |
| 1 | 1.433634000  | -0.839825000 | 4.707384000   |
| 1 | 1.143106000  | -4.581155000 | 2.598782000   |
| 1 | 2.150498000  | -3.207333000 | 4.416070000   |
| 1 | -2.163717000 | -1.850276000 | 0.642364000   |

#### <sup>4</sup>TS1<sub>HA,α,S1</sub>

|    |              |              |              |
|----|--------------|--------------|--------------|
| 26 | -3.245746000 | -2.343708000 | -1.718916000 |
| 16 | -3.040019000 | -4.488283000 | -2.947969000 |
| 1  | -4.323229000 | -4.547729000 | -3.459773000 |
| 6  | 6.007494000  | 1.272783000  | 1.079925000  |
| 6  | 5.123040000  | 0.403614000  | 2.018871000  |
| 6  | 3.608161000  | 0.428401000  | 1.705058000  |
| 6  | 3.271797000  | -0.296777000 | 0.386618000  |
| 6  | 2.800427000  | -0.187761000 | 2.864065000  |
| 6  | 5.833237000  | 2.764914000  | 1.300986000  |
| 8  | 4.996667000  | 3.449800000  | 0.652724000  |
| 1  | 5.758247000  | 1.067451000  | 0.035805000  |
| 1  | 5.481401000  | -0.634047000 | 1.958131000  |
| 1  | 5.286357000  | 0.727627000  | 3.057587000  |
| 1  | 3.296815000  | 1.476057000  | 1.600889000  |
| 1  | 2.193099000  | -0.248664000 | 0.201771000  |
| 1  | 3.786373000  | 0.148825000  | -0.473710000 |
| 1  | 3.569387000  | -1.353875000 | 0.445458000  |

|   |              |              |              |
|---|--------------|--------------|--------------|
| 1 | 1.729558000  | -0.139911000 | 2.641755000  |
| 1 | 2.981504000  | 0.344402000  | 3.807094000  |
| 1 | 3.070721000  | -1.241803000 | 3.016216000  |
| 7 | 6.633731000  | 3.321396000  | 2.260271000  |
| 6 | 6.655269000  | 4.749376000  | 2.587708000  |
| 6 | 6.305056000  | 5.061482000  | 4.064650000  |
| 6 | 4.843766000  | 4.897559000  | 4.435839000  |
| 6 | 3.976056000  | 6.005706000  | 4.406367000  |
| 6 | 2.630746000  | 5.877384000  | 4.775115000  |
| 6 | 2.129039000  | 4.630797000  | 5.176252000  |
| 6 | 2.979684000  | 3.517754000  | 5.198465000  |
| 6 | 4.324306000  | 3.653494000  | 4.834479000  |
| 1 | 7.306280000  | 2.725065000  | 2.722433000  |
| 1 | 5.951801000  | 5.237604000  | 1.909739000  |
| 1 | 6.928754000  | 4.432113000  | 4.714470000  |
| 1 | 6.611723000  | 6.097753000  | 4.255685000  |
| 1 | 4.363208000  | 6.979530000  | 4.118109000  |
| 1 | 1.984629000  | 6.750063000  | 4.773667000  |
| 1 | 1.095290000  | 4.534231000  | 5.495067000  |
| 1 | 2.599810000  | 2.550177000  | 5.509932000  |
| 1 | 4.979717000  | 2.788952000  | 4.874919000  |
| 6 | 2.820695000  | 4.105083000  | -7.842512000 |
| 6 | 1.868481000  | 3.898558000  | -6.645040000 |
| 6 | 0.754875000  | 2.865447000  | -6.887838000 |
| 6 | 3.660519000  | 2.866619000  | -8.198629000 |
| 1 | 2.230475000  | 4.411270000  | -8.719253000 |
| 1 | 2.460436000  | 3.599905000  | -5.765670000 |
| 1 | 1.408848000  | 4.865024000  | -6.391411000 |
| 1 | 0.161098000  | 3.137487000  | -7.770828000 |
| 1 | 1.167101000  | 1.863521000  | -7.060696000 |
| 1 | 0.072519000  | 2.810147000  | -6.031626000 |
| 1 | 4.348916000  | 3.080338000  | -9.024982000 |
| 1 | 3.029555000  | 2.024048000  | -8.503494000 |
| 1 | 4.260562000  | 2.539842000  | -7.339217000 |
| 6 | -0.916077000 | 4.821096000  | -3.201761000 |
| 6 | 0.210518000  | 4.632951000  | -2.154136000 |
| 6 | 1.066461000  | 3.368827000  | -2.349381000 |
| 6 | 2.060612000  | 3.156932000  | -1.189996000 |
| 7 | 1.343753000  | 2.914417000  | 0.070445000  |
| 6 | 1.426277000  | 3.666165000  | 1.175251000  |
| 7 | 2.481072000  | 4.496620000  | 1.388827000  |
| 7 | 0.435162000  | 3.594802000  | 2.083486000  |
| 6 | -1.877797000 | 3.641480000  | -3.270587000 |
| 8 | -1.748406000 | 2.767105000  | -4.183298000 |
| 1 | -0.479906000 | 4.920121000  | -4.200228000 |
| 1 | -0.226559000 | 4.603046000  | -1.149099000 |
| 1 | 0.859186000  | 5.520680000  | -2.185808000 |
| 1 | 0.424637000  | 2.483816000  | -2.436838000 |
| 1 | 1.632815000  | 3.438195000  | -3.288632000 |
| 1 | 2.713821000  | 2.303831000  | -1.403107000 |

|   |              |              |               |
|---|--------------|--------------|---------------|
| 1 | 2.704254000  | 4.034188000  | -1.077993000  |
| 1 | 0.702114000  | 2.074479000  | 0.130406000   |
| 1 | 3.393187000  | 4.275820000  | 0.990794000   |
| 1 | 2.458757000  | 5.127460000  | 2.175630000   |
| 1 | -0.436205000 | 3.041886000  | 1.873591000   |
| 1 | 0.604455000  | 3.916063000  | 3.024352000   |
| 7 | -2.839431000 | 3.535128000  | -2.320784000  |
| 6 | -3.754140000 | 2.360025000  | -2.276081000  |
| 6 | -4.807617000 | 2.748474000  | -1.224978000  |
| 6 | -4.051405000 | 3.714490000  | -0.285683000  |
| 6 | -3.139492000 | 4.509111000  | -1.240453000  |
| 1 | -3.201309000 | 1.465723000  | -1.971847000  |
| 1 | -5.657099000 | 3.258321000  | -1.698373000  |
| 1 | -5.185464000 | 1.865773000  | -0.702946000  |
| 1 | -4.719799000 | 4.371268000  | 0.280366000   |
| 1 | -3.434242000 | 3.149874000  | 0.422580000   |
| 1 | -2.228503000 | 4.850048000  | -0.744508000  |
| 1 | -3.656545000 | 5.387015000  | -1.655992000  |
| 6 | -3.340509000 | 1.284639000  | -10.636543000 |
| 6 | -3.899824000 | 1.936438000  | -9.389991000  |
| 6 | -5.241153000 | 2.349930000  | -9.330666000  |
| 6 | -5.763126000 | 2.931532000  | -8.168830000  |
| 6 | -4.947814000 | 3.110570000  | -7.045398000  |
| 6 | -3.605179000 | 2.707250000  | -7.087935000  |
| 6 | -3.092219000 | 2.126178000  | -8.253926000  |
| 1 | -3.959153000 | 1.501196000  | -11.513922000 |
| 1 | -2.322365000 | 1.631403000  | -10.847583000 |
| 1 | -5.878879000 | 2.216601000  | -10.200682000 |
| 1 | -6.802239000 | 3.246934000  | -8.144290000  |
| 1 | -5.349843000 | 3.565026000  | -6.144910000  |
| 1 | -2.965386000 | 2.841266000  | -6.219688000  |
| 1 | -2.050016000 | 1.818630000  | -8.284082000  |
| 6 | -3.756265000 | -4.400962000 | 0.985897000   |
| 6 | -2.439572000 | -4.070408000 | 0.687956000   |
| 6 | -1.283687000 | -4.532581000 | 1.427190000   |
| 6 | -0.180701000 | -4.025950000 | 0.799517000   |
| 6 | -0.654427000 | -3.243248000 | -0.321566000  |
| 7 | -2.039317000 | -3.277047000 | -0.372818000  |
| 6 | 0.157090000  | -2.539343000 | -1.199459000  |
| 6 | -0.287418000 | -1.768429000 | -2.264844000  |
| 6 | 0.569459000  | -0.988798000 | -3.132838000  |
| 6 | -0.242903000 | -0.356734000 | -4.030972000  |
| 6 | -1.598931000 | -0.760566000 | -3.725599000  |
| 7 | -1.607807000 | -1.617423000 | -2.643602000  |
| 6 | -2.717501000 | -0.353129000 | -4.443744000  |
| 6 | -4.023852000 | -0.737415000 | -4.184332000  |
| 6 | -5.172776000 | -0.329013000 | -4.968560000  |
| 6 | -6.269097000 | -0.907724000 | -4.396487000  |
| 6 | -5.800191000 | -1.670151000 | -3.257145000  |
| 7 | -4.426647000 | -1.557294000 | -3.141360000  |

|   |              |              |               |
|---|--------------|--------------|---------------|
| 6 | -6.612280000 | -2.408260000 | -2.405309000  |
| 6 | -6.172164000 | -3.143714000 | -1.316131000  |
| 6 | -7.027442000 | -3.886285000 | -0.417321000  |
| 6 | -6.224683000 | -4.434481000 | 0.542037000   |
| 6 | -4.866176000 | -4.041796000 | 0.239517000   |
| 7 | -4.846754000 | -3.256968000 | -0.911156000  |
| 1 | -3.926612000 | -5.022784000 | 1.859063000   |
| 1 | 1.226859000  | -2.572882000 | -1.023822000  |
| 1 | -2.553756000 | 0.337184000  | -5.261795000  |
| 1 | -7.678815000 | -2.404835000 | -2.605700000  |
| 8 | -1.680304000 | 1.994973000  | 1.563651000   |
| 6 | -1.252062000 | 0.850812000  | 1.122410000   |
| 8 | -0.134490000 | 0.704849000  | 0.483134000   |
| 6 | -2.078152000 | -0.372055000 | 1.361251000   |
| 6 | -3.239697000 | -0.290840000 | 2.343299000   |
| 1 | -2.714301000 | -0.624372000 | 0.164221000   |
| 1 | -1.466271000 | -1.270981000 | 1.442254000   |
| 1 | -3.761530000 | 0.657169000  | 2.183830000   |
| 8 | -3.420662000 | -0.867478000 | -0.744272000  |
| 1 | -3.294179000 | 0.192370000  | -10.529061000 |
| 1 | 3.496502000  | 4.943269000  | -7.618743000  |
| 1 | -4.172210000 | 2.176604000  | -3.268672000  |
| 1 | -1.458004000 | 5.749847000  | -2.982163000  |
| 1 | 7.061721000  | 1.001992000  | 1.225042000   |
| 1 | 7.656876000  | 5.144868000  | 2.373218000   |
| 1 | -6.510858000 | -5.050501000 | 1.382141000   |
| 1 | -1.325612000 | -5.167027000 | 2.300523000   |
| 1 | -7.302331000 | -0.835810000 | -4.703878000  |
| 1 | -8.100506000 | -3.962822000 | -0.516328000  |
| 1 | 0.859140000  | -4.158562000 | 1.060077000   |
| 1 | 1.644232000  | -0.932005000 | -3.041703000  |
| 1 | -5.124850000 | 0.316348000  | -5.833403000  |
| 1 | 0.022137000  | 0.333189000  | -4.817186000  |
| 6 | -2.794577000 | -0.394256000 | 3.796989000   |
| 6 | -2.375769000 | 0.746652000  | 4.506126000   |
| 6 | -2.780751000 | -1.635606000 | 4.456529000   |
| 6 | -1.966881000 | 0.646591000  | 5.840235000   |
| 1 | -2.366860000 | 1.700675000  | 3.989947000   |
| 6 | -2.367839000 | -1.738047000 | 5.789882000   |
| 1 | -3.100402000 | -2.524564000 | 3.918851000   |
| 6 | -1.961315000 | -0.595192000 | 6.488369000   |
| 1 | -1.657046000 | 1.538936000  | 6.377812000   |
| 1 | -2.369336000 | -2.705663000 | 6.283778000   |
| 1 | -1.647052000 | -0.670984000 | 7.525237000   |
| 1 | -3.944445000 | -1.101674000 | 2.124629000   |

#### <sup>4</sup>IM1<sub>alpha,S1</sub>

|    |              |              |              |
|----|--------------|--------------|--------------|
| 26 | -4.652674000 | -2.578096000 | -2.555227000 |
| 16 | -5.846657000 | -4.460197000 | -3.837204000 |
| 1  | -7.031286000 | -3.797980000 | -4.101497000 |

|   |              |              |              |
|---|--------------|--------------|--------------|
| 6 | 6.348896000  | 3.828818000  | 0.744805000  |
| 6 | 6.026631000  | 2.509681000  | 1.500362000  |
| 6 | 4.538638000  | 2.081480000  | 1.473249000  |
| 6 | 4.086467000  | 1.651148000  | 0.063745000  |
| 6 | 4.296645000  | 0.942788000  | 2.484320000  |
| 6 | 5.800493000  | 5.069945000  | 1.427459000  |
| 8 | 4.745566000  | 5.642556000  | 1.043778000  |
| 1 | 5.924507000  | 3.799989000  | -0.261195000 |
| 1 | 6.632125000  | 1.706878000  | 1.055920000  |
| 1 | 6.359737000  | 2.606482000  | 2.544929000  |
| 1 | 3.929650000  | 2.943882000  | 1.781683000  |
| 1 | 3.018003000  | 1.411844000  | 0.047547000  |
| 1 | 4.252003000  | 2.439270000  | -0.680066000 |
| 1 | 4.642366000  | 0.760407000  | -0.260029000 |
| 1 | 3.246696000  | 0.630990000  | 2.480915000  |
| 1 | 4.559859000  | 1.250207000  | 3.505413000  |
| 1 | 4.903658000  | 0.062849000  | 2.232397000  |
| 7 | 6.523235000  | 5.530728000  | 2.493243000  |
| 6 | 6.193599000  | 6.743734000  | 3.245163000  |
| 6 | 5.933774000  | 6.496791000  | 4.752510000  |
| 6 | 4.615346000  | 5.822950000  | 5.081472000  |
| 6 | 3.463626000  | 6.597641000  | 5.316264000  |
| 6 | 2.244014000  | 5.993847000  | 5.646486000  |
| 6 | 2.155723000  | 4.597288000  | 5.743489000  |
| 6 | 3.292769000  | 3.814868000  | 5.503731000  |
| 6 | 4.510326000  | 4.424798000  | 5.178297000  |
| 1 | 7.376324000  | 5.045600000  | 2.734984000  |
| 1 | 5.313925000  | 7.178913000  | 2.765642000  |
| 1 | 6.766441000  | 5.909268000  | 5.162782000  |
| 1 | 5.972948000  | 7.474279000  | 5.250303000  |
| 1 | 3.528391000  | 7.681181000  | 5.261651000  |
| 1 | 1.373283000  | 6.610015000  | 5.848975000  |
| 1 | 1.218960000  | 4.128007000  | 6.029181000  |
| 1 | 3.235448000  | 2.734029000  | 5.581702000  |
| 1 | 5.389670000  | 3.810056000  | 5.011755000  |
| 6 | 2.953858000  | 0.249364000  | -3.803340000 |
| 6 | 1.912008000  | 1.380998000  | -3.673752000 |
| 6 | 0.787835000  | 1.327993000  | -4.723374000 |
| 6 | 2.397871000  | -1.148709000 | -3.481794000 |
| 1 | 3.372952000  | 0.253511000  | -4.822101000 |
| 1 | 1.471904000  | 1.356496000  | -2.667087000 |
| 1 | 2.432545000  | 2.346767000  | -3.764707000 |
| 1 | 1.199085000  | 1.375112000  | -5.742548000 |
| 1 | 0.204212000  | 0.403099000  | -4.640605000 |
| 1 | 0.095399000  | 2.167228000  | -4.594020000 |
| 1 | 3.180108000  | -1.915250000 | -3.553361000 |
| 1 | 1.591090000  | -1.428949000 | -4.169237000 |
| 1 | 1.989066000  | -1.175482000 | -2.464004000 |
| 6 | -1.576081000 | 5.943826000  | -2.522809000 |
| 6 | -0.438428000 | 5.915961000  | -1.469770000 |



|   |              |              |               |
|---|--------------|--------------|---------------|
| 6 | 0.838627000  | 5.192808000  | -1.933798000  |
| 6 | 1.871750000  | 5.048201000  | -0.800784000  |
| 7 | 1.352149000  | 4.165809000  | 0.254724000   |
| 6 | 1.359622000  | 4.432870000  | 1.564887000   |
| 7 | 2.133063000  | 5.427922000  | 2.076427000   |
| 7 | 0.575523000  | 3.708127000  | 2.386299000   |
| 6 | -1.989645000 | 4.553071000  | -2.986256000  |
| 8 | -1.521027000 | 4.080619000  | -4.063017000  |
| 1 | -1.236782000 | 6.473409000  | -3.418274000  |
| 1 | -0.798143000 | 5.434144000  | -0.552317000  |
| 1 | -0.193280000 | 6.954005000  | -1.200889000  |
| 1 | 0.590256000  | 4.197799000  | -2.321054000  |
| 1 | 1.302587000  | 5.742086000  | -2.764321000  |
| 1 | 2.811156000  | 4.642660000  | -1.194095000  |
| 1 | 2.100302000  | 6.027740000  | -0.368366000  |
| 1 | 0.953450000  | 3.229373000  | -0.039157000  |
| 1 | 3.003700000  | 5.690201000  | 1.616710000   |
| 1 | 2.023583000  | 5.690147000  | 3.044343000   |
| 1 | -0.096287000 | 2.992612000  | 1.998860000   |
| 1 | 0.756359000  | 3.726345000  | 3.378065000   |
| 7 | -2.827665000 | 3.829187000  | -2.199941000  |
| 6 | -3.178263000 | 2.426847000  | -2.550692000  |
| 6 | -4.288576000 | 2.061674000  | -1.549799000  |
| 6 | -3.984791000 | 2.949879000  | -0.321848000  |
| 6 | -3.482204000 | 4.268512000  | -0.942722000  |
| 1 | -2.290068000 | 1.794614000  | -2.434718000  |
| 1 | -5.270776000 | 2.316234000  | -1.969471000  |
| 1 | -4.288354000 | 0.993847000  | -1.316319000  |
| 1 | -4.860025000 | 3.106407000  | 0.316699000   |
| 1 | -3.192036000 | 2.504147000  | 0.290132000   |
| 1 | -2.780172000 | 4.789265000  | -0.287737000  |
| 1 | -4.315997000 | 4.950659000  | -1.166795000  |
| 6 | -2.046412000 | 0.493079000  | -9.772310000  |
| 6 | -2.803741000 | 1.406933000  | -8.831888000  |
| 6 | -4.154403000 | 1.720691000  | -9.070547000  |
| 6 | -4.845619000 | 2.598386000  | -8.227533000  |
| 6 | -4.197981000 | 3.171406000  | -7.123973000  |
| 6 | -2.856224000 | 2.862118000  | -6.863882000  |
| 6 | -2.170866000 | 1.985937000  | -7.717036000  |
| 1 | -1.148177000 | 0.084838000  | -9.296987000  |
| 1 | -2.666196000 | -0.347651000 | -10.104825000 |
| 1 | -4.662712000 | 1.279568000  | -9.924198000  |
| 1 | -5.884644000 | 2.838492000  | -8.436124000  |
| 1 | -4.731017000 | 3.857743000  | -6.472820000  |
| 1 | -2.349664000 | 3.292866000  | -6.004191000  |
| 1 | -1.127833000 | 1.756221000  | -7.514924000  |
| 6 | -5.219093000 | -4.698448000 | 0.090054000   |
| 6 | -4.027294000 | -4.847616000 | -0.604376000  |
| 6 | -2.993296000 | -5.802763000 | -0.268845000  |
| 6 | -2.005074000 | -5.667237000 | -1.201719000  |

|   |              |              |               |
|---|--------------|--------------|---------------|
| 6 | -2.420706000 | -4.620605000 | -2.110405000  |
| 7 | -3.662960000 | -4.131037000 | -1.732179000  |
| 6 | -1.677814000 | -4.169060000 | -3.188433000  |
| 6 | -2.050020000 | -3.142478000 | -4.046202000  |
| 6 | -1.250289000 | -2.669423000 | -5.156526000  |
| 6 | -1.947078000 | -1.652025000 | -5.743189000  |
| 6 | -3.179995000 | -1.502860000 | -4.999999000  |
| 7 | -3.225982000 | -2.421414000 | -3.966199000  |
| 6 | -4.170208000 | -0.579648000 | -5.303805000  |
| 6 | -5.369610000 | -0.444805000 | -4.620753000  |
| 6 | -6.396682000 | 0.518583000  | -4.952178000  |
| 6 | -7.415731000 | 0.336930000  | -4.060302000  |
| 6 | -7.018312000 | -0.737511000 | -3.176186000  |
| 7 | -5.766745000 | -1.208349000 | -3.533424000  |
| 6 | -7.789397000 | -1.226230000 | -2.128303000  |
| 6 | -7.421568000 | -2.250461000 | -1.273834000  |
| 6 | -8.223959000 | -2.742913000 | -0.176278000  |
| 6 | -7.496971000 | -3.712696000 | 0.451596000   |
| 6 | -6.241208000 | -3.832364000 | -0.255404000  |
| 7 | -6.212586000 | -2.940807000 | -1.323353000  |
| 1 | -5.370624000 | -5.327152000 | 0.960901000   |
| 1 | -0.720595000 | -4.646322000 | -3.369806000  |
| 1 | -3.991473000 | 0.088291000  | -6.139356000  |
| 1 | -8.757521000 | -0.764334000 | -1.965121000  |
| 8 | -0.975815000 | 1.748500000  | 1.377390000   |
| 6 | -0.450180000 | 1.168867000  | 0.347028000   |
| 8 | 0.460938000  | 1.711145000  | -0.391659000  |
| 6 | -0.957577000 | -0.210879000 | -0.061959000  |
| 6 | -1.561864000 | -1.049495000 | 1.086625000   |
| 1 | -1.735179000 | -0.068354000 | -0.825976000  |
| 1 | -0.135020000 | -0.742673000 | -0.552498000  |
| 1 | -2.242005000 | -0.400122000 | 1.648090000   |
| 8 | -3.950317000 | -1.447260000 | -1.572861000  |
| 1 | -1.721090000 | 1.031226000  | -10.673188000 |
| 1 | 3.792984000  | 0.459503000  | -3.123531000  |
| 1 | -3.494097000 | 2.367759000  | -3.595207000  |
| 1 | -2.433960000 | 6.492050000  | -2.113391000  |
| 1 | 7.438113000  | 3.926470000  | 0.640413000   |
| 1 | 7.020639000  | 7.458752000  | 3.142876000   |
| 1 | -7.770234000 | -4.300979000 | 1.315274000   |
| 1 | -3.037018000 | -6.484487000 | 0.567724000   |
| 1 | -8.353013000 | 0.869999000  | -3.994168000  |
| 1 | -9.210076000 | -2.378550000 | 0.072029000   |
| 1 | -1.077952000 | -6.215649000 | -1.281812000  |
| 1 | -0.285742000 | -3.069542000 | -5.431952000  |
| 1 | -6.322547000 | 1.228576000  | -5.762400000  |
| 1 | -1.672148000 | -1.045558000 | -6.592703000  |
| 6 | -0.531867000 | -1.650565000 | 2.025394000   |
| 6 | 0.045639000  | -0.886311000 | 3.057921000   |
| 6 | -0.119035000 | -2.986818000 | 1.878081000   |

|   |              |              |             |
|---|--------------|--------------|-------------|
| 6 | 1.004846000  | -1.443051000 | 3.911269000 |
| 1 | -0.266380000 | 0.146446000  | 3.172552000 |
| 6 | 0.841403000  | -3.545569000 | 2.729909000 |
| 1 | -0.561978000 | -3.594229000 | 1.092558000 |
| 6 | 1.408271000  | -2.775068000 | 3.751210000 |
| 1 | 1.433634000  | -0.839825000 | 4.707384000 |
| 1 | 1.143106000  | -4.581155000 | 2.598782000 |
| 1 | 2.150498000  | -3.207333000 | 4.416070000 |
| 1 | -2.163717000 | -1.850276000 | 0.642364000 |

#### <sup>4</sup>TS<sub>reb,alpha,S1</sub>

|    |              |              |              |
|----|--------------|--------------|--------------|
| 26 | -3.523894000 | -2.091571000 | -0.725640000 |
| 16 | -3.168791000 | -4.253206000 | -1.783753000 |
| 1  | -4.156845000 | -4.160727000 | -2.745425000 |
| 6  | 6.201420000  | 2.046597000  | -1.711560000 |
| 6  | 6.661983000  | 0.891735000  | -0.781897000 |
| 6  | 5.546855000  | 0.168465000  | 0.010634000  |
| 6  | 4.468876000  | -0.432600000 | -0.912276000 |
| 6  | 6.172154000  | -0.922203000 | 0.903706000  |
| 6  | 5.503215000  | 3.172468000  | -0.972363000 |
| 8  | 4.257968000  | 3.164459000  | -0.773406000 |
| 1  | 5.500383000  | 1.669675000  | -2.460473000 |
| 1  | 7.184975000  | 0.154003000  | -1.407520000 |
| 1  | 7.406949000  | 1.280641000  | -0.072145000 |
| 1  | 5.057433000  | 0.903227000  | 0.666243000  |
| 1  | 3.745157000  | -1.013468000 | -0.328203000 |
| 1  | 3.915372000  | 0.348896000  | -1.442848000 |
| 1  | 4.916708000  | -1.108565000 | -1.653176000 |
| 1  | 5.407654000  | -1.407635000 | 1.521039000  |
| 1  | 6.933726000  | -0.504702000 | 1.574476000  |
| 1  | 6.651594000  | -1.699584000 | 0.294280000  |
| 7  | 6.299700000  | 4.184437000  | -0.521294000 |
| 6  | 5.801196000  | 5.362429000  | 0.195469000  |
| 6  | 6.355613000  | 5.493282000  | 1.636281000  |
| 6  | 5.808545000  | 4.474786000  | 2.616832000  |
| 6  | 4.643956000  | 4.754059000  | 3.354879000  |
| 6  | 4.122980000  | 3.819171000  | 4.259081000  |
| 6  | 4.758054000  | 2.581726000  | 4.433942000  |
| 6  | 5.919114000  | 2.292768000  | 3.706460000  |
| 6  | 6.440362000  | 3.233889000  | 2.810634000  |
| 1  | 7.284584000  | 4.153305000  | -0.746006000 |
| 1  | 4.711818000  | 5.283132000  | 0.207867000  |
| 1  | 7.451916000  | 5.432336000  | 1.601741000  |
| 1  | 6.113131000  | 6.504941000  | 1.985697000  |
| 1  | 4.150178000  | 5.714278000  | 3.232339000  |
| 1  | 3.238193000  | 4.065728000  | 4.838723000  |
| 1  | 4.363685000  | 1.859638000  | 5.141659000  |
| 1  | 6.423838000  | 1.341955000  | 3.844538000  |
| 1  | 7.351611000  | 3.007801000  | 2.264748000  |
| 6  | 3.522191000  | 5.694030000  | -5.162029000 |

|   |              |              |              |
|---|--------------|--------------|--------------|
| 6 | 1.991114000  | 5.746364000  | -4.973133000 |
| 6 | 1.210091000  | 4.700435000  | -5.786912000 |
| 6 | 4.172650000  | 4.400907000  | -4.639593000 |
| 1 | 3.757685000  | 5.816272000  | -6.229871000 |
| 1 | 1.762406000  | 5.624555000  | -3.902792000 |
| 1 | 1.634819000  | 6.749241000  | -5.248808000 |
| 1 | 1.383689000  | 4.834911000  | -6.862566000 |
| 1 | 1.515945000  | 3.678787000  | -5.527867000 |
| 1 | 0.133322000  | 4.778435000  | -5.600482000 |
| 1 | 5.264063000  | 4.436806000  | -4.748958000 |
| 1 | 3.815494000  | 3.521956000  | -5.188254000 |
| 1 | 3.941774000  | 4.246084000  | -3.577143000 |
| 6 | -1.988274000 | 5.491680000  | -2.495815000 |
| 6 | -1.127243000 | 4.732675000  | -1.452658000 |
| 6 | -0.275173000 | 3.598476000  | -2.053313000 |
| 6 | 0.843168000  | 3.124712000  | -1.115973000 |
| 7 | 0.300032000  | 2.666603000  | 0.172775000  |
| 6 | 1.012898000  | 2.617192000  | 1.303767000  |
| 7 | 2.351084000  | 2.835481000  | 1.295972000  |
| 7 | 0.388438000  | 2.365282000  | 2.470927000  |
| 6 | -2.721739000 | 4.618373000  | -3.505386000 |
| 8 | -2.260232000 | 4.477989000  | -4.676573000 |
| 1 | -1.338565000 | 6.133983000  | -3.097987000 |
| 1 | -1.758085000 | 4.319255000  | -0.660140000 |
| 1 | -0.469701000 | 5.472002000  | -0.971923000 |
| 1 | -0.920499000 | 2.749822000  | -2.311599000 |
| 1 | 0.191213000  | 3.931562000  | -2.988973000 |
| 1 | 1.412690000  | 2.318424000  | -1.597289000 |
| 1 | 1.543429000  | 3.950119000  | -0.934264000 |
| 1 | -0.703885000 | 2.361816000  | 0.211658000  |
| 1 | 2.902330000  | 2.910078000  | 0.443854000  |
| 1 | 2.844899000  | 2.970740000  | 2.165229000  |
| 1 | -0.659863000 | 2.322028000  | 2.529790000  |
| 1 | 0.930753000  | 2.150756000  | 3.291903000  |
| 7 | -3.884518000 | 4.022246000  | -3.132933000 |
| 6 | -4.694184000 | 3.259649000  | -4.113737000 |
| 6 | -6.049045000 | 3.093635000  | -3.406513000 |
| 6 | -5.662839000 | 3.022984000  | -1.913061000 |
| 6 | -4.493184000 | 4.020965000  | -1.777278000 |
| 1 | -4.223490000 | 2.291197000  | -4.319669000 |
| 1 | -6.687461000 | 3.965654000  | -3.597027000 |
| 1 | -6.580736000 | 2.199644000  | -3.742549000 |
| 1 | -6.492812000 | 3.266896000  | -1.243110000 |
| 1 | -5.313928000 | 2.013052000  | -1.668593000 |
| 1 | -3.774442000 | 3.687835000  | -1.025388000 |
| 1 | -4.850155000 | 5.027327000  | -1.516590000 |
| 6 | 0.172304000  | -0.872272000 | -7.745697000 |
| 6 | -1.090210000 | -0.038774000 | -7.691932000 |
| 6 | -2.270961000 | -0.480158000 | -8.314164000 |
| 6 | -3.447227000 | 0.274434000  | -8.238118000 |

|   |              |              |              |
|---|--------------|--------------|--------------|
| 6 | -3.461890000 | 1.485179000  | -7.533602000 |
| 6 | -2.294263000 | 1.942394000  | -6.906720000 |
| 6 | -1.120282000 | 1.182603000  | -6.994647000 |
| 1 | 1.068716000  | -0.244186000 | -7.697462000 |
| 1 | 0.219911000  | -1.576094000 | -6.903146000 |
| 1 | -2.266325000 | -1.418844000 | -8.861806000 |
| 1 | -4.346687000 | -0.079599000 | -8.733635000 |
| 1 | -4.371846000 | 2.075955000  | -7.483257000 |
| 1 | -2.296545000 | 2.873849000  | -6.347016000 |
| 1 | -0.212639000 | 1.550646000  | -6.522163000 |
| 6 | -4.131501000 | -3.863701000 | 2.144373000  |
| 6 | -2.816218000 | -3.533513000 | 1.860548000  |
| 6 | -1.690795000 | -3.849150000 | 2.712952000  |
| 6 | -0.580854000 | -3.301233000 | 2.135056000  |
| 6 | -1.011946000 | -2.649497000 | 0.917068000  |
| 7 | -2.377027000 | -2.814554000 | 0.761976000  |
| 6 | -0.175601000 | -1.966222000 | 0.047027000  |
| 6 | -0.582028000 | -1.366493000 | -1.134219000 |
| 6 | 0.309400000  | -0.752213000 | -2.092969000 |
| 6 | -0.449231000 | -0.368918000 | -3.164262000 |
| 6 | -1.816848000 | -0.735924000 | -2.871831000 |
| 7 | -1.882265000 | -1.326135000 | -1.616651000 |
| 6 | -2.880947000 | -0.548628000 | -3.739014000 |
| 6 | -4.193309000 | -0.904659000 | -3.464072000 |
| 6 | -5.311382000 | -0.651737000 | -4.344846000 |
| 6 | -6.439615000 | -1.073379000 | -3.694598000 |
| 6 | -6.024820000 | -1.602318000 | -2.414841000 |
| 7 | -4.645279000 | -1.504846000 | -2.297966000 |
| 6 | -6.884139000 | -2.134627000 | -1.465185000 |
| 6 | -6.484565000 | -2.698523000 | -0.263811000 |
| 6 | -7.375654000 | -3.332934000 | 0.686090000  |
| 6 | -6.598580000 | -3.837369000 | 1.689390000  |
| 6 | -5.224465000 | -3.509492000 | 1.370707000  |
| 7 | -5.179406000 | -2.806561000 | 0.180939000  |
| 1 | -4.322145000 | -4.414145000 | 3.057943000  |
| 1 | 0.879615000  | -1.922899000 | 0.294598000  |
| 1 | -2.674121000 | -0.082643000 | -4.695903000 |
| 1 | -7.944395000 | -2.136465000 | -1.693779000 |
| 8 | -2.301877000 | 2.185462000  | 2.586335000  |
| 6 | -2.900241000 | 1.877091000  | 1.485497000  |
| 8 | -2.337835000 | 1.941976000  | 0.304533000  |
| 6 | -4.299121000 | 1.416645000  | 1.531781000  |
| 6 | -5.045962000 | 1.261356000  | 2.826718000  |
| 1 | -3.121502000 | 0.223819000  | -0.131900000 |
| 1 | -4.875154000 | 1.524176000  | 0.622880000  |
| 1 | -4.802010000 | 2.152210000  | 3.430108000  |
| 8 | -3.779665000 | -0.447221000 | 0.191747000  |
| 1 | 0.223062000  | -1.464813000 | -8.665602000 |
| 1 | 3.973629000  | 6.554840000  | -4.646968000 |
| 1 | -4.747184000 | 3.813870000  | -5.054649000 |

|   |              |              |              |
|---|--------------|--------------|--------------|
| 1 | -2.700190000 | 6.139339000  | -1.967723000 |
| 1 | 7.074402000  | 2.435879000  | -2.251258000 |
| 1 | 6.069465000  | 6.260880000  | -0.374720000 |
| 1 | -6.908061000 | -4.382840000 | 2.568731000  |
| 1 | -1.762119000 | -4.405732000 | 3.635762000  |
| 1 | -7.462907000 | -1.043774000 | -4.040522000 |
| 1 | -8.449103000 | -3.388303000 | 0.575894000  |
| 1 | 0.440467000  | -3.326289000 | 2.486907000  |
| 1 | 1.377599000  | -0.657348000 | -1.958993000 |
| 1 | -5.220996000 | -0.212201000 | -5.327667000 |
| 1 | -0.133066000 | 0.108061000  | -4.080401000 |
| 6 | -4.781887000 | 0.040679000  | 3.711599000  |
| 6 | -3.519137000 | -0.200820000 | 4.280808000  |
| 6 | -5.847096000 | -0.808660000 | 4.050755000  |
| 6 | -3.334659000 | -1.265081000 | 5.169072000  |
| 1 | -2.699024000 | 0.460798000  | 4.026389000  |
| 6 | -5.664213000 | -1.869912000 | 4.945792000  |
| 1 | -6.827341000 | -0.636116000 | 3.615218000  |
| 6 | -4.406023000 | -2.100545000 | 5.511282000  |
| 1 | -2.353302000 | -1.437400000 | 5.601858000  |
| 1 | -6.504517000 | -2.508851000 | 5.202269000  |
| 1 | -4.262416000 | -2.916899000 | 6.213502000  |
| 1 | -6.119869000 | 1.296423000  | 2.615183000  |

<sup>4</sup>ProH, alpha, S1

|    |              |              |              |
|----|--------------|--------------|--------------|
| 26 | -2.445461000 | -2.715986000 | -1.623812000 |
| 16 | -2.571049000 | -4.431842000 | -3.435923000 |
| 1  | -2.569827000 | -3.548292000 | -4.499792000 |
| 6  | 5.494413000  | 1.239860000  | 1.078394000  |
| 6  | 4.898098000  | 0.172765000  | 2.030627000  |
| 6  | 3.360178000  | 0.234323000  | 2.202784000  |
| 6  | 2.615649000  | -0.184458000 | 0.919994000  |
| 6  | 2.924046000  | -0.648660000 | 3.388750000  |
| 6  | 5.359994000  | 2.672686000  | 1.571409000  |
| 8  | 4.704188000  | 3.540478000  | 0.933439000  |
| 1  | 5.006103000  | 1.198236000  | 0.102704000  |
| 1  | 5.171846000  | -0.820086000 | 1.646479000  |
| 1  | 5.376211000  | 0.256051000  | 3.019007000  |
| 1  | 3.083598000  | 1.274993000  | 2.434778000  |
| 1  | 1.535577000  | -0.041109000 | 1.024872000  |
| 1  | 2.932330000  | 0.400351000  | 0.049279000  |
| 1  | 2.796115000  | -1.244790000 | 0.698551000  |
| 1  | 1.838564000  | -0.611022000 | 3.528894000  |
| 1  | 3.401331000  | -0.330324000 | 4.325477000  |
| 1  | 3.200948000  | -1.696843000 | 3.212887000  |
| 7  | 6.015837000  | 2.974918000  | 2.729919000  |
| 6  | 6.097753000  | 4.321805000  | 3.302887000  |
| 6  | 5.515114000  | 4.434294000  | 4.734196000  |
| 6  | 4.000806000  | 4.422419000  | 4.825409000  |
| 6  | 3.283963000  | 5.633981000  | 4.824038000  |

|   |              |             |              |
|---|--------------|-------------|--------------|
| 6 | 1.888563000  | 5.644999000 | 4.943896000  |
| 6 | 1.185474000  | 4.437222000 | 5.061273000  |
| 6 | 1.884849000  | 3.223077000 | 5.046614000  |
| 6 | 3.280590000  | 3.219968000 | 4.934708000  |
| 1 | 6.542073000  | 2.240928000 | 3.183998000  |
| 1 | 5.572094000  | 4.987985000 | 2.615384000  |
| 1 | 5.933531000  | 3.626151000 | 5.349652000  |
| 1 | 5.892652000  | 5.371956000 | 5.161773000  |
| 1 | 3.824811000  | 6.574393000 | 4.756817000  |
| 1 | 1.356337000  | 6.591066000 | 4.973306000  |
| 1 | 0.106977000  | 4.442892000 | 5.192212000  |
| 1 | 1.344574000  | 2.285385000 | 5.128927000  |
| 1 | 3.815861000  | 2.275586000 | 4.945958000  |
| 6 | 3.068922000  | 3.612886000 | -8.350064000 |
| 6 | 2.050811000  | 3.755656000 | -7.198558000 |
| 6 | 0.859258000  | 2.785893000 | -7.280932000 |
| 6 | 3.818841000  | 2.270031000 | -8.361813000 |
| 1 | 2.544543000  | 3.747257000 | -9.307965000 |
| 1 | 2.574271000  | 3.614256000 | -6.239632000 |
| 1 | 1.671279000  | 4.788206000 | -7.191335000 |
| 1 | 0.322793000  | 2.909239000 | -8.230998000 |
| 1 | 1.185219000  | 1.740453000 | -7.220065000 |
| 1 | 0.146590000  | 2.961844000 | -6.467111000 |
| 1 | 4.555089000  | 2.235629000 | -9.173691000 |
| 1 | 3.134117000  | 1.425838000 | -8.500222000 |
| 1 | 4.355333000  | 2.113073000 | -7.416762000 |
| 6 | -0.441092000 | 5.232819000 | -3.648604000 |
| 6 | 0.528168000  | 4.953047000 | -2.471115000 |
| 6 | 1.228465000  | 3.584805000 | -2.533989000 |
| 6 | 2.004143000  | 3.265190000 | -1.240529000 |
| 7 | 1.078442000  | 3.104621000 | -0.109237000 |
| 6 | 1.060958000  | 3.832163000 | 1.015205000  |
| 7 | 2.136132000  | 4.557624000 | 1.409843000  |
| 7 | -0.061985000 | 3.847406000 | 1.760866000  |
| 6 | -1.588321000 | 4.235763000 | -3.741842000 |
| 8 | -1.517599000 | 3.243953000 | -4.530667000 |
| 1 | 0.102931000  | 5.167713000 | -4.595801000 |
| 1 | -0.019209000 | 5.021428000 | -1.522961000 |
| 1 | 1.285001000  | 5.750285000 | -2.452931000 |
| 1 | 0.495447000  | 2.789668000 | -2.715259000 |
| 1 | 1.929809000  | 3.559884000 | -3.379641000 |
| 1 | 2.575814000  | 2.339178000 | -1.368471000 |
| 1 | 2.722454000  | 4.058145000 | -1.015960000 |
| 1 | 0.355756000  | 2.345750000 | -0.172404000 |
| 1 | 3.079481000  | 4.297592000 | 1.119883000  |
| 1 | 2.049524000  | 5.171153000 | 2.205896000  |
| 1 | -0.943999000 | 3.410409000 | 1.413095000  |
| 1 | -0.004899000 | 4.121946000 | 2.729514000  |
| 7 | -2.673656000 | 4.424528000 | -2.947988000 |
| 6 | -3.814482000 | 3.470888000 | -2.979119000 |

|   |              |              |              |
|---|--------------|--------------|--------------|
| 6 | -4.868707000 | 4.127707000  | -2.070298000 |
| 6 | -4.024602000 | 4.953881000  | -1.074961000 |
| 6 | -2.885949000 | 5.506315000  | -1.953946000 |
| 1 | -3.487347000 | 2.500544000  | -2.592062000 |
| 1 | -5.523156000 | 4.784976000  | -2.656848000 |
| 1 | -5.497469000 | 3.384000000  | -1.573339000 |
| 1 | -4.593439000 | 5.752105000  | -0.588374000 |
| 1 | -3.608779000 | 4.296123000  | -0.302724000 |
| 1 | -1.979007000 | 5.702030000  | -1.378812000 |
| 1 | -3.183675000 | 6.437170000  | -2.458739000 |
| 6 | -5.890282000 | -0.417691000 | -7.963829000 |
| 6 | -5.548845000 | 1.045995000  | -7.784602000 |
| 6 | -6.433346000 | 2.056483000  | -8.196300000 |
| 6 | -6.112534000 | 3.408871000  | -8.023076000 |
| 6 | -4.898969000 | 3.772843000  | -7.429970000 |
| 6 | -4.003898000 | 2.777290000  | -7.012879000 |
| 6 | -4.329840000 | 1.427970000  | -7.193132000 |
| 1 | -5.898224000 | -0.945675000 | -7.001851000 |
| 1 | -6.875041000 | -0.544641000 | -8.424857000 |
| 1 | -7.378866000 | 1.780855000  | -8.655830000 |
| 1 | -6.810309000 | 4.174000000  | -8.351079000 |
| 1 | -4.649022000 | 4.820985000  | -7.295445000 |
| 1 | -3.063710000 | 3.044441000  | -6.539977000 |
| 1 | -3.630699000 | 0.660050000  | -6.872309000 |
| 6 | -2.325330000 | -5.073631000 | 0.878247000  |
| 6 | -1.120062000 | -4.656886000 | 0.332661000  |
| 6 | 0.173235000  | -5.198975000 | 0.686606000  |
| 6 | 1.101548000  | -4.569075000 | -0.094395000 |
| 6 | 0.388846000  | -3.624542000 | -0.925792000 |
| 7 | -0.970565000 | -3.691915000 | -0.652302000 |
| 6 | 0.989767000  | -2.756095000 | -1.824997000 |
| 6 | 0.318803000  | -1.796965000 | -2.569468000 |
| 6 | 0.954748000  | -0.818834000 | -3.423955000 |
| 6 | -0.032316000 | -0.016465000 | -3.926720000 |
| 6 | -1.286137000 | -0.510377000 | -3.402726000 |
| 7 | -1.055440000 | -1.595922000 | -2.568513000 |
| 6 | -2.528326000 | 0.007182000  | -3.738145000 |
| 6 | -3.741868000 | -0.503641000 | -3.296553000 |
| 6 | -5.039625000 | -0.019895000 | -3.714063000 |
| 6 | -5.978613000 | -0.786194000 | -3.078631000 |
| 6 | -5.268540000 | -1.738371000 | -2.255837000 |
| 7 | -3.899320000 | -1.557691000 | -2.404734000 |
| 6 | -5.872392000 | -2.659905000 | -1.413372000 |
| 6 | -5.193696000 | -3.531544000 | -0.575991000 |
| 6 | -5.827976000 | -4.441134000 | 0.352363000  |
| 6 | -4.830638000 | -5.100583000 | 1.014679000  |
| 6 | -3.574584000 | -4.611183000 | 0.490484000  |
| 7 | -3.813856000 | -3.646985000 | -0.476957000 |
| 1 | -2.290788000 | -5.842271000 | 1.642889000  |
| 1 | 2.067615000  | -2.811680000 | -1.932862000 |



|   |              |              |              |
|---|--------------|--------------|--------------|
| 1 | -2.541414000 | 0.874432000  | -4.388843000 |
| 1 | -6.956583000 | -2.685623000 | -1.392691000 |
| 8 | -2.303311000 | 2.501690000  | 0.892985000  |
| 6 | -1.903239000 | 1.358951000  | 0.472967000  |
| 8 | -0.723650000 | 1.098872000  | 0.011677000  |
| 6 | -2.869780000 | 0.164780000  | 0.520595000  |
| 6 | -3.556676000 | 0.005977000  | 1.892227000  |
| 1 | -1.210424000 | -0.732593000 | -0.043137000 |
| 1 | -3.646478000 | 0.315281000  | -0.240107000 |
| 1 | -4.221032000 | 0.866869000  | 2.020709000  |
| 8 | -2.127522000 | -1.040099000 | 0.174826000  |
| 1 | -5.155012000 | -0.925162000 | -8.600986000 |
| 1 | 3.801084000  | 4.430791000  | -8.282501000 |
| 1 | -4.152095000 | 3.327108000  | -4.008901000 |
| 1 | -0.829156000 | 6.255100000  | -3.558984000 |
| 1 | 6.560702000  | 1.025736000  | 0.917948000  |
| 1 | 7.151943000  | 4.627811000  | 3.327267000  |
| 1 | -4.921963000 | -5.856548000 | 1.781229000  |
| 1 | 0.332877000  | -5.968693000 | 1.427990000  |
| 1 | -7.054784000 | -0.720312000 | -3.149677000 |
| 1 | -6.896383000 | -4.548080000 | 0.472133000  |
| 1 | 2.171380000  | -4.719094000 | -0.116165000 |
| 1 | 2.019391000  | -0.760862000 | -3.599655000 |
| 1 | -5.194292000 | 0.784884000  | -4.417898000 |
| 1 | 0.050048000  | 0.835094000  | -4.586153000 |
| 6 | -2.614714000 | -0.091754000 | 3.075555000  |
| 6 | -2.439001000 | 1.003537000  | 3.939866000  |
| 6 | -1.904506000 | -1.277218000 | 3.341410000  |
| 6 | -1.589708000 | 0.915999000  | 5.049338000  |
| 1 | -2.973225000 | 1.925788000  | 3.733250000  |
| 6 | -1.049191000 | -1.364108000 | 4.445736000  |
| 1 | -2.024919000 | -2.124931000 | 2.676085000  |
| 6 | -0.891541000 | -0.270240000 | 5.307763000  |
| 1 | -1.488556000 | 1.764399000  | 5.721519000  |
| 1 | -0.515675000 | -2.289881000 | 4.640616000  |
| 1 | -0.245025000 | -0.348080000 | 6.177276000  |
| 1 | -4.181847000 | -0.892911000 | 1.833626000  |

<sup>4</sup>TS<sub>DS,alpha,S1</sub>

|    |              |              |              |
|----|--------------|--------------|--------------|
| 26 | -4.060472000 | -2.627071000 | -1.773193000 |
| 16 | -3.478603000 | -3.946116000 | -3.660892000 |
| 1  | -2.453542000 | -4.668454000 | -3.080456000 |
| 6  | 6.706428000  | 2.000410000  | 1.385100000  |
| 6  | 5.851847000  | 1.089267000  | 2.312970000  |
| 6  | 4.392691000  | 0.867405000  | 1.848458000  |
| 6  | 4.309576000  | -0.022086000 | 0.592047000  |
| 6  | 3.543774000  | 0.260073000  | 2.982721000  |
| 6  | 6.329444000  | 3.468006000  | 1.473457000  |
| 8  | 5.427430000  | 3.978651000  | 0.753548000  |
| 1  | 6.580692000  | 1.692828000  | 0.343445000  |

|   |              |              |              |
|---|--------------|--------------|--------------|
| 1 | 6.354332000  | 0.114318000  | 2.387198000  |
| 1 | 5.853114000  | 1.517305000  | 3.326442000  |
| 1 | 3.963689000  | 1.845635000  | 1.596442000  |
| 1 | 3.263806000  | -0.149985000 | 0.292197000  |
| 1 | 4.855755000  | 0.406956000  | -0.256950000 |
| 1 | 4.730097000  | -1.016982000 | 0.794078000  |
| 1 | 2.508936000  | 0.131433000  | 2.647473000  |
| 1 | 3.542421000  | 0.905507000  | 3.871087000  |
| 1 | 3.930967000  | -0.723652000 | 3.281656000  |
| 7 | 7.017716000  | 4.207104000  | 2.393614000  |
| 6 | 6.841511000  | 5.648965000  | 2.589160000  |
| 6 | 6.369466000  | 6.039989000  | 4.012121000  |
| 6 | 4.920755000  | 5.720614000  | 4.328142000  |
| 6 | 3.915754000  | 6.678163000  | 4.093003000  |
| 6 | 2.577286000  | 6.410682000  | 4.408227000  |
| 6 | 2.220616000  | 5.171679000  | 4.960605000  |
| 6 | 3.210143000  | 4.206809000  | 5.189973000  |
| 6 | 4.547073000  | 4.482433000  | 4.879087000  |
| 1 | 7.749713000  | 3.749806000  | 2.919474000  |
| 1 | 6.124095000  | 5.982758000  | 1.836169000  |
| 1 | 7.027391000  | 5.557055000  | 4.747386000  |
| 1 | 6.531613000  | 7.120330000  | 4.118096000  |
| 1 | 4.187746000  | 7.648509000  | 3.685799000  |
| 1 | 1.821943000  | 7.174564000  | 4.249496000  |
| 1 | 1.189592000  | 4.973543000  | 5.239118000  |
| 1 | 2.944160000  | 3.248433000  | 5.624343000  |
| 1 | 5.309028000  | 3.735380000  | 5.080190000  |
| 6 | 3.415358000  | 2.153878000  | -7.718425000 |
| 6 | 2.443579000  | 2.486203000  | -6.565743000 |
| 6 | 1.225703000  | 3.327419000  | -6.984262000 |
| 6 | 2.818648000  | 1.230978000  | -8.794385000 |
| 1 | 3.750817000  | 3.092381000  | -8.185749000 |
| 1 | 2.099483000  | 1.548102000  | -6.104855000 |
| 1 | 2.998774000  | 3.025734000  | -5.783192000 |
| 1 | 1.545535000  | 4.273155000  | -7.443209000 |
| 1 | 0.604556000  | 2.799479000  | -7.717690000 |
| 1 | 0.590985000  | 3.562443000  | -6.122526000 |
| 1 | 3.559173000  | 0.995452000  | -9.568237000 |
| 1 | 1.957019000  | 1.692000000  | -9.290330000 |
| 1 | 2.481811000  | 0.283729000  | -8.353947000 |
| 6 | 0.196741000  | 5.644747000  | -3.005310000 |
| 6 | 1.249671000  | 5.095922000  | -2.007808000 |
| 6 | 1.812303000  | 3.708653000  | -2.364812000 |
| 6 | 2.698921000  | 3.114625000  | -1.248597000 |
| 7 | 1.932581000  | 2.862833000  | -0.016054000 |
| 6 | 1.825027000  | 3.692717000  | 1.030403000  |
| 7 | 2.748711000  | 4.653803000  | 1.277077000  |
| 7 | 0.761857000  | 3.560243000  | 1.848994000  |
| 6 | -0.995789000 | 4.718575000  | -3.207948000 |
| 8 | -1.034755000 | 3.939867000  | -4.206734000 |

|   |              |              |              |
|---|--------------|--------------|--------------|
| 1 | 0.652943000  | 5.770205000  | -3.991676000 |
| 1 | 0.804529000  | 5.048906000  | -1.007507000 |
| 1 | 2.073227000  | 5.821078000  | -1.945230000 |
| 1 | 0.989712000  | 3.013501000  | -2.571627000 |
| 1 | 2.405908000  | 3.769327000  | -3.287738000 |
| 1 | 3.104853000  | 2.151407000  | -1.573548000 |
| 1 | 3.555900000  | 3.759853000  | -1.038437000 |
| 1 | 1.389470000  | 1.966635000  | 0.056929000  |
| 1 | 3.710893000  | 4.546593000  | 0.955510000  |
| 1 | 2.580786000  | 5.323643000  | 2.012817000  |
| 1 | -0.027983000 | 2.930267000  | 1.576570000  |
| 1 | 0.794065000  | 3.954128000  | 2.776761000  |
| 7 | -1.994284000 | 4.724299000  | -2.286082000 |
| 6 | -3.156766000 | 3.803152000  | -2.420611000 |
| 6 | -4.093073000 | 4.223530000  | -1.273949000 |
| 6 | -3.127139000 | 4.785744000  | -0.208306000 |
| 6 | -2.077749000 | 5.538518000  | -1.049145000 |
| 1 | -2.812987000 | 2.770297000  | -2.307941000 |
| 1 | -4.788321000 | 5.003617000  | -1.609445000 |
| 1 | -4.685296000 | 3.382627000  | -0.903154000 |
| 1 | -3.619709000 | 5.438282000  | 0.519079000  |
| 1 | -2.646668000 | 3.960310000  | 0.330850000  |
| 1 | -1.111561000 | 5.599310000  | -0.544490000 |
| 1 | -2.411429000 | 6.560496000  | -1.282550000 |
| 6 | -4.207479000 | -0.063048000 | -8.412458000 |
| 6 | -4.353816000 | 1.331808000  | -7.844243000 |
| 6 | -5.559051000 | 2.044512000  | -7.969424000 |
| 6 | -5.700617000 | 3.322790000  | -7.413910000 |
| 6 | -4.636037000 | 3.909997000  | -6.720609000 |
| 6 | -3.425599000 | 3.215299000  | -6.588109000 |
| 6 | -3.290736000 | 1.939749000  | -7.150553000 |
| 1 | -4.989448000 | -0.280044000 | -9.147424000 |
| 1 | -3.235927000 | -0.196903000 | -8.901660000 |
| 1 | -6.388356000 | 1.595865000  | -8.510104000 |
| 1 | -6.639137000 | 3.857949000  | -7.526882000 |
| 1 | -4.744418000 | 4.902117000  | -6.292483000 |
| 1 | -2.594987000 | 3.649563000  | -6.039771000 |
| 1 | -2.348747000 | 1.407358000  | -7.047324000 |
| 6 | -4.025505000 | -5.460987000 | 0.193052000  |
| 6 | -2.846750000 | -4.733249000 | 0.100250000  |
| 6 | -1.602352000 | -5.047085000 | 0.782073000  |
| 6 | -0.722891000 | -4.033521000 | 0.513754000  |
| 6 | -1.408643000 | -3.083183000 | -0.351752000 |
| 7 | -2.672704000 | -3.535605000 | -0.598430000 |
| 6 | -0.863735000 | -1.841797000 | -0.786642000 |
| 6 | -1.403755000 | -1.011189000 | -1.807336000 |
| 6 | -0.726291000 | 0.103804000  | -2.465795000 |
| 6 | -1.597462000 | 0.617662000  | -3.388771000 |
| 6 | -2.827626000 | -0.164363000 | -3.286973000 |
| 7 | -2.648600000 | -1.150080000 | -2.326013000 |

|   |              |              |              |
|---|--------------|--------------|--------------|
| 6 | -4.016886000 | 0.045648000  | -3.966310000 |
| 6 | -5.230636000 | -0.656530000 | -3.805707000 |
| 6 | -6.453606000 | -0.365065000 | -4.528838000 |
| 6 | -7.401551000 | -1.258633000 | -4.101713000 |
| 6 | -6.774552000 | -2.118189000 | -3.116949000 |
| 7 | -5.456560000 | -1.711930000 | -2.946690000 |
| 6 | -7.391153000 | -3.200757000 | -2.480930000 |
| 6 | -6.815033000 | -4.115164000 | -1.596847000 |
| 6 | -7.453478000 | -5.279846000 | -1.004952000 |
| 6 | -6.499421000 | -5.924178000 | -0.260353000 |
| 6 | -5.270503000 | -5.155591000 | -0.386394000 |
| 7 | -5.499171000 | -4.070289000 | -1.188221000 |
| 1 | -3.984289000 | -6.361682000 | 0.798874000  |
| 1 | 0.179785000  | -1.665312000 | -0.550252000 |
| 1 | -4.028700000 | 0.849100000  | -4.696534000 |
| 1 | -8.434435000 | -3.366015000 | -2.735132000 |
| 8 | -1.145886000 | 1.750623000  | 1.110740000  |
| 6 | -0.560179000 | 0.624496000  | 0.881982000  |
| 8 | 0.660477000  | 0.506519000  | 0.464338000  |
| 6 | -1.311716000 | -0.636063000 | 1.222616000  |
| 6 | -2.705662000 | -0.616901000 | 1.580006000  |
| 1 | -5.095451000 | -0.761543000 | -0.499104000 |
| 1 | -0.682760000 | -1.424991000 | 1.622674000  |
| 1 | -3.048988000 | 0.426026000  | 1.639773000  |
| 8 | -4.492717000 | -1.491125000 | -0.240007000 |
| 1 | -4.277358000 | -0.821940000 | -7.621743000 |
| 1 | 4.315198000  | 1.679092000  | -7.300322000 |
| 1 | -3.603087000 | 3.902228000  | -3.413614000 |
| 1 | -0.136899000 | 6.633192000  | -2.664300000 |
| 1 | 7.767952000  | 1.878041000  | 1.636596000  |
| 1 | 7.797757000  | 6.148661000  | 2.386664000  |
| 1 | -6.610197000 | -6.832647000 | 0.314446000  |
| 1 | -1.440487000 | -5.921345000 | 1.396273000  |
| 1 | -8.428730000 | -1.342195000 | -4.426849000 |
| 1 | -8.485659000 | -5.565679000 | -1.149553000 |
| 1 | 0.295100000  | -3.927561000 | 0.861855000  |
| 1 | 0.271893000  | 0.437467000  | -2.228081000 |
| 1 | -6.556840000 | 0.417558000  | -5.267030000 |
| 1 | -1.444203000 | 1.467339000  | -4.039746000 |
| 6 | -3.100268000 | -1.435242000 | 2.798945000  |
| 6 | -2.331200000 | -1.374020000 | 3.978280000  |
| 6 | -4.257676000 | -2.236050000 | 2.796198000  |
| 6 | -2.703340000 | -2.091710000 | 5.119851000  |
| 1 | -1.444339000 | -0.745663000 | 4.003510000  |
| 6 | -4.631173000 | -2.950718000 | 3.939875000  |
| 1 | -4.841164000 | -2.300582000 | 1.883495000  |
| 6 | -3.857445000 | -2.883781000 | 5.104884000  |
| 1 | -2.097535000 | -2.027808000 | 6.019592000  |
| 1 | -5.525788000 | -3.566371000 | 3.917209000  |
| 1 | -4.149636000 | -3.441020000 | 5.990178000  |

|   |              |              |             |
|---|--------------|--------------|-------------|
| 1 | -3.421588000 | -1.016671000 | 0.674249000 |
|---|--------------|--------------|-------------|

<sup>4</sup>Pr<sub>DS,α,S1</sub>

|    |              |              |              |
|----|--------------|--------------|--------------|
| 26 | -3.709558000 | -3.321237000 | -1.666337000 |
| 16 | -2.780377000 | -4.561184000 | -3.361855000 |
| 1  | -2.547313000 | -5.719682000 | -2.644802000 |
| 6  | 6.014899000  | 1.318900000  | 0.763406000  |
| 6  | 5.106956000  | 0.530124000  | 1.747615000  |
| 6  | 3.608550000  | 0.918662000  | 1.722345000  |
| 6  | 2.924393000  | 0.513754000  | 0.401539000  |
| 6  | 2.874511000  | 0.284221000  | 2.920608000  |
| 6  | 6.188348000  | 2.780431000  | 1.138717000  |
| 8  | 5.492117000  | 3.696436000  | 0.624149000  |
| 1  | 5.592799000  | 1.291030000  | -0.243867000 |
| 1  | 5.199220000  | -0.539281000 | 1.509599000  |
| 1  | 5.497653000  | 0.655391000  | 2.768603000  |
| 1  | 3.537349000  | 2.010827000  | 1.824750000  |
| 1  | 1.878341000  | 0.839713000  | 0.388418000  |
| 1  | 3.415840000  | 0.960378000  | -0.470348000 |
| 1  | 2.949416000  | -0.578134000 | 0.277056000  |
| 1  | 1.816377000  | 0.567761000  | 2.919634000  |
| 1  | 3.312600000  | 0.603587000  | 3.875175000  |
| 1  | 2.928480000  | -0.811991000 | 2.876780000  |
| 7  | 7.144573000  | 3.042721000  | 2.080058000  |
| 6  | 7.502986000  | 4.388655000  | 2.534287000  |
| 6  | 7.316927000  | 4.607071000  | 4.056603000  |
| 6  | 5.877916000  | 4.722307000  | 4.521738000  |
| 6  | 5.248301000  | 5.980295000  | 4.573882000  |
| 6  | 3.927119000  | 6.106874000  | 5.021271000  |
| 6  | 3.209239000  | 4.969885000  | 5.420610000  |
| 6  | 3.822152000  | 3.711392000  | 5.365764000  |
| 6  | 5.145323000  | 3.592141000  | 4.923653000  |
| 1  | 7.693063000  | 2.268706000  | 2.428804000  |
| 1  | 6.885892000  | 5.086211000  | 1.963673000  |
| 1  | 7.819597000  | 3.791811000  | 4.594605000  |
| 1  | 7.856287000  | 5.526421000  | 4.318446000  |
| 1  | 5.804156000  | 6.868115000  | 4.284064000  |
| 1  | 3.468345000  | 7.089195000  | 5.080117000  |
| 1  | 2.195233000  | 5.068328000  | 5.796841000  |
| 1  | 3.276824000  | 2.827322000  | 5.679944000  |
| 1  | 5.617627000  | 2.614618000  | 4.903706000  |
| 6  | 3.355330000  | 3.864243000  | -7.879432000 |
| 6  | 2.336028000  | 4.055964000  | -6.736044000 |
| 6  | 1.319917000  | 2.910294000  | -6.589438000 |
| 6  | 4.314048000  | 2.679102000  | -7.673398000 |
| 1  | 2.809031000  | 3.732077000  | -8.825383000 |
| 1  | 2.883332000  | 4.184941000  | -5.788643000 |
| 1  | 1.791160000  | 4.996421000  | -6.905496000 |
| 1  | 0.767062000  | 2.761644000  | -7.526648000 |
| 1  | 1.812852000  | 1.962592000  | -6.341683000 |

|   |              |              |              |
|---|--------------|--------------|--------------|
| 1 | 0.592138000  | 3.126106000  | -5.799493000 |
| 1 | 5.039141000  | 2.609533000  | -8.493204000 |
| 1 | 3.774147000  | 1.726727000  | -7.626818000 |
| 1 | 4.876903000  | 2.789422000  | -6.737069000 |
| 6 | -0.296201000 | 5.833295000  | -3.330984000 |
| 6 | 0.761609000  | 5.699050000  | -2.205495000 |
| 6 | 1.616454000  | 4.421913000  | -2.287300000 |
| 6 | 2.551841000  | 4.270989000  | -1.073698000 |
| 7 | 1.760810000  | 4.008395000  | 0.137985000  |
| 6 | 2.028839000  | 4.480359000  | 1.359170000  |
| 7 | 3.231071000  | 5.049795000  | 1.639989000  |
| 7 | 1.085093000  | 4.396403000  | 2.317795000  |
| 6 | -1.324158000 | 4.710485000  | -3.328165000 |
| 8 | -1.181296000 | 3.703323000  | -4.083038000 |
| 1 | 0.198928000  | 5.795476000  | -4.306103000 |
| 1 | 0.268234000  | 5.728725000  | -1.225910000 |
| 1 | 1.420133000  | 6.578800000  | -2.249623000 |
| 1 | 0.970110000  | 3.538769000  | -2.358679000 |
| 1 | 2.226328000  | 4.438606000  | -3.200458000 |
| 1 | 3.269982000  | 3.459440000  | -1.241288000 |
| 1 | 3.134454000  | 5.188260000  | -0.926435000 |
| 1 | 0.937469000  | 3.348605000  | 0.049794000  |
| 1 | 4.065443000  | 4.756477000  | 1.134239000  |
| 1 | 3.367351000  | 5.505798000  | 2.529682000  |
| 1 | 0.121196000  | 4.034327000  | 2.097958000  |
| 1 | 1.352179000  | 4.524291000  | 3.281557000  |
| 7 | -2.379210000 | 4.802097000  | -2.476111000 |
| 6 | -3.369776000 | 3.698633000  | -2.382399000 |
| 6 | -4.432464000 | 4.238772000  | -1.406472000 |
| 6 | -3.659384000 | 5.253409000  | -0.532789000 |
| 6 | -2.676869000 | 5.901817000  | -1.527130000 |
| 1 | -2.870185000 | 2.801751000  | -2.001328000 |
| 1 | -5.234013000 | 4.746124000  | -1.957988000 |
| 1 | -4.889624000 | 3.438237000  | -0.817807000 |
| 1 | -4.312891000 | 5.993132000  | -0.060146000 |
| 1 | -3.099135000 | 4.737390000  | 0.255855000  |
| 1 | -1.770439000 | 6.259506000  | -1.035202000 |
| 1 | -3.141293000 | 6.748245000  | -2.054345000 |
| 6 | -4.087370000 | -0.790940000 | -8.192058000 |
| 6 | -4.299504000 | 0.610567000  | -7.662090000 |
| 6 | -5.544980000 | 1.251654000  | -7.786800000 |
| 6 | -5.749818000 | 2.533728000  | -7.261737000 |
| 6 | -4.709034000 | 3.197721000  | -6.602033000 |
| 6 | -3.459510000 | 2.575582000  | -6.471804000 |
| 6 | -3.261931000 | 1.294481000  | -7.002213000 |
| 1 | -3.075683000 | -0.919157000 | -8.592172000 |
| 1 | -4.217053000 | -1.537267000 | -7.396611000 |
| 1 | -6.355259000 | 0.744256000  | -8.304202000 |
| 1 | -6.718377000 | 3.012900000  | -7.372793000 |
| 1 | -4.866090000 | 4.193727000  | -6.198535000 |

|   |              |              |              |
|---|--------------|--------------|--------------|
| 1 | -2.647609000 | 3.074427000  | -5.950871000 |
| 1 | -2.290947000 | 0.817396000  | -6.899972000 |
| 6 | -3.476754000 | -5.945680000 | 0.579333000  |
| 6 | -2.409071000 | -5.061612000 | 0.512776000  |
| 6 | -1.186959000 | -5.176490000 | 1.277099000  |
| 6 | -0.385088000 | -4.128767000 | 0.913610000  |
| 6 | -1.107212000 | -3.360289000 | -0.077348000 |
| 7 | -2.348834000 | -3.938847000 | -0.305156000 |
| 6 | -0.623871000 | -2.210175000 | -0.689011000 |
| 6 | -1.297949000 | -1.454725000 | -1.637182000 |
| 6 | -0.773161000 | -0.249068000 | -2.246934000 |
| 6 | -1.718145000 | 0.208579000  | -3.121145000 |
| 6 | -2.834513000 | -0.713889000 | -3.054590000 |
| 7 | -2.568983000 | -1.718322000 | -2.130036000 |
| 6 | -3.997166000 | -0.606808000 | -3.803042000 |
| 6 | -5.060084000 | -1.497394000 | -3.737381000 |
| 6 | -6.264905000 | -1.402350000 | -4.535519000 |
| 6 | -7.054991000 | -2.462667000 | -4.192367000 |
| 6 | -6.343292000 | -3.217922000 | -3.181003000 |
| 7 | -5.128281000 | -2.607827000 | -2.908376000 |
| 6 | -6.819779000 | -4.375544000 | -2.584482000 |
| 6 | -6.153335000 | -5.123496000 | -1.624129000 |
| 6 | -6.685000000 | -6.321935000 | -1.007009000 |
| 6 | -5.750562000 | -6.763631000 | -0.114079000 |
| 6 | -4.636492000 | -5.840688000 | -0.175230000 |
| 7 | -4.900307000 | -4.845154000 | -1.104054000 |
| 1 | -3.395474000 | -6.782850000 | 1.264655000  |
| 1 | 0.366559000  | -1.871958000 | -0.402376000 |
| 1 | -4.072699000 | 0.221021000  | -4.498918000 |
| 1 | -7.797208000 | -4.728675000 | -2.896920000 |
| 8 | -1.325948000 | 3.290874000  | 1.730960000  |
| 6 | -1.256721000 | 2.398758000  | 0.792894000  |
| 8 | -0.247121000 | 2.255000000  | -0.014818000 |
| 6 | -2.406105000 | 1.503918000  | 0.583037000  |
| 6 | -3.528227000 | 1.395460000  | 1.518737000  |
| 1 | -4.716282000 | -1.239689000 | -0.429138000 |
| 1 | -2.399761000 | 0.937008000  | -0.346549000 |
| 1 | -4.242601000 | 2.219187000  | 1.558063000  |
| 8 | -4.573550000 | -2.164453000 | -0.159173000 |
| 1 | -4.800490000 | -1.031486000 | -8.987728000 |
| 1 | 3.945116000  | 4.785992000  | -7.990723000 |
| 1 | -3.768698000 | 3.462322000  | -3.372861000 |
| 1 | -0.790607000 | 6.809035000  | -3.246962000 |
| 1 | 6.999890000  | 0.835243000  | 0.719520000  |
| 1 | 8.552841000  | 4.580513000  | 2.276390000  |
| 1 | -5.795955000 | -7.629100000 | 0.531368000  |
| 1 | -0.978603000 | -5.964279000 | 1.987025000  |
| 1 | -8.028699000 | -2.725897000 | -4.580205000 |
| 1 | -7.648213000 | -6.753922000 | -1.237862000 |
| 1 | 0.607184000  | -3.890526000 | 1.269357000  |

|   |              |              |              |
|---|--------------|--------------|--------------|
| 1 | 0.168796000  | 0.208807000  | -1.989051000 |
| 1 | -6.456025000 | -0.623286000 | -5.259663000 |
| 1 | -1.679796000 | 1.102824000  | -3.728000000 |
| 6 | -3.757558000 | 0.289192000  | 2.377271000  |
| 6 | -2.898241000 | -0.857803000 | 2.379547000  |
| 6 | -4.887186000 | 0.263427000  | 3.254247000  |
| 6 | -3.166947000 | -1.953109000 | 3.198180000  |
| 1 | -2.025030000 | -0.860771000 | 1.734744000  |
| 6 | -5.141860000 | -0.834650000 | 4.067453000  |
| 1 | -5.550919000 | 1.123157000  | 3.274977000  |
| 6 | -4.289802000 | -1.953451000 | 4.046331000  |
| 1 | -2.501251000 | -2.810779000 | 3.176719000  |
| 1 | -6.008392000 | -0.829588000 | 4.721672000  |
| 1 | -4.497599000 | -2.811393000 | 4.676928000  |
| 1 | -4.129184000 | -2.208452000 | 0.712365000  |

<sup>4</sup>TS1<sub>HA,beta,S1</sub>

|    |              |              |              |
|----|--------------|--------------|--------------|
| 26 | -4.547929000 | -2.673411000 | -2.076842000 |
| 16 | -5.280901000 | -4.468861000 | -3.513994000 |
| 1  | -5.997464000 | -5.177677000 | -2.568482000 |
| 6  | 6.547232000  | 4.256452000  | 0.529636000  |
| 6  | 6.421826000  | 2.857393000  | 1.192050000  |
| 6  | 4.984523000  | 2.286644000  | 1.267945000  |
| 6  | 4.414484000  | 1.961014000  | -0.126651000 |
| 6  | 4.963007000  | 1.030401000  | 2.161791000  |
| 6  | 5.898664000  | 5.370881000  | 1.333167000  |
| 8  | 4.777760000  | 5.857985000  | 1.026440000  |
| 1  | 6.073868000  | 4.252752000  | -0.454487000 |
| 1  | 7.050437000  | 2.156473000  | 0.624395000  |
| 1  | 6.847785000  | 2.902921000  | 2.205928000  |
| 1  | 4.339250000  | 3.044771000  | 1.736413000  |
| 1  | 3.384294000  | 1.595722000  | -0.058589000 |
| 1  | 4.399551000  | 2.839611000  | -0.781073000 |
| 1  | 5.018998000  | 1.185385000  | -0.616545000 |
| 1  | 3.946913000  | 0.629266000  | 2.243625000  |
| 1  | 5.327252000  | 1.250187000  | 3.173955000  |
| 1  | 5.599766000  | 0.241059000  | 1.740485000  |
| 7  | 6.605134000  | 5.815255000  | 2.415922000  |
| 6  | 6.173235000  | 6.916991000  | 3.280206000  |
| 6  | 5.976054000  | 6.513345000  | 4.762874000  |
| 6  | 4.752009000  | 5.663789000  | 5.045556000  |
| 6  | 3.528508000  | 6.271663000  | 5.384586000  |
| 6  | 2.395532000  | 5.499583000  | 5.671637000  |
| 6  | 2.467883000  | 4.099894000  | 5.617595000  |
| 6  | 3.677414000  | 3.483343000  | 5.272538000  |
| 6  | 4.808143000  | 4.260260000  | 4.993950000  |
| 1  | 7.512449000  | 5.406602000  | 2.593154000  |
| 1  | 5.243093000  | 7.300497000  | 2.854833000  |
| 1  | 6.879639000  | 5.994366000  | 5.110944000  |
| 1  | 5.912989000  | 7.442842000  | 5.343310000  |



|   |              |              |              |
|---|--------------|--------------|--------------|
| 1 | 3.469631000  | 7.355126000  | 5.446623000  |
| 1 | 1.468463000  | 5.986580000  | 5.958581000  |
| 1 | 1.599793000  | 3.497734000  | 5.869216000  |
| 1 | 3.743980000  | 2.401010000  | 5.232905000  |
| 1 | 5.746556000  | 3.772061000  | 4.749071000  |
| 6 | 2.909362000  | 0.685116000  | -3.989318000 |
| 6 | 1.832527000  | 1.791137000  | -4.009710000 |
| 6 | 0.570816000  | 1.436378000  | -4.814677000 |
| 6 | 2.488966000  | -0.567282000 | -3.199430000 |
| 1 | 3.170680000  | 0.405778000  | -5.022248000 |
| 1 | 1.539657000  | 2.011251000  | -2.974747000 |
| 1 | 2.272210000  | 2.709144000  | -4.427287000 |
| 1 | 0.819418000  | 1.226897000  | -5.865194000 |
| 1 | 0.071651000  | 0.550730000  | -4.403480000 |
| 1 | -0.146857000 | 2.264117000  | -4.786499000 |
| 1 | 3.307817000  | -1.296037000 | -3.143174000 |
| 1 | 1.630555000  | -1.068035000 | -3.662474000 |
| 1 | 2.200177000  | -0.288686000 | -2.178658000 |
| 6 | -1.614963000 | 6.126084000  | -2.347649000 |
| 6 | -0.457812000 | 5.976563000  | -1.326727000 |
| 6 | 0.814351000  | 5.334184000  | -1.907606000 |
| 6 | 1.908660000  | 5.130226000  | -0.842585000 |
| 7 | 1.477551000  | 4.148174000  | 0.163989000  |
| 6 | 1.487961000  | 4.328174000  | 1.490427000  |
| 7 | 2.220893000  | 5.319857000  | 2.060517000  |
| 7 | 0.747056000  | 3.512653000  | 2.264382000  |
| 6 | -2.091166000 | 4.795088000  | -2.916211000 |
| 8 | -1.640107000 | 4.379311000  | -4.022678000 |
| 1 | -1.272778000 | 6.717064000  | -3.202885000 |
| 1 | -0.794024000 | 5.379753000  | -0.469452000 |
| 1 | -0.213969000 | 6.975699000  | -0.936190000 |
| 1 | 0.573612000  | 4.370004000  | -2.370682000 |
| 1 | 1.221398000  | 5.968097000  | -2.707238000 |
| 1 | 2.836413000  | 4.788072000  | -1.315688000 |
| 1 | 2.132157000  | 6.078823000  | -0.344725000 |
| 1 | 1.132056000  | 3.213897000  | -0.180481000 |
| 1 | 3.062846000  | 5.670591000  | 1.605634000  |
| 1 | 2.111759000  | 5.512944000  | 3.044607000  |
| 1 | 0.066245000  | 2.835982000  | 1.829336000  |
| 1 | 0.933697000  | 3.466916000  | 3.254009000  |
| 7 | -2.976145000 | 4.061231000  | -2.190720000 |
| 6 | -3.416005000 | 2.721358000  | -2.662494000 |
| 6 | -4.421993000 | 2.253284000  | -1.591418000 |
| 6 | -4.030557000 | 3.052336000  | -0.326536000 |
| 6 | -3.582153000 | 4.415696000  | -0.884831000 |
| 1 | -2.542281000 | 2.064477000  | -2.738860000 |
| 1 | -5.443610000 | 2.507382000  | -1.900520000 |
| 1 | -4.381805000 | 1.171821000  | -1.433486000 |
| 1 | -4.857050000 | 3.150075000  | 0.384340000  |
| 1 | -3.190372000 | 2.573741000  | 0.190157000  |

|   |              |              |               |
|---|--------------|--------------|---------------|
| 1 | -2.860833000 | 4.913628000  | -0.233843000  |
| 1 | -4.439010000 | 5.090593000  | -1.031401000  |
| 6 | -2.427414000 | 0.261782000  | -9.328019000  |
| 6 | -3.102439000 | 1.381814000  | -8.564605000  |
| 6 | -4.404074000 | 1.795879000  | -8.904206000  |
| 6 | -5.028193000 | 2.837791000  | -8.210426000  |
| 6 | -4.361241000 | 3.482920000  | -7.159264000  |
| 6 | -3.067622000 | 3.081425000  | -6.803907000  |
| 6 | -2.448563000 | 2.038111000  | -7.507562000  |
| 1 | -2.303803000 | 0.518278000  | -10.388136000 |
| 1 | -1.433963000 | 0.045654000  | -8.921876000  |
| 1 | -4.927262000 | 1.299947000  | -9.718016000  |
| 1 | -6.031179000 | 3.147007000  | -8.490762000  |
| 1 | -4.844341000 | 4.293786000  | -6.622427000  |
| 1 | -2.545943000 | 3.567879000  | -5.984104000  |
| 1 | -1.440432000 | 1.737850000  | -7.234240000  |
| 6 | -5.714452000 | -4.360509000 | 0.681719000   |
| 6 | -4.458523000 | -4.720260000 | 0.212235000   |
| 6 | -3.615695000 | -5.743201000 | 0.795218000   |
| 6 | -2.490206000 | -5.820842000 | 0.025892000   |
| 6 | -2.628585000 | -4.841622000 | -1.031134000  |
| 7 | -3.841411000 | -4.184037000 | -0.902812000  |
| 6 | -1.674140000 | -4.588248000 | -2.003993000  |
| 6 | -1.777398000 | -3.626267000 | -2.997250000  |
| 6 | -0.750036000 | -3.340881000 | -3.976141000  |
| 6 | -1.204492000 | -2.306963000 | -4.746067000  |
| 6 | -2.518657000 | -1.955112000 | -4.250813000  |
| 7 | -2.851882000 | -2.770567000 | -3.186884000  |
| 6 | -3.330065000 | -0.964299000 | -4.790178000  |
| 6 | -4.616061000 | -0.675277000 | -4.366760000  |
| 6 | -5.486932000 | 0.294206000  | -5.000999000  |
| 6 | -6.681422000 | 0.247770000  | -4.341825000  |
| 6 | -6.553095000 | -0.739307000 | -3.289831000  |
| 7 | -5.283348000 | -1.292629000 | -3.316405000  |
| 6 | -7.548473000 | -1.057843000 | -2.380746000  |
| 6 | -7.409827000 | -1.961144000 | -1.338449000  |
| 6 | -8.423343000 | -2.229463000 | -0.341708000  |
| 6 | -7.895966000 | -3.134521000 | 0.534692000   |
| 6 | -6.557975000 | -3.441942000 | 0.078182000   |
| 7 | -6.276771000 | -2.712971000 | -1.071484000  |
| 1 | -6.077552000 | -4.861292000 | 1.572961000   |
| 1 | -0.765567000 | -5.179822000 | -1.975959000  |
| 1 | -2.940704000 | -0.391243000 | -5.624677000  |
| 1 | -8.498036000 | -0.541953000 | -2.474719000  |
| 8 | -0.891463000 | 1.738260000  | 1.049402000   |
| 6 | -0.380075000 | 1.228907000  | -0.017707000  |
| 8 | 0.664412000  | 1.688146000  | -0.619218000  |
| 6 | -1.092854000 | 0.030255000  | -0.666579000  |
| 6 | -1.802804000 | -0.863968000 | 0.334762000   |
| 1 | -1.838606000 | 0.447893000  | -1.355925000  |

|   |              |              |              |
|---|--------------|--------------|--------------|
| 1 | -0.371815000 | -0.504740000 | -1.287879000 |
| 1 | -2.407988000 | -0.270883000 | 1.026381000  |
| 8 | -3.859259000 | -1.468610000 | -1.026384000 |
| 1 | -3.014612000 | -0.664431000 | -9.287359000 |
| 1 | 3.826816000  | 1.094262000  | -3.539934000 |
| 1 | -3.853885000 | 2.794236000  | -3.661972000 |
| 1 | -2.445136000 | 6.667936000  | -1.878104000 |
| 1 | 7.610790000  | 4.488640000  | 0.382287000  |
| 1 | 6.921613000  | 7.718717000  | 3.229807000  |
| 1 | -8.358389000 | -3.568509000 | 1.409441000  |
| 1 | -3.866887000 | -6.315922000 | 1.676123000  |
| 1 | -7.576382000 | 0.820879000  | -4.536273000 |
| 1 | -9.401705000 | -1.771521000 | -0.325489000 |
| 1 | -1.631785000 | -6.462958000 | 0.155884000  |
| 1 | 0.189349000  | -3.869035000 | -4.050582000 |
| 1 | -5.206388000 | 0.909908000  | -5.843064000 |
| 1 | -0.712465000 | -1.820468000 | -5.575171000 |
| 6 | -1.071433000 | -1.941430000 | 1.026819000  |
| 6 | -1.532635000 | -2.389253000 | 2.290025000  |
| 6 | 0.076623000  | -2.569750000 | 0.487447000  |
| 6 | -0.874657000 | -3.402250000 | 2.985055000  |
| 1 | -2.412809000 | -1.919142000 | 2.718969000  |
| 6 | 0.737985000  | -3.581048000 | 1.188089000  |
| 1 | 0.457270000  | -2.257852000 | -0.478397000 |
| 6 | 0.268721000  | -4.003732000 | 2.438633000  |
| 1 | -1.245773000 | -3.721254000 | 3.954492000  |
| 1 | 1.624552000  | -4.039056000 | 0.759048000  |
| 1 | 0.786474000  | -4.788997000 | 2.981049000  |
| 1 | -2.790965000 | -1.375774000 | -0.362479000 |

<sup>4</sup>IM1<sub>beta,S1</sub>

|    |              |              |              |
|----|--------------|--------------|--------------|
| 26 | -4.794494000 | -2.556596000 | -2.116289000 |
| 16 | -5.715030000 | -4.203930000 | -3.529438000 |
| 1  | -6.913249000 | -4.376199000 | -2.863833000 |
| 6  | 6.470433000  | 4.359662000  | 0.657818000  |
| 6  | 6.219684000  | 2.967914000  | 1.302142000  |
| 6  | 4.757728000  | 2.462266000  | 1.242239000  |
| 6  | 4.305720000  | 2.156246000  | -0.199265000 |
| 6  | 4.593424000  | 1.212924000  | 2.130829000  |
| 6  | 5.821685000  | 5.503994000  | 1.416823000  |
| 8  | 4.711043000  | 5.993244000  | 1.077479000  |
| 1  | 6.073372000  | 4.380818000  | -0.359622000 |
| 1  | 6.866623000  | 2.238999000  | 0.793330000  |
| 1  | 6.550812000  | 2.997623000  | 2.351139000  |
| 1  | 4.106594000  | 3.251031000  | 1.646050000  |
| 1  | 3.257339000  | 1.840175000  | -0.222770000 |
| 1  | 4.395929000  | 3.031367000  | -0.852680000 |
| 1  | 4.915545000  | 1.349990000  | -0.629882000 |
| 1  | 3.556783000  | 0.859424000  | 2.114311000  |
| 1  | 4.867025000  | 1.421842000  | 3.173499000  |

|   |              |              |              |
|---|--------------|--------------|--------------|
| 1 | 5.231152000  | 0.393009000  | 1.774222000  |
| 7 | 6.513286000  | 5.968421000  | 2.501211000  |
| 6 | 6.078714000  | 7.095737000  | 3.330136000  |
| 6 | 5.870284000  | 6.734563000  | 4.822183000  |
| 6 | 4.642745000  | 5.895293000  | 5.120013000  |
| 6 | 3.420091000  | 6.514585000  | 5.441208000  |
| 6 | 2.283263000  | 5.752775000  | 5.740457000  |
| 6 | 2.350993000  | 4.351992000  | 5.717306000  |
| 6 | 3.559953000  | 3.723987000  | 5.391089000  |
| 6 | 4.694400000  | 4.490746000  | 5.099882000  |
| 1 | 7.413706000  | 5.556273000  | 2.703422000  |
| 1 | 5.152916000  | 7.470113000  | 2.887517000  |
| 1 | 6.770510000  | 6.224036000  | 5.190942000  |
| 1 | 5.805060000  | 7.680052000  | 5.375860000  |
| 1 | 3.364701000  | 7.599335000  | 5.479356000  |
| 1 | 1.356551000  | 6.248998000  | 6.012225000  |
| 1 | 1.479716000  | 3.758373000  | 5.977894000  |
| 1 | 3.622715000  | 2.640764000  | 5.375830000  |
| 1 | 5.631772000  | 3.994131000  | 4.868374000  |
| 6 | 2.987819000  | 0.327798000  | -3.984530000 |
| 6 | 1.947866000  | 1.457224000  | -3.822145000 |
| 6 | 0.701549000  | 1.301804000  | -4.710842000 |
| 6 | 2.517207000  | -1.036092000 | -3.449552000 |
| 1 | 3.257715000  | 0.231574000  | -5.047968000 |
| 1 | 1.633592000  | 1.519010000  | -2.771058000 |
| 1 | 2.432277000  | 2.415635000  | -4.062515000 |
| 1 | 0.981144000  | 1.257550000  | -5.773666000 |
| 1 | 0.147138000  | 0.385484000  | -4.471492000 |
| 1 | 0.018980000  | 2.147253000  | -4.570169000 |
| 1 | 3.290082000  | -1.804318000 | -3.579792000 |
| 1 | 1.612453000  | -1.381659000 | -3.962816000 |
| 1 | 2.286176000  | -0.968214000 | -2.378582000 |
| 6 | -1.616213000 | 6.071156000  | -2.504626000 |
| 6 | -0.487037000 | 6.097645000  | -1.443002000 |
| 6 | 0.832976000  | 5.455600000  | -1.906689000 |
| 6 | 1.851367000  | 5.327262000  | -0.759385000 |
| 7 | 1.369718000  | 4.367024000  | 0.246042000  |
| 6 | 1.394941000  | 4.550571000  | 1.570765000  |
| 7 | 2.136573000  | 5.544697000  | 2.127644000  |
| 7 | 0.662585000  | 3.742479000  | 2.361528000  |
| 6 | -1.965155000 | 4.659261000  | -2.958564000 |
| 8 | -1.456929000 | 4.193026000  | -4.020325000 |
| 1 | -1.292773000 | 6.608852000  | -3.401218000 |
| 1 | -0.825086000 | 5.583195000  | -0.535020000 |
| 1 | -0.303448000 | 7.144242000  | -1.158873000 |
| 1 | 0.642097000  | 4.464052000  | -2.333750000 |
| 1 | 1.282261000  | 6.056703000  | -2.708749000 |
| 1 | 2.824154000  | 5.003834000  | -1.147842000 |
| 1 | 2.003914000  | 6.299359000  | -0.278527000 |
| 1 | 1.005205000  | 3.438002000  | -0.098116000 |

|   |              |              |              |
|---|--------------|--------------|--------------|
| 1 | 2.979286000  | 5.882257000  | 1.664831000  |
| 1 | 2.042826000  | 5.737784000  | 3.113400000  |
| 1 | 0.012795000  | 3.022647000  | 1.950242000  |
| 1 | 0.861068000  | 3.713146000  | 3.349638000  |
| 7 | -2.788785000 | 3.914260000  | -2.177550000 |
| 6 | -3.093956000 | 2.499707000  | -2.523195000 |
| 6 | -4.203040000 | 2.107399000  | -1.531679000 |
| 6 | -3.931749000 | 3.007761000  | -0.305417000 |
| 6 | -3.469348000 | 4.339585000  | -0.929283000 |
| 1 | -2.186884000 | 1.896538000  | -2.395857000 |
| 1 | -5.186359000 | 2.339022000  | -1.961460000 |
| 1 | -4.184384000 | 1.040188000  | -1.293513000 |
| 1 | -4.812864000 | 3.137797000  | 0.330955000  |
| 1 | -3.126175000 | 2.586685000  | 0.307867000  |
| 1 | -2.791754000 | 4.890217000  | -0.272601000 |
| 1 | -4.324969000 | 4.990098000  | -1.164761000 |
| 6 | -2.201241000 | 0.112140000  | -9.343570000 |
| 6 | -2.873216000 | 1.244449000  | -8.595387000 |
| 6 | -4.151229000 | 1.694074000  | -8.976875000 |
| 6 | -4.770716000 | 2.749267000  | -8.299304000 |
| 6 | -4.122862000 | 3.372196000  | -7.222701000 |
| 6 | -2.853117000 | 2.935038000  | -6.825572000 |
| 6 | -2.238527000 | 1.878418000  | -7.513251000 |
| 1 | -1.232968000 | -0.138735000 | -8.898423000 |
| 1 | -2.817935000 | -0.795596000 | -9.340157000 |
| 1 | -4.659318000 | 1.216132000  | -9.810802000 |
| 1 | -5.754411000 | 3.087314000  | -8.612953000 |
| 1 | -4.601650000 | 4.194232000  | -6.699130000 |
| 1 | -2.344908000 | 3.405058000  | -5.987841000 |
| 1 | -1.248721000 | 1.550296000  | -7.207046000 |
| 6 | -5.925743000 | -4.234862000 | 0.675204000  |
| 6 | -4.674869000 | -4.578233000 | 0.188331000  |
| 6 | -3.832576000 | -5.615255000 | 0.739326000  |
| 6 | -2.720776000 | -5.696383000 | -0.050508000 |
| 6 | -2.865632000 | -4.709427000 | -1.095435000 |
| 7 | -4.056232000 | -4.016994000 | -0.920256000 |
| 6 | -1.958031000 | -4.508913000 | -2.121412000 |
| 6 | -2.105325000 | -3.579120000 | -3.138019000 |
| 6 | -1.126755000 | -3.335934000 | -4.173326000 |
| 6 | -1.599283000 | -2.310404000 | -4.943802000 |
| 6 | -2.876275000 | -1.915802000 | -4.393972000 |
| 7 | -3.175287000 | -2.710376000 | -3.298420000 |
| 6 | -3.661911000 | -0.888424000 | -4.892446000 |
| 6 | -4.890628000 | -0.518721000 | -4.374318000 |
| 6 | -5.736265000 | 0.511894000  | -4.937978000 |
| 6 | -6.880555000 | 0.541412000  | -4.192815000 |
| 6 | -6.747585000 | -0.463991000 | -3.160629000 |
| 7 | -5.518912000 | -1.093342000 | -3.279331000 |
| 6 | -7.714580000 | -0.748909000 | -2.211965000 |
| 6 | -7.588376000 | -1.709518000 | -1.221680000 |

|   |              |              |               |
|---|--------------|--------------|---------------|
| 6 | -8.571740000 | -1.960508000 | -0.193302000  |
| 6 | -8.064830000 | -2.932326000 | 0.623111000   |
| 6 | -6.766053000 | -3.293566000 | 0.103284000   |
| 7 | -6.497915000 | -2.547317000 | -1.037582000  |
| 1 | -6.278853000 | -4.750657000 | 1.561208000   |
| 1 | -1.059195000 | -5.114164000 | -2.120188000  |
| 1 | -3.293924000 | -0.339459000 | -5.751877000  |
| 1 | -8.631143000 | -0.170087000 | -2.237334000  |
| 8 | -0.825434000 | 1.767320000  | 1.273604000   |
| 6 | -0.275904000 | 1.278682000  | 0.216521000   |
| 8 | 0.581871000  | 1.899123000  | -0.519668000  |
| 6 | -0.682876000 | -0.138333000 | -0.228466000  |
| 6 | -0.922085000 | -1.060681000 | 0.924329000   |
| 1 | -1.610474000 | -0.026692000 | -0.816790000  |
| 1 | 0.080189000  | -0.500154000 | -0.920126000  |
| 1 | -1.562259000 | -0.663340000 | 1.708406000   |
| 8 | -4.003319000 | -1.309698000 | -1.049574000  |
| 1 | -2.023942000 | 0.376220000  | -10.394258000 |
| 1 | 3.910514000  | 0.613255000  | -3.457490000  |
| 1 | -3.397151000 | 2.426169000  | -3.570275000  |
| 1 | -2.499987000 | 6.584666000  | -2.105920000  |
| 1 | 7.552936000  | 4.533664000  | 0.592215000   |
| 1 | 6.829626000  | 7.893961000  | 3.262631000   |
| 1 | -8.512922000 | -3.369402000 | 1.503597000   |
| 1 | -4.076860000 | -6.199290000 | 1.614582000   |
| 1 | -7.746191000 | 1.175465000  | -4.318452000  |
| 1 | -9.516360000 | -1.442584000 | -0.112917000  |
| 1 | -1.867004000 | -6.348195000 | 0.057071000   |
| 1 | -0.199818000 | -3.880576000 | -4.277050000  |
| 1 | -5.472108000 | 1.115496000  | -5.794115000  |
| 1 | -1.137710000 | -1.848029000 | -5.803561000  |
| 6 | -0.320645000 | -2.328464000 | 1.138397000   |
| 6 | -0.614016000 | -3.056771000 | 2.336784000   |
| 6 | 0.592859000  | -2.938994000 | 0.221249000   |
| 6 | -0.036379000 | -4.293108000 | 2.596645000   |
| 1 | -1.303751000 | -2.617298000 | 3.052178000   |
| 6 | 1.167991000  | -4.176433000 | 0.494680000   |
| 1 | 0.843190000  | -2.428791000 | -0.701935000  |
| 6 | 0.862620000  | -4.867347000 | 1.679905000   |
| 1 | -0.278796000 | -4.817601000 | 3.516536000   |
| 1 | 1.865833000  | -4.609686000 | -0.216684000  |
| 1 | 1.319377000  | -5.829840000 | 1.888029000   |
| 1 | -3.405729000 | -1.685154000 | -0.365745000  |

<sup>4</sup>TS2<sub>reb,beta,S1</sub>

|    |              |              |              |
|----|--------------|--------------|--------------|
| 26 | -4.375033000 | -2.965708000 | -2.345078000 |
| 16 | -5.617260000 | -4.441174000 | -3.765963000 |
| 1  | -6.366794000 | -3.498360000 | -4.443569000 |
| 6  | 6.577100000  | 4.163963000  | 0.558883000  |
| 6  | 6.290403000  | 2.795201000  | 1.236729000  |

|   |              |              |              |
|---|--------------|--------------|--------------|
| 6 | 4.811078000  | 2.339553000  | 1.207356000  |
| 6 | 4.334225000  | 2.002518000  | -0.219196000 |
| 6 | 4.612323000  | 1.126706000  | 2.138412000  |
| 6 | 5.988463000  | 5.345216000  | 1.310252000  |
| 8 | 4.886216000  | 5.865816000  | 0.990234000  |
| 1 | 6.157050000  | 4.179843000  | -0.449410000 |
| 1 | 6.904651000  | 2.034004000  | 0.734849000  |
| 1 | 6.638166000  | 2.836156000  | 2.279995000  |
| 1 | 4.192226000  | 3.163710000  | 1.590439000  |
| 1 | 3.274699000  | 1.725044000  | -0.223788000 |
| 1 | 4.450289000  | 2.851356000  | -0.902572000 |
| 1 | 4.910430000  | 1.160931000  | -0.627918000 |
| 1 | 3.563803000  | 0.809318000  | 2.141259000  |
| 1 | 4.901460000  | 1.360417000  | 3.171536000  |
| 1 | 5.219270000  | 0.274376000  | 1.804710000  |
| 7 | 6.724260000  | 5.806929000  | 2.365886000  |
| 6 | 6.352295000  | 6.966466000  | 3.180813000  |
| 6 | 6.145656000  | 6.640262000  | 4.681328000  |
| 6 | 4.877120000  | 5.876798000  | 5.010477000  |
| 6 | 3.698900000  | 6.570424000  | 5.345701000  |
| 6 | 2.526045000  | 5.880534000  | 5.678085000  |
| 6 | 2.512108000  | 4.477987000  | 5.675587000  |
| 6 | 3.675756000  | 3.776248000  | 5.334773000  |
| 6 | 4.846355000  | 4.471451000  | 5.008762000  |
| 1 | 7.615354000  | 5.368216000  | 2.553018000  |
| 1 | 5.439203000  | 7.376125000  | 2.743154000  |
| 1 | 7.021043000  | 6.085418000  | 5.045640000  |
| 1 | 6.141646000  | 7.596084000  | 5.220749000  |
| 1 | 3.707134000  | 7.656932000  | 5.369614000  |
| 1 | 1.635618000  | 6.433828000  | 5.960760000  |
| 1 | 1.613769000  | 3.939974000  | 5.963693000  |
| 1 | 3.675802000  | 2.691058000  | 5.336183000  |
| 1 | 5.748033000  | 3.917878000  | 4.764861000  |
| 6 | 2.874584000  | 0.282830000  | -3.973948000 |
| 6 | 1.890785000  | 1.465073000  | -3.839907000 |
| 6 | 0.661416000  | 1.372512000  | -4.760812000 |
| 6 | 2.314188000  | -1.053798000 | -3.457443000 |
| 1 | 3.173280000  | 0.174193000  | -5.028495000 |
| 1 | 1.555798000  | 1.539769000  | -2.795978000 |
| 1 | 2.429597000  | 2.397802000  | -4.065808000 |
| 1 | 0.965567000  | 1.321093000  | -5.816426000 |
| 1 | 0.061010000  | 0.480659000  | -4.542718000 |
| 1 | 0.014962000  | 2.248006000  | -4.633036000 |
| 1 | 3.057397000  | -1.856995000 | -3.541539000 |
| 1 | 1.423933000  | -1.363985000 | -4.016020000 |
| 1 | 2.027974000  | -0.966964000 | -2.401446000 |
| 6 | -1.471424000 | 6.197112000  | -2.474619000 |
| 6 | -0.332203000 | 6.139811000  | -1.424518000 |
| 6 | 0.953053000  | 5.454722000  | -1.923542000 |
| 6 | 2.001827000  | 5.294051000  | -0.807469000 |

|   |              |              |              |
|---|--------------|--------------|--------------|
| 7 | 1.516052000  | 4.361645000  | 0.221981000  |
| 6 | 1.537783000  | 4.576810000  | 1.542524000  |
| 7 | 2.313242000  | 5.553206000  | 2.081580000  |
| 7 | 0.766579000  | 3.815534000  | 2.342805000  |
| 6 | -1.894618000 | 4.817907000  | -2.962772000 |
| 8 | -1.412953000 | 4.350036000  | -4.035089000 |
| 1 | -1.128531000 | 6.741711000  | -3.359667000 |
| 1 | -0.684016000 | 5.614852000  | -0.527485000 |
| 1 | -0.098738000 | 7.168555000  | -1.112991000 |
| 1 | 0.718587000  | 4.469436000  | -2.343682000 |
| 1 | 1.397852000  | 6.040499000  | -2.739360000 |
| 1 | 2.946962000  | 4.927227000  | -1.223817000 |
| 1 | 2.210320000  | 6.262027000  | -0.340555000 |
| 1 | 1.133369000  | 3.434777000  | -0.099265000 |
| 1 | 3.171081000  | 5.845890000  | 1.615094000  |
| 1 | 2.218405000  | 5.777375000  | 3.060649000  |
| 1 | 0.070800000  | 3.141084000  | 1.934710000  |
| 1 | 0.954835000  | 3.793129000  | 3.332960000  |
| 7 | -2.755519000 | 4.094826000  | -2.198983000 |
| 6 | -3.117451000 | 2.703884000  | -2.579190000 |
| 6 | -4.174980000 | 2.292761000  | -1.537252000 |
| 6 | -3.871416000 | 3.187764000  | -0.313398000 |
| 6 | -3.417601000 | 4.519517000  | -0.942273000 |
| 1 | -2.219803000 | 2.076250000  | -2.539158000 |
| 1 | -5.180656000 | 2.500342000  | -1.921592000 |
| 1 | -4.125198000 | 1.224283000  | -1.309602000 |
| 1 | -4.739584000 | 3.319068000  | 0.340338000  |
| 1 | -3.054248000 | 2.766447000  | 0.283181000  |
| 1 | -2.729763000 | 5.067530000  | -0.294690000 |
| 1 | -4.275662000 | 5.171667000  | -1.164300000 |
| 6 | -2.394461000 | 0.220184000  | -9.259216000 |
| 6 | -3.061060000 | 1.343780000  | -8.493689000 |
| 6 | -4.391507000 | 1.708984000  | -8.765854000 |
| 6 | -5.016746000 | 2.731472000  | -8.043191000 |
| 6 | -4.319067000 | 3.407171000  | -7.032854000 |
| 6 | -2.992088000 | 3.057327000  | -6.748098000 |
| 6 | -2.373625000 | 2.033980000  | -7.478862000 |
| 1 | -1.308250000 | 0.355556000  | -9.301307000 |
| 1 | -2.585681000 | -0.754240000 | -8.788104000 |
| 1 | -4.937237000 | 1.190891000  | -9.550185000 |
| 1 | -6.042559000 | 3.004443000  | -8.274081000 |
| 1 | -4.800543000 | 4.206925000  | -6.477885000 |
| 1 | -2.441447000 | 3.570277000  | -5.964283000 |
| 1 | -1.340840000 | 1.775372000  | -7.259985000 |
| 6 | -5.068180000 | -5.025954000 | 0.328172000  |
| 6 | -3.957736000 | -5.323296000 | -0.449695000 |
| 6 | -3.093268000 | -6.464388000 | -0.244640000 |
| 6 | -2.142226000 | -6.437571000 | -1.225309000 |
| 6 | -2.399383000 | -5.274036000 | -2.044528000 |
| 7 | -3.508514000 | -4.601111000 | -1.547564000 |



|   |              |              |               |
|---|--------------|--------------|---------------|
| 6 | -1.625497000 | -4.886130000 | -3.129628000  |
| 6 | -1.843942000 | -3.757729000 | -3.905668000  |
| 6 | -1.002061000 | -3.317558000 | -5.000320000  |
| 6 | -1.542748000 | -2.159602000 | -5.485155000  |
| 6 | -2.730088000 | -1.880142000 | -4.701448000  |
| 7 | -2.887847000 | -2.866750000 | -3.747011000  |
| 6 | -3.597962000 | -0.820839000 | -4.917779000  |
| 6 | -4.772760000 | -0.596030000 | -4.212582000  |
| 6 | -5.709976000 | 0.468858000  | -4.506090000  |
| 6 | -6.742957000 | 0.352331000  | -3.619020000  |
| 6 | -6.451565000 | -0.777845000 | -2.761606000  |
| 7 | -5.249707000 | -1.347510000 | -3.150330000  |
| 6 | -7.244758000 | -1.184035000 | -1.696516000  |
| 6 | -6.958768000 | -2.237178000 | -0.841636000  |
| 6 | -7.762209000 | -2.633114000 | 0.298322000   |
| 6 | -7.139975000 | -3.701941000 | 0.878881000   |
| 6 | -5.951761000 | -3.982248000 | 0.096839000   |
| 7 | -5.864525000 | -3.074360000 | -0.940141000  |
| 1 | -5.275311000 | -5.681105000 | 1.167046000   |
| 1 | -0.773966000 | -5.509113000 | -3.380190000  |
| 1 | -3.356022000 | -0.124917000 | -5.713443000  |
| 1 | -8.152899000 | -0.620798000 | -1.511141000  |
| 8 | -0.879455000 | 1.972933000  | 1.221648000   |
| 6 | -0.344305000 | 1.413122000  | 0.193066000   |
| 8 | 0.641672000  | 1.894292000  | -0.479396000  |
| 6 | -0.932097000 | 0.072256000  | -0.301146000  |
| 6 | -1.916776000 | -0.526820000 | 0.642009000   |
| 1 | -1.426003000 | 0.264831000  | -1.261547000  |
| 1 | -0.090764000 | -0.590631000 | -0.525581000  |
| 1 | -2.891967000 | -0.058284000 | 0.686395000   |
| 8 | -3.365375000 | -1.837407000 | -1.195233000  |
| 1 | -2.767395000 | 0.158845000  | -10.287574000 |
| 1 | 3.793427000  | 0.520336000  | -3.416838000  |
| 1 | -3.489107000 | 2.675432000  | -3.606697000  |
| 1 | -2.324519000 | 6.744092000  | -2.054539000  |
| 1 | 7.663267000  | 4.296640000  | 0.464972000   |
| 1 | 7.138986000  | 7.726872000  | 3.090623000   |
| 1 | -7.448800000 | -4.266117000 | 1.747046000   |
| 1 | -3.217140000 | -7.187453000 | 0.548325000   |
| 1 | -7.627050000 | 0.967793000  | -3.535301000  |
| 1 | -8.678079000 | -2.145941000 | 0.600257000   |
| 1 | -1.332100000 | -7.132510000 | -1.392042000  |
| 1 | -0.116390000 | -3.835884000 | -5.337846000  |
| 1 | -5.576916000 | 1.192711000  | -5.297175000  |
| 1 | -1.188988000 | -1.542903000 | -6.298150000  |
| 6 | -1.655437000 | -1.566666000 | 1.576751000   |
| 6 | -2.702541000 | -2.011422000 | 2.442245000   |
| 6 | -0.384603000 | -2.205596000 | 1.703133000   |
| 6 | -2.489842000 | -3.023487000 | 3.370217000   |
| 1 | -3.679432000 | -1.546203000 | 2.354212000   |

|   |              |              |              |
|---|--------------|--------------|--------------|
| 6 | -0.182847000 | -3.217178000 | 2.637006000  |
| 1 | 0.437155000  | -1.893122000 | 1.068705000  |
| 6 | -1.228706000 | -3.634954000 | 3.476440000  |
| 1 | -3.302728000 | -3.343568000 | 4.014782000  |
| 1 | 0.792832000  | -3.687177000 | 2.716456000  |
| 1 | -1.064078000 | -4.426072000 | 4.201020000  |
| 1 | -2.754330000 | -2.420654000 | -0.695724000 |

<sup>4</sup>Pr<sub>OH,beta,S1</sub>

|    |              |              |              |
|----|--------------|--------------|--------------|
| 26 | -4.613998000 | -2.900315000 | -2.544646000 |
| 16 | -5.472064000 | -4.583994000 | -4.126814000 |
| 1  | -6.601641000 | -4.935160000 | -3.410907000 |
| 6  | 6.548261000  | 3.776036000  | 0.827914000  |
| 6  | 6.220747000  | 2.468729000  | 1.600455000  |
| 6  | 4.733590000  | 2.038982000  | 1.566445000  |
| 6  | 4.290827000  | 1.597708000  | 0.157533000  |
| 6  | 4.485907000  | 0.908078000  | 2.584979000  |
| 6  | 5.962211000  | 5.022460000  | 1.469021000  |
| 8  | 4.916328000  | 5.576138000  | 1.035537000  |
| 1  | 6.155261000  | 3.722453000  | -0.189697000 |
| 1  | 6.831730000  | 1.660097000  | 1.174522000  |
| 1  | 6.543319000  | 2.582168000  | 2.646581000  |
| 1  | 4.121112000  | 2.902243000  | 1.865545000  |
| 1  | 3.224693000  | 1.348795000  | 0.138097000  |
| 1  | 4.451128000  | 2.384268000  | -0.588436000 |
| 1  | 4.855626000  | 0.710823000  | -0.161044000 |
| 1  | 3.432128000  | 0.607676000  | 2.582886000  |
| 1  | 4.749801000  | 1.219039000  | 3.604386000  |
| 1  | 5.087153000  | 0.022701000  | 2.338145000  |
| 7  | 6.638321000  | 5.507698000  | 2.553334000  |
| 6  | 6.267762000  | 6.728286000  | 3.273925000  |
| 6  | 5.935747000  | 6.497869000  | 4.769688000  |
| 6  | 4.602544000  | 5.827594000  | 5.041977000  |
| 6  | 3.439941000  | 6.604664000  | 5.204000000  |
| 6  | 2.205681000  | 6.005115000  | 5.483989000  |
| 6  | 2.113543000  | 4.610352000  | 5.601840000  |
| 6  | 3.261512000  | 3.825500000  | 5.433440000  |
| 6  | 4.493595000  | 4.431282000  | 5.158857000  |
| 1  | 7.486869000  | 5.036095000  | 2.834758000  |
| 1  | 5.410934000  | 7.154470000  | 2.747340000  |
| 1  | 6.747381000  | 5.915055000  | 5.226073000  |
| 1  | 5.951086000  | 7.480754000  | 5.258034000  |
| 1  | 3.507020000  | 7.687144000  | 5.133796000  |
| 1  | 1.325936000  | 6.623712000  | 5.633287000  |
| 1  | 1.164407000  | 4.144683000  | 5.850367000  |
| 1  | 3.200809000  | 2.746273000  | 5.529490000  |
| 1  | 5.381103000  | 3.815108000  | 5.050920000  |
| 6  | 3.016775000  | 0.506347000  | -3.754175000 |
| 6  | 2.040822000  | 1.697873000  | -3.862989000 |
| 6  | 0.920806000  | 1.509433000  | -4.900614000 |

|   |              |              |              |
|---|--------------|--------------|--------------|
| 6 | 2.379111000  | -0.747112000 | -3.129773000 |
| 1 | 3.419000000  | 0.266911000  | -4.751136000 |
| 1 | 1.591690000  | 1.865365000  | -2.874760000 |
| 1 | 2.610588000  | 2.604459000  | -4.117557000 |
| 1 | 1.337945000  | 1.382668000  | -5.909780000 |
| 1 | 0.312729000  | 0.625335000  | -4.675289000 |
| 1 | 0.250033000  | 2.375880000  | -4.908204000 |
| 1 | 3.114538000  | -1.552976000 | -3.010565000 |
| 1 | 1.560189000  | -1.132409000 | -3.748601000 |
| 1 | 1.964733000  | -0.506440000 | -2.143353000 |
| 6 | -1.319923000 | 6.080902000  | -2.610671000 |
| 6 | -0.192731000 | 5.915993000  | -1.558426000 |
| 6 | 1.034073000  | 5.137723000  | -2.066161000 |
| 6 | 2.090583000  | 4.913435000  | -0.966579000 |
| 7 | 1.555952000  | 4.057596000  | 0.103790000  |
| 6 | 1.490651000  | 4.377349000  | 1.402733000  |
| 7 | 2.260537000  | 5.366405000  | 1.925510000  |
| 7 | 0.634043000  | 3.704568000  | 2.193719000  |
| 6 | -1.874257000 | 4.752707000  | -3.110478000 |
| 8 | -1.441696000 | 4.247850000  | -4.186583000 |
| 1 | -0.926057000 | 6.596688000  | -3.491828000 |
| 1 | -0.589529000 | 5.407846000  | -0.670586000 |
| 1 | 0.120882000  | 6.918507000  | -1.231928000 |
| 1 | 0.723734000  | 4.167525000  | -2.470873000 |
| 1 | 1.506443000  | 5.681346000  | -2.896018000 |
| 1 | 2.984324000  | 4.445507000  | -1.394786000 |
| 1 | 2.401460000  | 5.870911000  | -0.538349000 |
| 1 | 1.171400000  | 3.115549000  | -0.167131000 |
| 1 | 3.161765000  | 5.598177000  | 1.508768000  |
| 1 | 2.093636000  | 5.675190000  | 2.871332000  |
| 1 | -0.079872000 | 3.059791000  | 1.765872000  |
| 1 | 0.749621000  | 3.739877000  | 3.194515000  |
| 7 | -2.809129000 | 4.115224000  | -2.356316000 |
| 6 | -3.317425000 | 2.775709000  | -2.753186000 |
| 6 | -4.407991000 | 2.462937000  | -1.709281000 |
| 6 | -4.006770000 | 3.306589000  | -0.477385000 |
| 6 | -3.422562000 | 4.591810000  | -1.092895000 |
| 1 | -2.491721000 | 2.055176000  | -2.728763000 |
| 1 | -5.390151000 | 2.775457000  | -2.085146000 |
| 1 | -4.464456000 | 1.394573000  | -1.482815000 |
| 1 | -4.852076000 | 3.515999000  | 0.185564000  |
| 1 | -3.230354000 | 2.796458000  | 0.103965000  |
| 1 | -2.680071000 | 5.057457000  | -0.441663000 |
| 1 | -4.209075000 | 5.331314000  | -1.306109000 |
| 6 | -2.406246000 | 0.238641000  | -9.569132000 |
| 6 | -3.077529000 | 1.281819000  | -8.700868000 |
| 6 | -4.437998000 | 1.593628000  | -8.875471000 |
| 6 | -5.065628000 | 2.544510000  | -8.062672000 |
| 6 | -4.341221000 | 3.199012000  | -7.056773000 |
| 6 | -2.985320000 | 2.900038000  | -6.866561000 |

|   |              |              |               |
|---|--------------|--------------|---------------|
| 6 | -2.364501000 | 1.949940000  | -7.688944000  |
| 1 | -1.323522000 | 0.396511000  | -9.617333000  |
| 1 | -2.573587000 | -0.775177000 | -9.179638000  |
| 1 | -5.004601000 | 1.092092000  | -9.655669000  |
| 1 | -6.113893000 | 2.781282000  | -8.222377000  |
| 1 | -4.824521000 | 3.945159000  | -6.432959000  |
| 1 | -2.417277000 | 3.396636000  | -6.084516000  |
| 1 | -1.308651000 | 1.733356000  | -7.546850000  |
| 6 | -4.960358000 | -4.890316000 | 0.249171000   |
| 6 | -3.741924000 | -4.925454000 | -0.405582000  |
| 6 | -2.659784000 | -5.822299000 | -0.080349000  |
| 6 | -1.654539000 | -5.585946000 | -0.975790000  |
| 6 | -2.106822000 | -4.539746000 | -1.859691000  |
| 7 | -3.385282000 | -4.121406000 | -1.488287000  |
| 6 | -1.381977000 | -4.041934000 | -2.927875000  |
| 6 | -1.826546000 | -3.050362000 | -3.787779000  |
| 6 | -1.051389000 | -2.509177000 | -4.877593000  |
| 6 | -1.808054000 | -1.533430000 | -5.465978000  |
| 6 | -3.056140000 | -1.471056000 | -4.746209000  |
| 7 | -3.061657000 | -2.411301000 | -3.718994000  |
| 6 | -4.079392000 | -0.584686000 | -5.037664000  |
| 6 | -5.272224000 | -0.510982000 | -4.339669000  |
| 6 | -6.340020000 | 0.412099000  | -4.649151000  |
| 6 | -7.351460000 | 0.165406000  | -3.764255000  |
| 6 | -6.912629000 | -0.909939000 | -2.904071000  |
| 7 | -5.629740000 | -1.310525000 | -3.259536000  |
| 6 | -7.672078000 | -1.461829000 | -1.886880000  |
| 6 | -7.251697000 | -2.490739000 | -1.060472000  |
| 6 | -8.025479000 | -3.027968000 | 0.032093000   |
| 6 | -7.261781000 | -3.989751000 | 0.633132000   |
| 6 | -6.012023000 | -4.052202000 | -0.084871000  |
| 7 | -6.020832000 | -3.137125000 | -1.133604000  |
| 1 | -5.102062000 | -5.565006000 | 1.086246000   |
| 1 | -0.394702000 | -4.454135000 | -3.103657000  |
| 1 | -3.932152000 | 0.101064000  | -5.864177000  |
| 1 | -8.661746000 | -1.052355000 | -1.716829000  |
| 8 | -1.073714000 | 2.008437000  | 0.974831000   |
| 6 | -0.505967000 | 1.282778000  | 0.070098000   |
| 8 | 0.637307000  | 1.555517000  | -0.464289000  |
| 6 | -1.255016000 | 0.041448000  | -0.413930000  |
| 6 | -2.032342000 | -0.673294000 | 0.700986000   |
| 1 | -1.997863000 | 0.371793000  | -1.150845000  |
| 1 | -0.560383000 | -0.627991000 | -0.929970000  |
| 1 | -2.507916000 | 0.102340000  | 1.308064000   |
| 8 | -3.173474000 | -1.418125000 | 0.149892000   |
| 1 | -2.796287000 | 0.257994000  | -10.592900000 |
| 1 | 3.877370000  | 0.807952000  | -3.138463000  |
| 1 | -3.695138000 | 2.801089000  | -3.778888000  |
| 1 | -2.119618000 | 6.702288000  | -2.188799000  |
| 1 | 7.638740000  | 3.885851000  | 0.754426000   |

|   |              |              |              |
|---|--------------|--------------|--------------|
| 1 | 7.096833000  | 7.444459000  | 3.202883000  |
| 1 | -7.505748000 | -4.600172000 | 1.490369000  |
| 1 | -2.680348000 | -6.537918000 | 0.728385000  |
| 1 | -8.312324000 | 0.653722000  | -3.690370000 |
| 1 | -9.017771000 | -2.695811000 | 0.300414000  |
| 1 | -0.690989000 | -6.069220000 | -1.043495000 |
| 1 | -0.056161000 | -2.835403000 | -5.141345000 |
| 1 | -6.298824000 | 1.139413000  | -5.446542000 |
| 1 | -1.556544000 | -0.897460000 | -6.301367000 |
| 6 | -1.190636000 | -1.569042000 | 1.604943000  |
| 6 | -1.838172000 | -2.517165000 | 2.419142000  |
| 6 | 0.208800000  | -1.464165000 | 1.679164000  |
| 6 | -1.107960000 | -3.336301000 | 3.284567000  |
| 1 | -2.917067000 | -2.607110000 | 2.354825000  |
| 6 | 0.940105000  | -2.285069000 | 2.547510000  |
| 1 | 0.735197000  | -0.744981000 | 1.061079000  |
| 6 | 0.286509000  | -3.222844000 | 3.353271000  |
| 1 | -1.625395000 | -4.062425000 | 3.905081000  |
| 1 | 2.021796000  | -2.192882000 | 2.587406000  |
| 1 | 0.855257000  | -3.859699000 | 4.024404000  |
| 1 | -2.873378000 | -2.229580000 | -0.313509000 |

<sup>4</sup>TS2<sub>DS,beta,S1</sub>

|    |              |              |              |
|----|--------------|--------------|--------------|
| 26 | -4.617016000 | -2.321233000 | -1.846408000 |
| 16 | -5.858188000 | -4.060652000 | -2.951693000 |
| 1  | -5.013413000 | -4.239537000 | -4.030211000 |
| 6  | 6.229098000  | 3.868406000  | 0.864330000  |
| 6  | 5.810498000  | 2.506627000  | 1.485387000  |
| 6  | 4.317281000  | 2.131410000  | 1.324472000  |
| 6  | 3.938386000  | 1.867721000  | -0.146016000 |
| 6  | 3.984952000  | 0.900876000  | 2.192173000  |
| 6  | 5.623557000  | 5.067680000  | 1.572118000  |
| 8  | 4.555801000  | 5.611596000  | 1.181070000  |
| 1  | 5.915448000  | 3.917195000  | -0.181085000 |
| 1  | 6.424073000  | 1.721836000  | 1.020021000  |
| 1  | 6.070544000  | 2.510359000  | 2.554772000  |
| 1  | 3.713090000  | 2.974095000  | 1.689544000  |
| 1  | 2.870604000  | 1.643168000  | -0.242280000 |
| 1  | 4.144971000  | 2.732726000  | -0.786271000 |
| 1  | 4.503500000  | 1.012689000  | -0.541857000 |
| 1  | 2.925608000  | 0.636326000  | 2.100941000  |
| 1  | 4.200518000  | 1.086891000  | 3.252518000  |
| 1  | 4.573684000  | 0.029021000  | 1.877042000  |
| 7  | 6.301623000  | 5.517310000  | 2.670721000  |
| 6  | 5.904647000  | 6.687048000  | 3.458600000  |
| 6  | 5.603287000  | 6.369221000  | 4.944657000  |
| 6  | 4.309043000  | 5.619560000  | 5.195442000  |
| 6  | 3.115532000  | 6.325998000  | 5.436303000  |
| 6  | 1.916126000  | 5.648721000  | 5.690854000  |
| 6  | 1.890808000  | 4.246254000  | 5.703205000  |

|   |              |              |              |
|---|--------------|--------------|--------------|
| 6 | 3.070669000  | 3.531696000  | 5.457583000  |
| 6 | 4.267527000  | 4.214473000  | 5.209805000  |
| 1 | 7.169199000  | 5.059714000  | 2.914592000  |
| 1 | 5.027125000  | 7.112709000  | 2.966669000  |
| 1 | 6.448573000  | 5.806721000  | 5.364183000  |
| 1 | 5.575833000  | 7.327177000  | 5.479690000  |
| 1 | 3.130507000  | 7.412625000  | 5.446365000  |
| 1 | 1.011754000  | 6.211764000  | 5.900453000  |
| 1 | 0.969019000  | 3.718650000  | 5.930051000  |
| 1 | 3.061815000  | 2.446555000  | 5.472007000  |
| 1 | 5.180432000  | 3.651758000  | 5.039229000  |
| 6 | 3.007382000  | 0.455753000  | -4.064836000 |
| 6 | 1.929203000  | 1.548776000  | -3.903079000 |
| 6 | 0.750040000  | 1.425002000  | -4.883601000 |
| 6 | 2.540160000  | -0.949823000 | -3.648473000 |
| 1 | 3.346157000  | 0.433765000  | -5.112342000 |
| 1 | 1.540330000  | 1.534304000  | -2.875339000 |
| 1 | 2.403500000  | 2.531327000  | -4.046442000 |
| 1 | 1.103446000  | 1.436996000  | -5.924894000 |
| 1 | 0.192421000  | 0.493177000  | -4.727343000 |
| 1 | 0.050276000  | 2.257257000  | -4.749977000 |
| 1 | 3.337238000  | -1.692042000 | -3.784266000 |
| 1 | 1.673611000  | -1.277366000 | -4.234040000 |
| 1 | 2.247559000  | -0.958962000 | -2.590235000 |
| 6 | -1.496771000 | 6.245484000  | -2.769402000 |
| 6 | -0.433513000 | 6.212438000  | -1.640859000 |
| 6 | 0.848632000  | 5.441232000  | -2.004076000 |
| 6 | 1.754975000  | 5.209826000  | -0.783072000 |
| 7 | 1.117856000  | 4.279798000  | 0.165442000  |
| 6 | 1.116197000  | 4.419042000  | 1.496408000  |
| 7 | 1.911148000  | 5.339668000  | 2.103641000  |
| 7 | 0.307814000  | 3.645194000  | 2.246835000  |
| 6 | -1.880501000 | 4.845898000  | -3.233238000 |
| 8 | -1.339730000 | 4.356097000  | -4.268315000 |
| 1 | -1.092617000 | 6.759463000  | -3.646606000 |
| 1 | -0.869505000 | 5.759544000  | -0.741668000 |
| 1 | -0.174952000 | 7.247589000  | -1.374266000 |
| 1 | 0.596587000  | 4.475173000  | -2.457007000 |
| 1 | 1.418755000  | 5.995209000  | -2.761809000 |
| 1 | 2.726692000  | 4.812099000  | -1.097839000 |
| 1 | 1.946025000  | 6.158936000  | -0.271253000 |
| 1 | 0.676147000  | 3.409537000  | -0.223852000 |
| 1 | 2.792710000  | 5.624798000  | 1.679276000  |
| 1 | 1.804558000  | 5.507432000  | 3.092994000  |
| 1 | -0.341102000 | 2.937913000  | 1.816164000  |
| 1 | 0.465969000  | 3.600328000  | 3.241750000  |
| 7 | -2.747915000 | 4.128689000  | -2.475410000 |
| 6 | -3.024873000 | 2.698383000  | -2.783326000 |
| 6 | -4.158782000 | 2.322229000  | -1.815176000 |
| 6 | -3.956942000 | 3.279123000  | -0.618947000 |

|   |              |              |              |
|---|--------------|--------------|--------------|
| 6 | -3.493036000 | 4.592209000  | -1.279617000 |
| 1 | -2.114435000 | 2.115730000  | -2.600680000 |
| 1 | -5.133360000 | 2.500833000  | -2.286521000 |
| 1 | -4.103379000 | 1.267497000  | -1.534395000 |
| 1 | -4.866549000 | 3.419766000  | -0.025952000 |
| 1 | -3.172815000 | 2.895208000  | 0.044565000  |
| 1 | -2.860303000 | 5.188964000  | -0.618578000 |
| 1 | -4.350965000 | 5.210767000  | -1.582894000 |
| 6 | -2.208466000 | 0.010586000  | -9.416936000 |
| 6 | -2.900748000 | 1.121038000  | -8.654844000 |
| 6 | -4.223970000 | 1.485580000  | -8.963582000 |
| 6 | -4.854265000 | 2.535898000  | -8.287027000 |
| 6 | -4.171208000 | 3.237216000  | -7.283843000 |
| 6 | -2.855766000 | 2.882909000  | -6.957580000 |
| 6 | -2.231772000 | 1.830920000  | -7.642113000 |
| 1 | -1.346975000 | -0.377395000 | -8.863082000 |
| 1 | -2.888022000 | -0.825952000 | -9.616295000 |
| 1 | -4.759987000 | 0.944559000  | -9.739304000 |
| 1 | -5.874276000 | 2.807286000  | -8.544405000 |
| 1 | -4.658668000 | 4.053851000  | -6.759943000 |
| 1 | -2.320423000 | 3.412961000  | -6.174337000 |
| 1 | -1.209979000 | 1.563120000  | -7.386677000 |
| 6 | -5.384937000 | -3.813896000 | 1.170000000  |
| 6 | -4.215435000 | -4.240737000 | 0.555458000  |
| 6 | -3.318954000 | -5.267909000 | 1.052738000  |
| 6 | -2.311572000 | -5.401725000 | 0.138357000  |
| 6 | -2.573070000 | -4.452762000 | -0.928621000 |
| 7 | -3.729124000 | -3.758897000 | -0.642705000 |
| 6 | -1.777667000 | -4.251878000 | -2.049404000 |
| 6 | -2.019782000 | -3.332177000 | -3.065204000 |
| 6 | -1.133432000 | -3.095088000 | -4.187166000 |
| 6 | -1.693049000 | -2.105988000 | -4.946876000 |
| 6 | -2.938072000 | -1.725408000 | -4.311470000 |
| 7 | -3.116227000 | -2.492260000 | -3.170519000 |
| 6 | -3.817717000 | -0.771807000 | -4.812756000 |
| 6 | -5.035790000 | -0.420627000 | -4.245161000 |
| 6 | -5.993597000 | 0.511604000  | -4.812097000 |
| 6 | -7.062837000 | 0.555067000  | -3.960470000 |
| 6 | -6.770711000 | -0.341899000 | -2.857245000 |
| 7 | -5.534529000 | -0.919133000 | -3.059269000 |
| 6 | -7.580627000 | -0.562875000 | -1.751134000 |
| 6 | -7.285014000 | -1.402802000 | -0.682679000 |
| 6 | -8.137712000 | -1.593076000 | 0.471142000  |
| 6 | -7.516412000 | -2.488711000 | 1.295872000  |
| 6 | -6.273575000 | -2.871765000 | 0.660712000  |
| 7 | -6.146923000 | -2.185192000 | -0.539133000 |
| 1 | -5.646196000 | -4.272545000 | 2.117700000  |
| 1 | -0.879926000 | -4.853908000 | -2.134781000 |
| 1 | -3.535508000 | -0.273577000 | -5.733984000 |
| 1 | -8.525330000 | -0.031343000 | -1.710849000 |

|   |              |              |               |
|---|--------------|--------------|---------------|
| 8 | -1.119609000 | 1.615539000  | 1.181569000   |
| 6 | -0.564700000 | 1.174757000  | 0.106035000   |
| 8 | 0.160875000  | 1.873759000  | -0.694656000  |
| 6 | -0.757550000 | -0.314631000 | -0.245219000  |
| 6 | -0.535563000 | -1.174652000 | 0.927178000   |
| 1 | -1.829785000 | -0.446382000 | -0.575963000  |
| 1 | -0.129825000 | -0.558748000 | -1.104200000  |
| 1 | -1.006418000 | -0.822716000 | 1.843779000   |
| 8 | -3.617618000 | -0.952802000 | -0.965363000  |
| 1 | -1.837696000 | 0.365236000  | -10.388536000 |
| 1 | 3.887491000  | 0.727660000  | -3.462643000  |
| 1 | -3.295604000 | 2.582809000  | -3.835229000  |
| 1 | -2.374931000 | 6.805998000  | -2.425520000  |
| 1 | 7.324343000  | 3.947037000  | 0.881909000   |
| 1 | 6.709681000  | 7.432141000  | 3.413587000   |
| 1 | -7.860725000 | -2.873977000 | 2.244644000   |
| 1 | -3.457708000 | -5.809601000 | 1.977313000   |
| 1 | -7.969051000 | 1.135715000  | -4.055799000  |
| 1 | -9.087652000 | -1.099218000 | 0.615328000   |
| 1 | -1.457744000 | -6.062342000 | 0.176310000   |
| 1 | -0.206827000 | -3.624535000 | -4.355900000  |
| 1 | -5.846912000 | 1.049723000  | -5.737477000  |
| 1 | -1.316362000 | -1.665447000 | -5.858196000  |
| 6 | 0.215992000  | -2.373602000 | 0.998963000   |
| 6 | 0.299106000  | -3.075004000 | 2.243491000   |
| 6 | 0.917357000  | -2.928186000 | -0.116657000  |
| 6 | 1.036639000  | -4.245467000 | 2.364332000   |
| 1 | -0.233126000 | -2.673339000 | 3.101116000   |
| 6 | 1.656712000  | -4.098885000 | 0.017668000   |
| 1 | 0.871828000  | -2.427749000 | -1.076619000  |
| 6 | 1.723042000  | -4.766736000 | 1.252790000   |
| 1 | 1.083190000  | -4.760140000 | 3.319133000   |
| 1 | 2.189576000  | -4.498449000 | -0.840003000  |
| 1 | 2.303641000  | -5.678812000 | 1.349044000   |
| 1 | -4.092107000 | -0.654098000 | -0.159149000  |

<sup>4</sup>Pr<sub>DS,beta,S1</sub>

|    |              |              |              |
|----|--------------|--------------|--------------|
| 26 | -5.080833000 | -3.330067000 | -2.858692000 |
| 16 | -6.178076000 | -4.502899000 | -4.763981000 |
| 1  | -6.612794000 | -3.387469000 | -5.455081000 |
| 6  | 6.768087000  | 4.967002000  | 0.401239000  |
| 6  | 6.601980000  | 3.641543000  | 1.195577000  |
| 6  | 5.153104000  | 3.105596000  | 1.293374000  |
| 6  | 4.618362000  | 2.618902000  | -0.067926000 |
| 6  | 5.076008000  | 1.969937000  | 2.333399000  |
| 6  | 6.168201000  | 6.172029000  | 1.104380000  |
| 8  | 5.004642000  | 6.587815000  | 0.857009000  |
| 1  | 6.281024000  | 4.884458000  | -0.573275000 |
| 1  | 7.229352000  | 2.877827000  | 0.714025000  |
| 1  | 7.008081000  | 3.782541000  | 2.208752000  |



|   |              |              |              |
|---|--------------|--------------|--------------|
| 1 | 4.508985000  | 3.925275000  | 1.641607000  |
| 1 | 3.582289000  | 2.274996000  | 0.020632000  |
| 1 | 4.634227000  | 3.411711000  | -0.824688000 |
| 1 | 5.226302000  | 1.783730000  | -0.442590000 |
| 1 | 4.049527000  | 1.597968000  | 2.421909000  |
| 1 | 5.403674000  | 2.309449000  | 3.324726000  |
| 1 | 5.714002000  | 1.125688000  | 2.039230000  |
| 7 | 6.967103000  | 6.776947000  | 2.035034000  |
| 6 | 6.592718000  | 7.982165000  | 2.779188000  |
| 6 | 6.546860000  | 7.783888000  | 4.315062000  |
| 6 | 5.373264000  | 6.972605000  | 4.829233000  |
| 6 | 4.180327000  | 7.614702000  | 5.211251000  |
| 6 | 3.097243000  | 6.882913000  | 5.714239000  |
| 6 | 3.189432000  | 5.488775000  | 5.838395000  |
| 6 | 4.367844000  | 4.837072000  | 5.452255000  |
| 6 | 5.449137000  | 5.574795000  | 4.955906000  |
| 1 | 7.901863000  | 6.415840000  | 2.166343000  |
| 1 | 5.617661000  | 8.295022000  | 2.398956000  |
| 1 | 7.489924000  | 7.323130000  | 4.639409000  |
| 1 | 6.521180000  | 8.783199000  | 4.768359000  |
| 1 | 4.108725000  | 8.696552000  | 5.136419000  |
| 1 | 2.195893000  | 7.399604000  | 6.029672000  |
| 1 | 2.363303000  | 4.922038000  | 6.257782000  |
| 1 | 4.450266000  | 3.759505000  | 5.550848000  |
| 1 | 6.365505000  | 5.062371000  | 4.679378000  |
| 6 | 2.969013000  | -0.282998000 | -3.250410000 |
| 6 | 2.080926000  | 0.979655000  | -3.224855000 |
| 6 | 0.830790000  | 0.888775000  | -4.117312000 |
| 6 | 2.310211000  | -1.528288000 | -2.630923000 |
| 1 | 3.256300000  | -0.503019000 | -4.290485000 |
| 1 | 1.778101000  | 1.197603000  | -2.190778000 |
| 1 | 2.685783000  | 1.838282000  | -3.552671000 |
| 1 | 1.112680000  | 0.726608000  | -5.168004000 |
| 1 | 0.179761000  | 0.057812000  | -3.817806000 |
| 1 | 0.239211000  | 1.808550000  | -4.055973000 |
| 1 | 2.989432000  | -2.389789000 | -2.651317000 |
| 1 | 1.396982000  | -1.812240000 | -3.167144000 |
| 1 | 2.041186000  | -1.340391000 | -1.582846000 |
| 6 | -1.638529000 | 5.739364000  | -2.188821000 |
| 6 | -0.489282000 | 5.988505000  | -1.178558000 |
| 6 | 0.890943000  | 5.511395000  | -1.666290000 |
| 6 | 1.977938000  | 5.666884000  | -0.587865000 |
| 7 | 1.685648000  | 4.787593000  | 0.554850000  |
| 6 | 1.826195000  | 5.122093000  | 1.841911000  |
| 7 | 2.554700000  | 6.210769000  | 2.204849000  |
| 7 | 1.224066000  | 4.372484000  | 2.785197000  |
| 6 | -1.797738000 | 4.266730000  | -2.541400000 |
| 8 | -1.230829000 | 3.797663000  | -3.571252000 |
| 1 | -1.420893000 | 6.257324000  | -3.128032000 |
| 1 | -0.719458000 | 5.488625000  | -0.229448000 |

|   |              |              |              |
|---|--------------|--------------|--------------|
| 1 | -0.447413000 | 7.066256000  | -0.962630000 |
| 1 | 0.837434000  | 4.461805000  | -1.978735000 |
| 1 | 1.194053000  | 6.083823000  | -2.553281000 |
| 1 | 2.965087000  | 5.432062000  | -1.003440000 |
| 1 | 2.016205000  | 6.703457000  | -0.233714000 |
| 1 | 1.359032000  | 3.805137000  | 0.348919000  |
| 1 | 3.333243000  | 6.522552000  | 1.625966000  |
| 1 | 2.544754000  | 6.514376000  | 3.166942000  |
| 1 | 0.566663000  | 3.595859000  | 2.514769000  |
| 1 | 1.518195000  | 4.460479000  | 3.745444000  |
| 7 | -2.517595000 | 3.475693000  | -1.704457000 |
| 6 | -2.642649000 | 2.015443000  | -1.953371000 |
| 6 | -3.743330000 | 1.573344000  | -0.974375000 |
| 6 | -3.600111000 | 2.563306000  | 0.203935000  |
| 6 | -3.247080000 | 3.898458000  | -0.483251000 |
| 1 | -1.681563000 | 1.530761000  | -1.743277000 |
| 1 | -4.728140000 | 1.681390000  | -1.446110000 |
| 1 | -3.635409000 | 0.526730000  | -0.678512000 |
| 1 | -4.509618000 | 2.643612000  | 0.807761000  |
| 1 | -2.777315000 | 2.265524000  | 0.863593000  |
| 1 | -2.625467000 | 4.533221000  | 0.153092000  |
| 1 | -4.152052000 | 4.460967000  | -0.755737000 |
| 6 | -1.910604000 | 0.038550000  | -9.049249000 |
| 6 | -2.569130000 | 1.181569000  | -8.306303000 |
| 6 | -3.832907000 | 1.659770000  | -8.693386000 |
| 6 | -4.453292000 | 2.698961000  | -7.990061000 |
| 6 | -3.817780000 | 3.277213000  | -6.883643000 |
| 6 | -2.556587000 | 2.814031000  | -6.482680000 |
| 6 | -1.941906000 | 1.776570000  | -7.195919000 |
| 1 | -0.820741000 | 0.150650000  | -9.070785000 |
| 1 | -2.130462000 | -0.926896000 | -8.572519000 |
| 1 | -4.331360000 | 1.215979000  | -9.551119000 |
| 1 | -5.427201000 | 3.058691000  | -8.309613000 |
| 1 | -4.294072000 | 4.089865000  | -6.342894000 |
| 1 | -2.055230000 | 3.251093000  | -5.623602000 |
| 1 | -0.957614000 | 1.431939000  | -6.888360000 |
| 6 | -6.316831000 | -5.687630000 | -0.666023000 |
| 6 | -5.096725000 | -5.949539000 | -1.274826000 |
| 6 | -4.335047000 | -7.163944000 | -1.097013000 |
| 6 | -3.197454000 | -7.041925000 | -1.848988000 |
| 6 | -3.248394000 | -5.750192000 | -2.493390000 |
| 7 | -4.418392000 | -5.093077000 | -2.133231000 |
| 6 | -2.255705000 | -5.240352000 | -3.319513000 |
| 6 | -2.284208000 | -3.990521000 | -3.919079000 |
| 6 | -1.244087000 | -3.463039000 | -4.776342000 |
| 6 | -1.651256000 | -2.224998000 | -5.188189000 |
| 6 | -2.947427000 | -1.982369000 | -4.591333000 |
| 7 | -3.312631000 | -3.065389000 | -3.804648000 |
| 6 | -3.714886000 | -0.849374000 | -4.813352000 |
| 6 | -4.976235000 | -0.630637000 | -4.277466000 |

|   |              |              |               |
|---|--------------|--------------|---------------|
| 6 | -5.759865000 | 0.564665000  | -4.497828000  |
| 6 | -6.915362000 | 0.424032000  | -3.779147000  |
| 6 | -6.851145000 | -0.856589000 | -3.110414000  |
| 7 | -5.664900000 | -1.497087000 | -3.439925000  |
| 6 | -7.822259000 | -1.343096000 | -2.246146000  |
| 6 | -7.748304000 | -2.546130000 | -1.561399000  |
| 6 | -8.776356000 | -3.061201000 | -0.683621000  |
| 6 | -8.351683000 | -4.281070000 | -0.236817000  |
| 6 | -7.058907000 | -4.529185000 | -0.836831000  |
| 7 | -6.694602000 | -3.448348000 | -1.630048000  |
| 1 | -6.728825000 | -6.456529000 | -0.021233000  |
| 1 | -1.393417000 | -5.869613000 | -3.512710000  |
| 1 | -3.302869000 | -0.078233000 | -5.455242000  |
| 1 | -8.706295000 | -0.733260000 | -2.093840000  |
| 8 | -0.296431000 | 2.274889000  | 2.020044000   |
| 6 | 0.188315000  | 1.667410000  | 0.987617000   |
| 8 | 0.987729000  | 2.211886000  | 0.125839000   |
| 6 | -0.183091000 | 0.244347000  | 0.746923000   |
| 6 | -0.960396000 | -0.447177000 | 1.602805000   |
| 1 | -3.134050000 | -2.506381000 | -0.786955000  |
| 1 | 0.225490000  | -0.189699000 | -0.160414000  |
| 1 | -1.316381000 | 0.093540000  | 2.478208000   |
| 8 | -4.062580000 | -2.251551000 | -0.960356000  |
| 1 | -2.264641000 | -0.023864000 | -10.083810000 |
| 1 | 3.903881000  | -0.071771000 | -2.710480000  |
| 1 | -2.888960000 | 1.833973000  | -3.001830000  |
| 1 | -2.571458000 | 6.151895000  | -1.785646000  |
| 1 | 7.836582000  | 5.144776000  | 0.220150000   |
| 1 | 7.314330000  | 8.776702000  | 2.548352000   |
| 1 | -8.860886000 | -4.965388000 | 0.426386000   |
| 1 | -4.644757000 | -7.997792000 | -0.483492000  |
| 1 | -7.740478000 | 1.116770000  | -3.696663000  |
| 1 | -9.701013000 | -2.550486000 | -0.456688000  |
| 1 | -2.395048000 | -7.755721000 | -1.968204000  |
| 1 | -0.332388000 | -3.985523000 | -5.027408000  |
| 1 | -5.448481000 | 1.388697000  | -5.123494000  |
| 1 | -1.138189000 | -1.529835000 | -5.836020000  |
| 6 | -1.391344000 | -1.845118000 | 1.483615000   |
| 6 | -2.297177000 | -2.364596000 | 2.432717000   |
| 6 | -0.947144000 | -2.706226000 | 0.452761000   |
| 6 | -2.752299000 | -3.685175000 | 2.355225000   |
| 1 | -2.645102000 | -1.718738000 | 3.233845000   |
| 6 | -1.399814000 | -4.026367000 | 0.376690000   |
| 1 | -0.237875000 | -2.343948000 | -0.283925000  |
| 6 | -2.308040000 | -4.522902000 | 1.325418000   |
| 1 | -3.450518000 | -4.059211000 | 3.097727000   |
| 1 | -1.051245000 | -4.669167000 | -0.424584000  |
| 1 | -2.663652000 | -5.544971000 | 1.252265000   |
| 1 | -4.610815000 | -2.476511000 | -0.185429000  |

<sup>4</sup>TS2<sub>DC,beta,S1</sub>

|    |              |              |              |
|----|--------------|--------------|--------------|
| 26 | -4.848911000 | -2.772488000 | -2.644821000 |
| 16 | -5.694583000 | -4.307145000 | -4.227731000 |
| 1  | -6.771271000 | -4.761788000 | -3.491393000 |
| 6  | 6.628548000  | 4.292175000  | 0.335843000  |
| 6  | 6.483746000  | 2.921623000  | 1.051353000  |
| 6  | 5.031199000  | 2.425267000  | 1.253625000  |
| 6  | 4.331178000  | 2.112490000  | -0.083371000 |
| 6  | 5.023279000  | 1.182692000  | 2.166840000  |
| 6  | 6.078664000  | 5.459673000  | 1.136962000  |
| 8  | 4.964285000  | 5.988796000  | 0.876980000  |
| 1  | 6.098572000  | 4.279491000  | -0.618791000 |
| 1  | 7.032342000  | 2.173788000  | 0.461232000  |
| 1  | 6.987592000  | 2.973669000  | 2.028581000  |
| 1  | 4.465380000  | 3.220486000  | 1.762367000  |
| 1  | 3.297769000  | 1.787126000  | 0.076081000  |
| 1  | 4.293441000  | 2.986011000  | -0.743240000 |
| 1  | 4.859960000  | 1.310049000  | -0.615572000 |
| 1  | 3.999667000  | 0.830063000  | 2.334411000  |
| 1  | 5.475555000  | 1.397006000  | 3.144027000  |
| 1  | 5.588147000  | 0.359517000  | 1.709546000  |
| 7  | 6.866274000  | 5.903028000  | 2.161969000  |
| 6  | 6.543883000  | 7.055515000  | 3.007911000  |
| 6  | 6.426841000  | 6.715816000  | 4.514970000  |
| 6  | 5.180893000  | 5.948602000  | 4.914514000  |
| 6  | 4.026133000  | 6.638637000  | 5.330146000  |
| 6  | 2.878020000  | 5.944925000  | 5.733866000  |
| 6  | 2.865191000  | 4.542171000  | 5.722704000  |
| 6  | 4.004107000  | 3.844210000  | 5.299763000  |
| 6  | 5.150428000  | 4.543316000  | 4.902794000  |
| 1  | 7.763506000  | 5.457971000  | 2.298892000  |
| 1  | 5.607507000  | 7.470369000  | 2.628337000  |
| 1  | 7.322479000  | 6.158371000  | 4.821439000  |
| 1  | 6.455284000  | 7.666821000  | 5.061989000  |
| 1  | 4.035880000  | 7.724914000  | 5.362953000  |
| 1  | 2.008096000  | 6.494924000  | 6.079692000  |
| 1  | 1.989566000  | 4.000996000  | 6.069243000  |
| 1  | 4.005423000  | 2.759090000  | 5.293907000  |
| 1  | 6.034485000  | 3.992121000  | 4.597300000  |
| 6  | 2.893721000  | 0.133127000  | -3.703911000 |
| 6  | 1.941318000  | 1.344830000  | -3.611818000 |
| 6  | 0.749717000  | 1.286193000  | -4.583655000 |
| 6  | 2.271888000  | -1.185231000 | -3.211890000 |
| 1  | 3.232550000  | 0.014528000  | -4.745148000 |
| 1  | 1.565253000  | 1.432689000  | -2.583093000 |
| 1  | 2.517171000  | 2.260599000  | -3.814997000 |
| 1  | 1.096603000  | 1.243568000  | -5.626460000 |
| 1  | 0.127091000  | 0.401705000  | -4.403218000 |
| 1  | 0.110801000  | 2.168573000  | -4.468673000 |
| 1  | 2.991109000  | -2.012095000 | -3.270135000 |

|   |              |              |              |
|---|--------------|--------------|--------------|
| 1 | 1.393529000  | -1.464115000 | -3.805281000 |
| 1 | 1.947393000  | -1.091955000 | -2.167763000 |
| 6 | -1.653145000 | 5.954639000  | -2.311291000 |
| 6 | -0.511332000 | 5.990093000  | -1.263897000 |
| 6 | 0.837555000  | 5.461565000  | -1.785807000 |
| 6 | 1.920598000  | 5.434607000  | -0.692877000 |
| 7 | 1.545463000  | 4.486684000  | 0.371620000  |
| 6 | 1.674632000  | 4.705755000  | 1.686082000  |
| 7 | 2.489350000  | 5.684932000  | 2.148632000  |
| 7 | 0.975905000  | 3.952749000  | 2.558532000  |
| 6 | -1.939722000 | 4.549974000  | -2.828215000 |
| 8 | -1.384962000 | 4.145889000  | -3.892318000 |
| 1 | -1.368335000 | 6.549101000  | -3.185056000 |
| 1 | -0.804837000 | 5.406624000  | -0.382206000 |
| 1 | -0.387116000 | 7.028884000  | -0.923847000 |
| 1 | 0.712185000  | 4.455380000  | -2.202923000 |
| 1 | 1.194010000  | 6.093530000  | -2.610147000 |
| 1 | 2.891556000  | 5.156017000  | -1.118271000 |
| 1 | 2.036000000  | 6.428251000  | -0.246175000 |
| 1 | 1.158407000  | 3.565971000  | 0.072347000  |
| 1 | 3.306091000  | 5.974972000  | 1.609821000  |
| 1 | 2.469238000  | 5.926122000  | 3.128418000  |
| 1 | 0.218465000  | 3.316670000  | 2.235889000  |
| 1 | 1.250806000  | 3.933365000  | 3.528346000  |
| 7 | -2.764403000 | 3.751834000  | -2.103494000 |
| 6 | -3.041832000 | 2.351702000  | -2.523072000 |
| 6 | -4.224335000 | 1.930728000  | -1.634306000 |
| 6 | -4.023962000 | 2.760294000  | -0.346003000 |
| 6 | -3.483716000 | 4.112460000  | -0.855282000 |
| 1 | -2.149077000 | 1.739799000  | -2.345014000 |
| 1 | -5.171011000 | 2.203154000  | -2.118701000 |
| 1 | -4.242208000 | 0.852064000  | -1.454431000 |
| 1 | -4.946340000 | 2.881325000  | 0.230580000  |
| 1 | -3.277284000 | 2.290883000  | 0.303825000  |
| 1 | -2.812551000 | 4.581159000  | -0.130613000 |
| 1 | -4.300406000 | 4.815009000  | -1.076599000 |
| 6 | -2.166869000 | 0.416978000  | -9.530988000 |
| 6 | -2.837579000 | 1.454171000  | -8.654794000 |
| 6 | -4.163334000 | 1.853707000  | -8.900435000 |
| 6 | -4.791366000 | 2.798148000  | -8.079831000 |
| 6 | -4.101760000 | 3.358273000  | -6.996224000 |
| 6 | -2.779911000 | 2.972112000  | -6.735671000 |
| 6 | -2.158428000 | 2.028619000  | -7.564702000 |
| 1 | -1.080979000 | 0.558891000  | -9.557718000 |
| 1 | -2.354976000 | -0.601469000 | -9.163240000 |
| 1 | -4.702402000 | 1.425974000  | -9.741752000 |
| 1 | -5.812050000 | 3.102902000  | -8.293770000 |
| 1 | -4.584609000 | 4.097209000  | -6.363907000 |
| 1 | -2.238851000 | 3.399955000  | -5.896024000 |
| 1 | -1.128920000 | 1.742301000  | -7.364881000 |

|   |              |              |               |
|---|--------------|--------------|---------------|
| 6 | -5.530485000 | -4.926666000 | -0.047513000  |
| 6 | -4.299415000 | -5.050674000 | -0.671285000  |
| 6 | -3.305636000 | -6.047073000 | -0.339987000  |
| 6 | -2.276243000 | -5.901429000 | -1.226155000  |
| 6 | -2.620782000 | -4.808315000 | -2.106972000  |
| 7 | -3.853497000 | -4.287010000 | -1.739940000  |
| 6 | -1.836731000 | -4.363668000 | -3.158241000  |
| 6 | -2.164931000 | -3.313044000 | -4.000261000  |
| 6 | -1.308609000 | -2.803925000 | -5.047748000  |
| 6 | -1.945737000 | -1.730419000 | -5.604739000  |
| 6 | -3.205456000 | -1.575439000 | -4.913553000  |
| 7 | -3.326145000 | -2.556236000 | -3.941653000  |
| 6 | -4.134892000 | -0.586104000 | -5.192743000  |
| 6 | -5.353531000 | -0.451928000 | -4.550141000  |
| 6 | -6.350425000 | 0.540191000  | -4.891303000  |
| 6 | -7.431035000 | 0.315931000  | -4.086663000  |
| 6 | -7.106018000 | -0.810478000 | -3.237377000  |
| 7 | -5.828296000 | -1.258251000 | -3.527879000  |
| 6 | -7.955880000 | -1.350294000 | -2.286535000  |
| 6 | -7.638491000 | -2.415059000 | -1.458327000  |
| 6 | -8.494495000 | -2.922254000 | -0.409989000  |
| 6 | -7.806782000 | -3.915513000 | 0.229129000   |
| 6 | -6.523075000 | -4.035865000 | -0.423851000  |
| 7 | -6.445849000 | -3.122829000 | -1.467381000  |
| 1 | -5.740142000 | -5.589009000 | 0.785020000   |
| 1 | -0.889416000 | -4.863873000 | -3.325338000  |
| 1 | -3.896640000 | 0.121553000  | -5.978468000  |
| 1 | -8.932132000 | -0.893768000 | -2.166478000  |
| 8 | -0.857291000 | 2.162169000  | 1.531208000   |
| 6 | -0.357651000 | 1.622842000  | 0.504627000   |
| 8 | 0.586259000  | 1.967705000  | -0.270619000  |
| 6 | -1.252346000 | -0.639347000 | -0.068322000  |
| 6 | -1.863692000 | -1.194812000 | 1.016393000   |
| 1 | -1.832557000 | -0.120836000 | -0.820949000  |
| 1 | -0.221199000 | -0.843923000 | -0.334217000  |
| 1 | -2.924340000 | -0.995940000 | 1.164335000   |
| 8 | -4.130079000 | -1.607496000 | -1.457653000  |
| 1 | -2.538931000 | 0.461192000  | -10.560482000 |
| 1 | 3.795631000  | 0.342609000  | -3.108968000  |
| 1 | -3.262191000 | 2.318173000  | -3.592209000  |
| 1 | -2.553891000 | 6.405395000  | -1.877557000  |
| 1 | 7.690522000  | 4.470893000  | 0.119180000   |
| 1 | 7.324600000  | 7.816445000  | 2.878362000   |
| 1 | -8.122605000 | -4.515521000 | 1.070157000   |
| 1 | -3.402064000 | -6.762223000 | 0.463744000   |
| 1 | -8.369685000 | 0.850135000  | -4.058703000  |
| 1 | -9.483983000 | -2.546081000 | -0.194368000  |
| 1 | -1.361483000 | -6.472149000 | -1.290915000  |
| 1 | -0.343316000 | -3.216939000 | -5.301436000  |
| 1 | -6.218310000 | 1.290904000  | -5.656569000  |

|   |              |              |              |
|---|--------------|--------------|--------------|
| 1 | -1.607360000 | -1.084839000 | -6.401225000 |
| 6 | -1.228953000 | -1.989885000 | 2.068110000  |
| 6 | -2.029836000 | -2.565129000 | 3.081607000  |
| 6 | 0.166327000  | -2.216572000 | 2.129484000  |
| 6 | -1.469709000 | -3.338824000 | 4.099766000  |
| 1 | -3.103409000 | -2.397769000 | 3.058226000  |
| 6 | 0.725111000  | -2.990578000 | 3.147172000  |
| 1 | 0.813468000  | -1.773535000 | 1.379799000  |
| 6 | -0.086975000 | -3.559359000 | 4.138736000  |
| 1 | -2.110652000 | -3.769496000 | 4.863877000  |
| 1 | 1.799659000  | -3.150036000 | 3.170854000  |
| 1 | 0.351487000  | -4.161039000 | 4.929075000  |
| 1 | -3.354579000 | -1.935807000 | -0.949063000 |

<sup>4</sup>Pr<sub>DC,beta,S1</sub>

|    |              |              |              |
|----|--------------|--------------|--------------|
| 26 | -5.100398000 | -2.583924000 | -2.236374000 |
| 16 | -5.808069000 | -4.195370000 | -3.809943000 |
| 1  | -7.064620000 | -4.430603000 | -3.285819000 |
| 6  | 6.681701000  | 4.656574000  | 0.576112000  |
| 6  | 6.583452000  | 3.237122000  | 1.199126000  |
| 6  | 5.160875000  | 2.627235000  | 1.238762000  |
| 6  | 4.614830000  | 2.334923000  | -0.172704000 |
| 6  | 5.162688000  | 1.341525000  | 2.090000000  |
| 6  | 5.984933000  | 5.729258000  | 1.395152000  |
| 8  | 4.849876000  | 6.181445000  | 1.084009000  |
| 1  | 6.228299000  | 4.665294000  | -0.417312000 |
| 1  | 7.237910000  | 2.568838000  | 0.621603000  |
| 1  | 6.994122000  | 3.265731000  | 2.219861000  |
| 1  | 4.491464000  | 3.352775000  | 1.725259000  |
| 1  | 3.596779000  | 1.933540000  | -0.129180000 |
| 1  | 4.578632000  | 3.235411000  | -0.795872000 |
| 1  | 5.247278000  | 1.596544000  | -0.683981000 |
| 1  | 4.156872000  | 0.911382000  | 2.147965000  |
| 1  | 5.511204000  | 1.536380000  | 3.112723000  |
| 1  | 5.823483000  | 0.583249000  | 1.649536000  |
| 7  | 6.661374000  | 6.174447000  | 2.495697000  |
| 6  | 6.183372000  | 7.242198000  | 3.378384000  |
| 6  | 5.986412000  | 6.800399000  | 4.850299000  |
| 6  | 4.788793000  | 5.905367000  | 5.105207000  |
| 6  | 3.543441000  | 6.466122000  | 5.446929000  |
| 6  | 2.434932000  | 5.651777000  | 5.712698000  |
| 6  | 2.554207000  | 4.256152000  | 5.634158000  |
| 6  | 3.785764000  | 3.686533000  | 5.285387000  |
| 6  | 4.891666000  | 4.505587000  | 5.027842000  |
| 1  | 7.581009000  | 5.794711000  | 2.674149000  |
| 1  | 5.245238000  | 7.604172000  | 2.951801000  |
| 1  | 6.903508000  | 6.303826000  | 5.195508000  |
| 1  | 5.888012000  | 7.714572000  | 5.449674000  |
| 1  | 3.448641000  | 7.545603000  | 5.530101000  |
| 1  | 1.491060000  | 6.102294000  | 6.004328000  |

|   |              |              |              |
|---|--------------|--------------|--------------|
| 1 | 1.706469000  | 3.620844000  | 5.873775000  |
| 1 | 3.889188000  | 2.607847000  | 5.228900000  |
| 1 | 5.847357000  | 4.052884000  | 4.781850000  |
| 6 | 3.104152000  | 0.292298000  | -3.836337000 |
| 6 | 2.132085000  | 1.481588000  | -3.991335000 |
| 6 | 0.842949000  | 1.152312000  | -4.762400000 |
| 6 | 2.560032000  | -0.832780000 | -2.938063000 |
| 1 | 3.353743000  | -0.112500000 | -4.829906000 |
| 1 | 1.859998000  | 1.844681000  | -2.991855000 |
| 1 | 2.653304000  | 2.303567000  | -4.504636000 |
| 1 | 1.069223000  | 0.827902000  | -5.788803000 |
| 1 | 0.280220000  | 0.350062000  | -4.270275000 |
| 1 | 0.190477000  | 2.031136000  | -4.806333000 |
| 1 | 3.310729000  | -1.618984000 | -2.785268000 |
| 1 | 1.670515000  | -1.303828000 | -3.372222000 |
| 1 | 2.271033000  | -0.431159000 | -1.959212000 |
| 6 | -1.447963000 | 6.014350000  | -2.596474000 |
| 6 | -0.353902000 | 6.101553000  | -1.501990000 |
| 6 | 1.021100000  | 5.568028000  | -1.943890000 |
| 6 | 2.021249000  | 5.490085000  | -0.776741000 |
| 7 | 1.593386000  | 4.466880000  | 0.194292000  |
| 6 | 1.614879000  | 4.596887000  | 1.526048000  |
| 7 | 2.318422000  | 5.593833000  | 2.116294000  |
| 7 | 0.919522000  | 3.732086000  | 2.292828000  |
| 6 | -1.713562000 | 4.582303000  | -3.048141000 |
| 8 | -1.141784000 | 4.131951000  | -4.084005000 |
| 1 | -1.123721000 | 6.561847000  | -3.486879000 |
| 1 | -0.680342000 | 5.544293000  | -0.614815000 |
| 1 | -0.253861000 | 7.152135000  | -1.191990000 |
| 1 | 0.913447000  | 4.577031000  | -2.401131000 |
| 1 | 1.443836000  | 6.219948000  | -2.719984000 |
| 1 | 3.026363000  | 5.254976000  | -1.145258000 |
| 1 | 2.083384000  | 6.455255000  | -0.262819000 |
| 1 | 1.288252000  | 3.547313000  | -0.191421000 |
| 1 | 3.147645000  | 5.980175000  | 1.664090000  |
| 1 | 2.214060000  | 5.755827000  | 3.107027000  |
| 1 | 0.265605000  | 3.036790000  | 1.881081000  |
| 1 | 1.129256000  | 3.668342000  | 3.276993000  |
| 7 | -2.533419000 | 3.812154000  | -2.288325000 |
| 6 | -2.777859000 | 2.380543000  | -2.621029000 |
| 6 | -3.964062000 | 1.995324000  | -1.721285000 |
| 6 | -3.788021000 | 2.907175000  | -0.487370000 |
| 6 | -3.295192000 | 4.238706000  | -1.087494000 |
| 1 | -1.876689000 | 1.799410000  | -2.390410000 |
| 1 | -4.909568000 | 2.223822000  | -2.230401000 |
| 1 | -3.975598000 | 0.931606000  | -1.468716000 |
| 1 | -4.710479000 | 3.032626000  | 0.088079000  |
| 1 | -3.019323000 | 2.496500000  | 0.177381000  |
| 1 | -2.664218000 | 4.798187000  | -0.391674000 |
| 1 | -4.137896000 | 4.882481000  | -1.380049000 |



|   |              |              |              |
|---|--------------|--------------|--------------|
| 6 | -2.259789000 | -0.100260000 | -9.165062000 |
| 6 | -2.836126000 | 1.144604000  | -8.524090000 |
| 6 | -4.077771000 | 1.657638000  | -8.940753000 |
| 6 | -4.623034000 | 2.795501000  | -8.335236000 |
| 6 | -3.934010000 | 3.440455000  | -7.299024000 |
| 6 | -2.695135000 | 2.944910000  | -6.872117000 |
| 6 | -2.155290000 | 1.806430000  | -7.486565000 |
| 1 | -1.174531000 | -0.152800000 | -9.028175000 |
| 1 | -2.690678000 | -1.011819000 | -8.728254000 |
| 1 | -4.616505000 | 1.164171000  | -9.745666000 |
| 1 | -5.579654000 | 3.181113000  | -8.676470000 |
| 1 | -4.354630000 | 4.326116000  | -6.832365000 |
| 1 | -2.150675000 | 3.433699000  | -6.068773000 |
| 1 | -1.187326000 | 1.435992000  | -7.159233000 |
| 6 | -6.525287000 | -4.396558000 | 0.325713000  |
| 6 | -5.218217000 | -4.700042000 | -0.020823000 |
| 6 | -4.428189000 | -5.748156000 | 0.585293000  |
| 6 | -3.224681000 | -5.773314000 | -0.062663000 |
| 6 | -3.260720000 | -4.740463000 | -1.072423000 |
| 7 | -4.480994000 | -4.081618000 | -1.019769000 |
| 6 | -2.234879000 | -4.473744000 | -1.963799000 |
| 6 | -2.281139000 | -3.509920000 | -2.957518000 |
| 6 | -1.192025000 | -3.210578000 | -3.859727000 |
| 6 | -1.601558000 | -2.181850000 | -4.660284000 |
| 6 | -2.947374000 | -1.837720000 | -4.259325000 |
| 7 | -3.349905000 | -2.666674000 | -3.224767000 |
| 6 | -3.697332000 | -0.818007000 | -4.824167000 |
| 6 | -4.983223000 | -0.481700000 | -4.438150000 |
| 6 | -5.774665000 | 0.561631000  | -5.056201000 |
| 6 | -6.989411000 | 0.563132000  | -4.432207000 |
| 6 | -6.956339000 | -0.475776000 | -3.424342000 |
| 7 | -5.718276000 | -1.095518000 | -3.436004000 |
| 6 | -8.016451000 | -0.800887000 | -2.595548000 |
| 6 | -7.990557000 | -1.801376000 | -1.637192000 |
| 6 | -9.082710000 | -2.105530000 | -0.740967000 |
| 6 | -8.662237000 | -3.111685000 | 0.082834000  |
| 6 | -7.307436000 | -3.438936000 | -0.298908000 |
| 7 | -6.918961000 | -2.639160000 | -1.366257000 |
| 1 | -6.972448000 | -4.957246000 | 1.139160000  |
| 1 | -1.325637000 | -5.056272000 | -1.871078000 |
| 1 | -3.247445000 | -0.242169000 | -5.625301000 |
| 1 | -8.930372000 | -0.226344000 | -2.698025000 |
| 8 | -0.612103000 | 1.750481000  | 1.093322000  |
| 6 | -0.020306000 | 1.390248000  | 0.026927000  |
| 8 | 0.890092000  | 1.944162000  | -0.661723000 |
| 6 | -2.707996000 | -1.059279000 | 1.855895000  |
| 6 | -2.317846000 | -2.345922000 | 1.934643000  |
| 1 | -3.725021000 | -0.777061000 | 2.113145000  |
| 1 | -2.042897000 | -0.247966000 | 1.571046000  |
| 1 | -3.039711000 | -3.089903000 | 2.273051000  |

|   |               |              |               |
|---|---------------|--------------|---------------|
| 8 | -4.473338000  | -1.364782000 | -1.055335000  |
| 1 | -2.466256000  | -0.130161000 | -10.240946000 |
| 1 | 4.049031000   | 0.661735000  | -3.409218000  |
| 1 | -2.984662000  | 2.276648000  | -3.688359000  |
| 1 | -2.366547000  | 6.487097000  | -2.228049000  |
| 1 | 7.740786000   | 4.922240000  | 0.456735000   |
| 1 | 6.904713000   | 8.069343000  | 3.352718000   |
| 1 | -9.204031000  | -3.592858000 | 0.884140000   |
| 1 | -4.769728000  | -6.381435000 | 1.391292000   |
| 1 | -7.842233000  | 1.197288000  | -4.626604000  |
| 1 | -10.036643000 | -1.598498000 | -0.747345000  |
| 1 | -2.379907000  | -6.422401000 | 0.113125000   |
| 1 | -0.240972000  | -3.722361000 | -3.858663000  |
| 1 | -5.428585000  | 1.192425000  | -5.862248000  |
| 1 | -1.052894000  | -1.682044000 | -5.444431000  |
| 6 | -0.977953000  | -2.885881000 | 1.634957000   |
| 6 | -0.651108000  | -4.186745000 | 2.070740000   |
| 6 | -0.003706000  | -2.156605000 | 0.920497000   |
| 6 | 0.608470000   | -4.738672000 | 1.819162000   |
| 1 | -1.394812000  | -4.763363000 | 2.614034000   |
| 6 | 1.252868000   | -2.710728000 | 0.666169000   |
| 1 | -0.231006000  | -1.161964000 | 0.548649000   |
| 6 | 1.567245000   | -4.001356000 | 1.114631000   |
| 1 | 0.840009000   | -5.740183000 | 2.170279000   |
| 1 | 1.983946000   | -2.135726000 | 0.105973000   |
| 1 | 2.544824000   | -4.428177000 | 0.911160000   |
| 1 | -3.867696000  | -1.692696000 | -0.351954000  |

#### Full Substrate (S1)

|   |              |              |              |
|---|--------------|--------------|--------------|
| 8 | -1.072147000 | 1.620148000  | 1.618017000  |
| 6 | -0.632921000 | 1.324598000  | 0.441572000  |
| 8 | -0.044122000 | 2.085219000  | -0.396749000 |
| 6 | -0.868848000 | -0.145887000 | -0.052808000 |
| 6 | -1.483180000 | -1.093578000 | 1.003049000  |
| 1 | -1.542288000 | -0.082323000 | -0.921311000 |
| 1 | 0.085256000  | -0.534350000 | -0.433274000 |
| 1 | -2.203029000 | -0.486823000 | 1.566980000  |
| 6 | -0.485117000 | -1.697748000 | 1.972855000  |
| 6 | 0.191245000  | -0.882427000 | 2.905378000  |
| 6 | -0.207395000 | -3.076158000 | 1.969050000  |
| 6 | 1.110550000  | -1.440668000 | 3.798952000  |
| 1 | -0.030157000 | 0.183167000  | 2.887685000  |
| 6 | 0.714003000  | -3.635198000 | 2.864972000  |
| 1 | -0.721554000 | -3.717151000 | 1.255595000  |
| 6 | 1.377682000  | -2.817727000 | 3.786118000  |
| 1 | 1.623575000  | -0.797534000 | 4.510193000  |
| 1 | 0.911154000  | -4.704860000 | 2.842312000  |
| 1 | 2.093759000  | -3.246044000 | 4.483630000  |

|   |              |              |             |
|---|--------------|--------------|-------------|
| 1 | -2.028747000 | -1.911420000 | 0.508318000 |
|---|--------------|--------------|-------------|

Substrate\_S1\_C2\_alpha (Phenyl\_Propionic\_acid\_non\_fix remove\_alpha)

|   |              |              |              |
|---|--------------|--------------|--------------|
| 8 | -1.034698000 | 1.678937000  | 1.605333000  |
| 6 | -0.649794000 | 1.361896000  | 0.402710000  |
| 8 | -0.233629000 | 2.157274000  | -0.519832000 |
| 6 | -0.693905000 | -0.085312000 | 0.060825000  |
| 6 | -1.367246000 | -1.081229000 | 0.966498000  |
| 1 | -0.166870000 | -0.430262000 | -0.827840000 |
| 1 | -2.132782000 | -0.527525000 | 1.526199000  |
| 6 | -0.417201000 | -1.722343000 | 1.977877000  |
| 6 | 0.235172000  | -0.906844000 | 2.925571000  |
| 6 | -0.170420000 | -3.104328000 | 1.992457000  |
| 6 | 1.101898000  | -1.473443000 | 3.864081000  |
| 1 | 0.034507000  | 0.163413000  | 2.882922000  |
| 6 | 0.702460000  | -3.670850000 | 2.932406000  |
| 1 | -0.667373000 | -3.740915000 | 1.263099000  |
| 6 | 1.341050000  | -2.856629000 | 3.873707000  |
| 1 | 1.597103000  | -0.834413000 | 4.591346000  |
| 1 | 0.881724000  | -4.743832000 | 2.927375000  |
| 1 | 2.018671000  | -3.291837000 | 4.604428000  |
| 1 | -1.855771000 | -1.880168000 | 0.387347000  |

Substrate\_S1\_C3\_beta (Phenyl\_Propionic\_acid\_non\_fix remove\_beta)

|   |              |              |              |
|---|--------------|--------------|--------------|
| 8 | -0.620563000 | 1.758773000  | 1.656007000  |
| 6 | -1.285028000 | 1.303022000  | 0.665547000  |
| 8 | -2.393585000 | 1.673005000  | 0.171057000  |
| 6 | -0.578528000 | 0.046313000  | -0.089379000 |
| 6 | -0.834468000 | -1.265047000 | 0.543781000  |
| 1 | -0.961464000 | 0.057427000  | -1.113606000 |
| 1 | 0.492082000  | 0.287680000  | -0.097396000 |
| 6 | -0.167615000 | -1.781608000 | 1.688845000  |
| 6 | 0.742448000  | -0.992519000 | 2.465045000  |
| 6 | -0.376557000 | -3.133529000 | 2.108319000  |
| 6 | 1.411520000  | -1.546078000 | 3.552584000  |
| 1 | 0.827048000  | 0.065139000  | 2.231511000  |
| 6 | 0.303662000  | -3.672056000 | 3.195785000  |
| 1 | -1.079028000 | -3.748090000 | 1.548657000  |
| 6 | 1.214451000  | -2.888368000 | 3.926546000  |
| 1 | 2.087013000  | -0.921585000 | 4.133398000  |
| 1 | 0.127337000  | -4.706894000 | 3.482990000  |
| 1 | 1.745167000  | -3.309213000 | 4.776667000  |
| 1 | -1.624169000 | -1.883017000 | 0.116088000  |

## Model-S2 Data

<sup>2</sup>Res<sub>2</sub>

|    |              |              |              |
|----|--------------|--------------|--------------|
| 26 | -5.729708000 | -2.246379000 | -2.764438000 |
| 16 | -6.738951000 | -3.636785000 | -4.659268000 |
| 1  | -7.327950000 | -2.605293000 | -5.366764000 |
| 6  | 5.499283000  | 5.316562000  | 0.486911000  |
| 6  | 5.717428000  | 3.817377000  | 0.850058000  |
| 6  | 4.420197000  | 2.985687000  | 1.008514000  |
| 6  | 3.736947000  | 2.722243000  | -0.348210000 |
| 6  | 4.726722000  | 1.653284000  | 1.721564000  |
| 6  | 5.102638000  | 6.156589000  | 1.685530000  |
| 8  | 3.911607000  | 6.241117000  | 2.097299000  |
| 1  | 4.710576000  | 5.408056000  | -0.265254000 |
| 1  | 6.331603000  | 3.361770000  | 0.060264000  |
| 1  | 6.305856000  | 3.761078000  | 1.776626000  |
| 1  | 3.726863000  | 3.559133000  | 1.639787000  |
| 1  | 2.769538000  | 2.226223000  | -0.216121000 |
| 1  | 3.552834000  | 3.648889000  | -0.905850000 |
| 1  | 4.368450000  | 2.077620000  | -0.974699000 |
| 1  | 3.821850000  | 1.042508000  | 1.815559000  |
| 1  | 5.137404000  | 1.823020000  | 2.724926000  |
| 1  | 5.460442000  | 1.067491000  | 1.151301000  |
| 7  | 6.121335000  | 6.796103000  | 2.327588000  |
| 6  | 5.944256000  | 7.575253000  | 3.555999000  |
| 6  | 6.849803000  | 7.104196000  | 4.708870000  |
| 6  | 6.713289000  | 5.647762000  | 5.129307000  |
| 6  | 5.500601000  | 4.943415000  | 5.035757000  |
| 6  | 5.409875000  | 3.616061000  | 5.473278000  |
| 6  | 6.526548000  | 2.969884000  | 6.014717000  |
| 6  | 7.740304000  | 3.660026000  | 6.110732000  |
| 6  | 7.829959000  | 4.983361000  | 5.667837000  |
| 1  | 7.057986000  | 6.693209000  | 1.963317000  |
| 1  | 4.887060000  | 7.499643000  | 3.817022000  |
| 1  | 7.899296000  | 7.298537000  | 4.445267000  |
| 1  | 6.638754000  | 7.758817000  | 5.568798000  |
| 1  | 4.625498000  | 5.414802000  | 4.601021000  |
| 1  | 4.466300000  | 3.086204000  | 5.385895000  |
| 1  | 6.453339000  | 1.941034000  | 6.351878000  |
| 1  | 8.615809000  | 3.168393000  | 6.523312000  |
| 1  | 8.777748000  | 5.510722000  | 5.741824000  |
| 6  | 2.027764000  | 1.902362000  | -4.114089000 |
| 6  | 0.836462000  | 2.712058000  | -3.558769000 |
| 6  | -0.460235000 | 2.576470000  | -4.375228000 |
| 6  | 1.845049000  | 0.377211000  | -4.024879000 |
| 1  | 2.205992000  | 2.190719000  | -5.162613000 |
| 1  | 0.645817000  | 2.410832000  | -2.519098000 |
| 1  | 1.120121000  | 3.774969000  | -3.528992000 |
| 1  | -0.297735000 | 2.865648000  | -5.423741000 |
| 1  | -0.831483000 | 1.543479000  | -4.369283000 |

|   |              |              |              |
|---|--------------|--------------|--------------|
| 1 | -1.245268000 | 3.218277000  | -3.961055000 |
| 1 | 2.729626000  | -0.152372000 | -4.401211000 |
| 1 | 0.981726000  | 0.041516000  | -4.612434000 |
| 1 | 1.684755000  | 0.067388000  | -2.984840000 |
| 6 | -2.724891000 | 6.262860000  | -0.768229000 |
| 6 | -1.468942000 | 6.154084000  | 0.134126000  |
| 6 | -0.183745000 | 5.771917000  | -0.621737000 |
| 6 | 0.999182000  | 5.501307000  | 0.326263000  |
| 7 | 0.730547000  | 4.320102000  | 1.162283000  |
| 6 | 0.827221000  | 4.271212000  | 2.493988000  |
| 7 | 1.525088000  | 5.217379000  | 3.182232000  |
| 7 | 0.214025000  | 3.276145000  | 3.163284000  |
| 6 | -3.015759000 | 4.970772000  | -1.522353000 |
| 8 | -2.593456000 | 4.815848000  | -2.702461000 |
| 1 | -2.565200000 | 7.031810000  | -1.530498000 |
| 1 | -1.647258000 | 5.410452000  | 0.920939000  |
| 1 | -1.321970000 | 7.118230000  | 0.643011000  |
| 1 | -0.359547000 | 4.884867000  | -1.240808000 |
| 1 | 0.100095000  | 6.578474000  | -1.311639000 |
| 1 | 1.913586000  | 5.336854000  | -0.254869000 |
| 1 | 1.176956000  | 6.365734000  | 0.973540000  |
| 1 | 0.409050000  | 3.437579000  | 0.669782000  |
| 1 | 2.306259000  | 5.709274000  | 2.748981000  |
| 1 | 1.398567000  | 5.300662000  | 4.177374000  |
| 1 | -0.369971000 | 2.556705000  | 2.653570000  |
| 1 | 0.482192000  | 3.081171000  | 4.115362000  |
| 7 | -3.694068000 | 3.985595000  | -0.873834000 |
| 6 | -3.935476000 | 2.672914000  | -1.528322000 |
| 6 | -4.936277000 | 1.979738000  | -0.588550000 |
| 6 | -4.579402000 | 2.556271000  | 0.799489000  |
| 6 | -4.251904000 | 4.032948000  | 0.499803000  |
| 1 | -2.987495000 | 2.124830000  | -1.599570000 |
| 1 | -5.962759000 | 2.260557000  | -0.860301000 |
| 1 | -4.870541000 | 0.889829000  | -0.636518000 |
| 1 | -5.389375000 | 2.453304000  | 1.528140000  |
| 1 | -3.690323000 | 2.057414000  | 1.203500000  |
| 1 | -3.531932000 | 4.447640000  | 1.209927000  |
| 1 | -5.158249000 | 4.656383000  | 0.525129000  |
| 6 | -1.546632000 | -3.564099000 | -8.134663000 |
| 6 | -1.526009000 | -2.051302000 | -8.158537000 |
| 6 | -2.640405000 | -1.320241000 | -8.604371000 |
| 6 | -2.634049000 | 0.079908000  | -8.595334000 |
| 6 | -1.509281000 | 0.776404000  | -8.136751000 |
| 6 | -0.389209000 | 0.060691000  | -7.693193000 |
| 6 | -0.398937000 | -1.338987000 | -7.708508000 |
| 1 | -0.563561000 | -3.982756000 | -8.378102000 |
| 1 | -1.824908000 | -3.938492000 | -7.140102000 |
| 1 | -3.518065000 | -1.852779000 | -8.959847000 |
| 1 | -3.504551000 | 0.624093000  | -8.949169000 |
| 1 | -1.500048000 | 1.861695000  | -8.130410000 |

|   |               |              |              |
|---|---------------|--------------|--------------|
| 1 | 0.489426000   | 0.591447000  | -7.340480000 |
| 1 | 0.479015000   | -1.886422000 | -7.374982000 |
| 6 | -8.205919000  | -3.849640000 | -0.993463000 |
| 6 | -6.960127000  | -4.458392000 | -1.044806000 |
| 6 | -6.620837000  | -5.695069000 | -0.372386000 |
| 6 | -5.318745000  | -5.970839000 | -0.674270000 |
| 6 | -4.847815000  | -4.903328000 | -1.530741000 |
| 7 | -5.865722000  | -3.987018000 | -1.749496000 |
| 6 | -3.569113000  | -4.812563000 | -2.054327000 |
| 6 | -3.108279000  | -3.791758000 | -2.876143000 |
| 6 | -1.771287000  | -3.721853000 | -3.424673000 |
| 6 | -1.708791000  | -2.583562000 | -4.178913000 |
| 6 | -3.007221000  | -1.950943000 | -4.093967000 |
| 7 | -3.851603000  | -2.703693000 | -3.296398000 |
| 6 | -3.340950000  | -0.761255000 | -4.726847000 |
| 6 | -4.578926000  | -0.141396000 | -4.657162000 |
| 6 | -4.910480000  | 1.107307000  | -5.309460000 |
| 6 | -6.214623000  | 1.379482000  | -5.008251000 |
| 6 | -6.690781000  | 0.297846000  | -4.171718000 |
| 7 | -5.678920000  | -0.623958000 | -3.965594000 |
| 6 | -7.982429000  | 0.196558000  | -3.669250000 |
| 6 | -8.458655000  | -0.839843000 | -2.884810000 |
| 6 | -9.802261000  | -0.930889000 | -2.357335000 |
| 6 | -9.863078000  | -2.067307000 | -1.603259000 |
| 6 | -8.558658000  | -2.689496000 | -1.660244000 |
| 7 | -7.711112000  | -1.937065000 | -2.466739000 |
| 1 | -8.969730000  | -4.329543000 | -0.390749000 |
| 1 | -2.868768000  | -5.601696000 | -1.801927000 |
| 1 | -2.573612000  | -0.279800000 | -5.323131000 |
| 1 | -8.674850000  | 0.995491000  | -3.913166000 |
| 8 | -1.022913000  | 1.303892000  | 1.838785000  |
| 6 | -0.545085000  | 1.101705000  | 0.654670000  |
| 8 | 0.070917000   | 2.005322000  | -0.031998000 |
| 6 | -0.654546000  | -0.295200000 | 0.025951000  |
| 6 | -2.007952000  | -1.020060000 | 0.298615000  |
| 6 | -2.252929000  | -1.522854000 | 1.729120000  |
| 1 | -0.598481000  | -0.124514000 | -1.055445000 |
| 1 | -2.820436000  | -0.342933000 | 0.008167000  |
| 1 | -2.063804000  | -1.870246000 | -0.395431000 |
| 1 | -2.226085000  | -0.691270000 | 2.436878000  |
| 1 | -1.496226000  | -2.256879000 | 2.030748000  |
| 8 | -5.302203000  | -1.369475000 | -1.419253000 |
| 1 | -2.272478000  | -3.965836000 | -8.849043000 |
| 1 | 2.936493000   | 2.180206000  | -3.559844000 |
| 1 | -4.310902000  | 2.823964000  | -2.543338000 |
| 1 | -3.584307000  | 6.567524000  | -0.158318000 |
| 1 | 6.418542000   | 5.721359000  | 0.044649000  |
| 1 | 6.151143000   | 8.634127000  | 3.353055000  |
| 1 | -10.703898000 | -2.459716000 | -1.050225000 |
| 1 | -7.302601000  | -6.265523000 | 0.241180000  |

|   |               |              |              |
|---|---------------|--------------|--------------|
| 1 | -6.810699000  | 2.226480000  | -5.314904000 |
| 1 | -10.583239000 | -0.208158000 | -2.543529000 |
| 1 | -4.719549000  | -6.811430000 | -0.356394000 |
| 1 | -0.996404000  | -4.452815000 | -3.246029000 |
| 1 | -4.221834000  | 1.683503000  | -5.908727000 |
| 1 | -0.877667000  | -2.192899000 | -4.746766000 |
| 6 | 0.552176000   | -1.157246000 | 0.402362000  |
| 6 | 1.094622000   | -2.042528000 | -0.546229000 |
| 6 | 1.126549000   | -1.121792000 | 1.686322000  |
| 6 | 2.177776000   | -2.868735000 | -0.225904000 |
| 1 | 0.660506000   | -2.081824000 | -1.541833000 |
| 6 | 2.211442000   | -1.945994000 | 2.007709000  |
| 1 | 0.713554000   | -0.444916000 | 2.426435000  |
| 6 | 2.742170000   | -2.823073000 | 1.053994000  |
| 1 | 2.583839000   | -3.541652000 | -0.975922000 |
| 1 | 2.640070000   | -1.905724000 | 3.005273000  |
| 1 | 3.584663000   | -3.460853000 | 1.304414000  |
| 1 | -3.234617000  | -2.009051000 | 1.787377000  |

#### <sup>4</sup>Res2

|    |              |              |              |
|----|--------------|--------------|--------------|
| 26 | -5.749869000 | -2.234428000 | -2.743484000 |
| 16 | -6.752732000 | -3.635226000 | -4.657487000 |
| 1  | -7.378416000 | -2.609339000 | -5.341651000 |
| 6  | 5.526500000  | 5.282143000  | 0.486305000  |
| 6  | 5.734620000  | 3.781777000  | 0.850520000  |
| 6  | 4.431871000  | 2.958693000  | 1.008716000  |
| 6  | 3.747358000  | 2.699519000  | -0.348192000 |
| 6  | 4.729400000  | 1.624421000  | 1.722090000  |
| 6  | 5.132644000  | 6.125089000  | 1.683753000  |
| 8  | 3.941494000  | 6.215615000  | 2.093942000  |
| 1  | 4.739818000  | 5.378136000  | -0.267415000 |
| 1  | 6.346253000  | 3.321716000  | 0.061336000  |
| 1  | 6.322146000  | 3.722242000  | 1.777448000  |
| 1  | 3.742156000  | 3.536798000  | 1.639688000  |
| 1  | 2.776590000  | 2.210064000  | -0.216374000 |
| 1  | 3.569612000  | 3.627191000  | -0.906208000 |
| 1  | 4.374717000  | 2.050461000  | -0.974277000 |
| 1  | 3.820508000  | 1.019637000  | 1.816141000  |
| 1  | 5.141023000  | 1.791634000  | 2.725486000  |
| 1  | 5.459307000  | 1.033656000  | 1.152072000  |
| 7  | 6.153577000  | 6.760344000  | 2.326492000  |
| 6  | 5.978054000  | 7.542063000  | 3.553506000  |
| 6  | 6.880674000  | 7.069452000  | 4.708103000  |
| 6  | 6.740544000  | 5.613308000  | 5.128094000  |
| 6  | 5.524785000  | 4.913671000  | 5.038323000  |
| 6  | 5.430343000  | 3.586516000  | 5.475479000  |
| 6  | 6.546428000  | 2.935694000  | 6.012654000  |
| 6  | 7.763169000  | 3.621017000  | 6.104771000  |
| 6  | 7.856441000  | 4.944309000  | 5.662353000  |

|   |              |              |              |
|---|--------------|--------------|--------------|
| 1 | 7.090136000  | 6.653264000  | 1.963215000  |
| 1 | 4.920295000  | 7.470562000  | 3.813369000  |
| 1 | 7.930999000  | 7.261782000  | 4.446422000  |
| 1 | 6.669237000  | 7.724530000  | 5.567590000  |
| 1 | 4.650124000  | 5.388822000  | 4.606753000  |
| 1 | 4.484347000  | 3.060469000  | 5.391298000  |
| 1 | 6.470460000  | 1.906973000  | 6.349555000  |
| 1 | 8.638201000  | 3.125736000  | 6.513971000  |
| 1 | 8.806507000  | 5.467954000  | 5.733414000  |
| 6 | 2.043669000  | 1.875506000  | -4.120458000 |
| 6 | 0.862674000  | 2.696155000  | -3.559075000 |
| 6 | -0.434155000 | 2.585996000  | -4.379151000 |
| 6 | 1.839858000  | 0.352224000  | -4.046587000 |
| 1 | 2.227159000  | 2.171484000  | -5.165920000 |
| 1 | 0.666280000  | 2.388648000  | -2.522309000 |
| 1 | 1.160998000  | 3.754732000  | -3.519085000 |
| 1 | -0.265584000 | 2.883902000  | -5.424266000 |
| 1 | -0.819093000 | 1.558033000  | -4.384957000 |
| 1 | -1.212031000 | 3.233532000  | -3.960416000 |
| 1 | 2.716208000  | -0.185729000 | -4.430181000 |
| 1 | 0.970659000  | 0.034833000  | -4.635700000 |
| 1 | 1.677333000  | 0.033834000  | -3.009478000 |
| 6 | -2.694238000 | 6.275764000  | -0.774214000 |
| 6 | -1.440708000 | 6.160631000  | 0.130685000  |
| 6 | -0.155883000 | 5.771802000  | -0.622441000 |
| 6 | 1.023647000  | 5.495827000  | 0.328225000  |
| 7 | 0.747607000  | 4.315778000  | 1.163344000  |
| 6 | 0.846148000  | 4.264824000  | 2.494824000  |
| 7 | 1.549525000  | 5.206958000  | 3.183066000  |
| 7 | 0.229018000  | 3.272119000  | 3.163977000  |
| 6 | -2.989849000 | 4.985219000  | -1.529078000 |
| 8 | -2.565714000 | 4.828293000  | -2.708242000 |
| 1 | -2.529165000 | 7.043976000  | -1.536091000 |
| 1 | -1.624348000 | 5.417994000  | 0.917221000  |
| 1 | -1.289860000 | 7.124074000  | 0.639757000  |
| 1 | -0.334810000 | 4.885340000  | -1.241488000 |
| 1 | 0.133339000  | 6.576637000  | -1.312101000 |
| 1 | 1.938810000  | 5.327729000  | -0.250684000 |
| 1 | 1.203473000  | 6.359381000  | 0.976148000  |
| 1 | 0.420853000  | 3.435449000  | 0.670303000  |
| 1 | 2.333019000  | 5.694772000  | 2.749449000  |
| 1 | 1.425229000  | 5.289287000  | 4.178573000  |
| 1 | -0.358072000 | 2.554996000  | 2.654350000  |
| 1 | 0.497299000  | 3.075263000  | 4.115641000  |
| 7 | -3.674382000 | 4.003255000  | -0.882209000 |
| 6 | -3.919731000 | 2.691522000  | -1.537105000 |
| 6 | -4.924477000 | 2.001935000  | -0.598830000 |
| 6 | -4.567954000 | 2.577449000  | 0.789737000  |
| 6 | -4.234695000 | 4.052910000  | 0.490277000  |
| 1 | -2.973633000 | 2.140035000  | -1.606975000 |



|   |              |              |              |
|---|--------------|--------------|--------------|
| 1 | -5.949505000 | 2.286478000  | -0.872330000 |
| 1 | -4.862005000 | 0.911918000  | -0.647190000 |
| 1 | -5.379544000 | 2.477628000  | 1.517041000  |
| 1 | -3.681487000 | 2.075355000  | 1.195477000  |
| 1 | -3.514746000 | 4.465429000  | 1.201678000  |
| 1 | -5.138993000 | 4.679410000  | 0.513692000  |
| 6 | -1.562611000 | -3.499132000 | -8.142972000 |
| 6 | -1.569448000 | -1.986226000 | -8.168553000 |
| 6 | -2.698062000 | -1.276104000 | -8.612534000 |
| 6 | -2.717169000 | 0.123916000  | -8.605169000 |
| 6 | -1.604096000 | 0.841300000  | -8.150164000 |
| 6 | -0.470056000 | 0.146637000  | -7.708668000 |
| 6 | -0.454362000 | -1.253022000 | -7.722179000 |
| 1 | -0.571467000 | -3.900016000 | -8.383490000 |
| 1 | -1.836579000 | -3.877490000 | -7.148699000 |
| 1 | -3.566738000 | -1.825002000 | -8.965177000 |
| 1 | -3.598314000 | 0.651709000  | -8.957491000 |
| 1 | -1.614409000 | 1.926608000  | -8.145443000 |
| 1 | 0.399793000  | 0.693905000  | -7.359520000 |
| 1 | 0.434367000  | -1.783949000 | -7.390546000 |
| 6 | -8.212923000 | -3.856446000 | -0.976244000 |
| 6 | -6.966651000 | -4.462714000 | -1.038688000 |
| 6 | -6.619606000 | -5.699990000 | -0.372759000 |
| 6 | -5.317284000 | -5.968545000 | -0.680566000 |
| 6 | -4.853846000 | -4.896253000 | -1.534476000 |
| 7 | -5.877902000 | -3.984037000 | -1.747669000 |
| 6 | -3.575001000 | -4.798359000 | -2.056147000 |
| 6 | -3.116982000 | -3.773470000 | -2.874172000 |
| 6 | -1.780545000 | -3.697541000 | -3.425502000 |
| 6 | -1.726674000 | -2.561732000 | -4.183354000 |
| 6 | -3.029508000 | -1.936523000 | -4.096768000 |
| 7 | -3.866360000 | -2.690814000 | -3.294107000 |
| 6 | -3.374745000 | -0.752886000 | -4.734057000 |
| 6 | -4.614806000 | -0.137997000 | -4.656406000 |
| 6 | -4.951344000 | 1.111577000  | -5.303619000 |
| 6 | -6.251706000 | 1.386257000  | -4.987766000 |
| 6 | -6.720685000 | 0.304602000  | -4.148240000 |
| 7 | -5.709401000 | -0.620420000 | -3.955036000 |
| 6 | -8.007040000 | 0.204014000  | -3.632223000 |
| 6 | -8.475640000 | -0.834861000 | -2.847141000 |
| 6 | -9.818681000 | -0.934287000 | -2.320107000 |
| 6 | -9.875366000 | -2.075336000 | -1.573105000 |
| 6 | -8.568616000 | -2.691920000 | -1.633137000 |
| 7 | -7.721966000 | -1.929865000 | -2.432149000 |
| 1 | -8.973747000 | -4.341998000 | -0.374370000 |
| 1 | -2.872295000 | -5.585829000 | -1.805107000 |
| 1 | -2.614376000 | -0.269307000 | -5.337524000 |
| 1 | -8.702133000 | 1.002730000  | -3.869007000 |
| 8 | -1.015464000 | 1.304265000  | 1.840670000  |
| 6 | -0.540556000 | 1.102173000  | 0.655272000  |

|   |               |              |              |
|---|---------------|--------------|--------------|
| 8 | 0.075431000   | 2.005341000  | -0.031975000 |
| 6 | -0.654365000  | -0.293803000 | 0.025631000  |
| 6 | -2.013631000  | -1.010608000 | 0.290448000  |
| 6 | -2.270363000  | -1.511111000 | 1.719636000  |
| 1 | -0.591505000  | -0.123007000 | -1.055344000 |
| 1 | -2.820341000  | -0.329071000 | -0.005641000 |
| 1 | -2.070100000  | -1.860909000 | -0.403351000 |
| 1 | -2.243343000  | -0.679396000 | 2.427228000  |
| 1 | -1.519436000  | -2.248953000 | 2.026394000  |
| 8 | -5.263442000  | -1.372227000 | -1.419165000 |
| 1 | -2.279250000  | -3.914841000 | -8.858669000 |
| 1 | 2.955399000   | 2.135436000  | -3.562490000 |
| 1 | -4.293321000  | 2.843817000  | -2.552623000 |
| 1 | -3.553398000  | 6.584696000  | -0.166091000 |
| 1 | 6.449117000   | 5.681018000  | 0.045669000  |
| 1 | 6.188983000   | 8.599891000  | 3.349224000  |
| 1 | -10.715154000 | -2.475466000 | -1.024096000 |
| 1 | -7.296249000  | -6.275431000 | 0.241790000  |
| 1 | -6.849218000  | 2.235071000  | -5.286487000 |
| 1 | -10.602811000 | -0.214377000 | -2.503878000 |
| 1 | -4.712875000  | -6.807210000 | -0.367502000 |
| 1 | -1.001457000  | -4.424037000 | -3.246989000 |
| 1 | -4.267950000  | 1.686995000  | -5.909617000 |
| 1 | -0.899352000  | -2.167720000 | -4.754426000 |
| 6 | 0.545025000   | -1.163561000 | 0.407694000  |
| 6 | 1.084227000   | -2.053624000 | -0.538391000 |
| 6 | 1.115558000   | -1.130863000 | 1.693365000  |
| 6 | 2.160639000   | -2.886907000 | -0.214082000 |
| 1 | 0.652426000   | -2.090997000 | -1.535075000 |
| 6 | 2.193789000   | -1.962327000 | 2.018798000  |
| 1 | 0.704773000   | -0.450501000 | 2.431490000  |
| 6 | 2.721433000   | -2.843851000 | 1.067548000  |
| 1 | 2.564346000   | -3.563400000 | -0.962160000 |
| 1 | 2.619521000   | -1.924478000 | 3.017701000  |
| 1 | 3.558717000   | -3.487224000 | 1.321133000  |
| 1 | -3.254985000  | -1.991980000 | 1.771586000  |

<sup>4</sup>TS1<sub>alpha,HA,S2</sub>

|    |              |              |              |
|----|--------------|--------------|--------------|
| 26 | -2.673564000 | -1.941888000 | -1.738259000 |
| 16 | -3.519387000 | -2.554278000 | -3.929065000 |
| 1  | -3.353053000 | -1.327755000 | -4.542928000 |
| 6  | 5.774509000  | 5.004610000  | 0.162459000  |
| 6  | 5.936667000  | 3.910510000  | -0.924493000 |
| 6  | 4.653428000  | 3.556165000  | -1.712834000 |
| 6  | 4.069751000  | 4.774487000  | -2.454932000 |
| 6  | 4.943871000  | 2.402914000  | -2.693645000 |
| 6  | 4.757872000  | 4.654259000  | 1.237202000  |
| 8  | 3.650890000  | 5.260916000  | 1.317882000  |
| 1  | 5.452637000  | 5.947335000  | -0.284486000 |

|   |              |              |              |
|---|--------------|--------------|--------------|
| 1 | 6.706677000  | 4.251062000  | -1.631901000 |
| 1 | 6.326196000  | 2.992052000  | -0.461982000 |
| 1 | 3.901492000  | 3.197930000  | -0.993666000 |
| 1 | 3.192266000  | 4.481503000  | -3.043535000 |
| 1 | 3.756950000  | 5.563462000  | -1.762733000 |
| 1 | 4.807664000  | 5.199139000  | -3.149314000 |
| 1 | 4.037623000  | 2.120603000  | -3.241784000 |
| 1 | 5.302852000  | 1.513261000  | -2.163711000 |
| 1 | 5.704741000  | 2.696830000  | -3.429227000 |
| 7 | 5.110496000  | 3.656233000  | 2.087392000  |
| 6 | 4.253492000  | 3.123959000  | 3.153677000  |
| 6 | 4.402608000  | 1.595133000  | 3.297594000  |
| 6 | 3.922702000  | 0.808392000  | 2.091363000  |
| 6 | 2.549240000  | 0.720430000  | 1.801370000  |
| 6 | 2.087970000  | -0.000982000 | 0.694598000  |
| 6 | 3.007497000  | -0.647064000 | -0.143502000 |
| 6 | 4.377481000  | -0.569491000 | 0.132488000  |
| 6 | 4.831279000  | 0.153775000  | 1.243891000  |
| 1 | 6.006424000  | 3.208557000  | 1.950473000  |
| 1 | 3.222264000  | 3.383535000  | 2.906190000  |
| 1 | 5.453911000  | 1.352735000  | 3.510259000  |
| 1 | 3.835896000  | 1.298380000  | 4.190273000  |
| 1 | 1.821860000  | 1.208784000  | 2.443345000  |
| 1 | 1.019111000  | -0.059136000 | 0.513446000  |
| 1 | 2.650614000  | -1.216004000 | -0.995554000 |
| 1 | 5.092283000  | -1.080979000 | -0.505816000 |
| 1 | 5.896035000  | 0.191291000  | 1.464856000  |
| 6 | -3.189135000 | 7.089654000  | -7.301548000 |
| 6 | -2.977676000 | 6.450837000  | -5.912115000 |
| 6 | -4.106237000 | 5.502959000  | -5.471425000 |
| 6 | -3.160104000 | 6.083656000  | -8.464720000 |
| 1 | -4.149767000 | 7.626520000  | -7.305787000 |
| 1 | -2.020976000 | 5.906005000  | -5.911346000 |
| 1 | -2.873528000 | 7.254409000  | -5.167782000 |
| 1 | -5.073010000 | 6.024201000  | -5.469589000 |
| 1 | -4.195592000 | 4.642515000  | -6.144866000 |
| 1 | -3.926607000 | 5.118575000  | -4.461408000 |
| 1 | -3.274600000 | 6.591563000  | -9.429823000 |
| 1 | -3.965850000 | 5.345626000  | -8.381602000 |
| 1 | -2.208501000 | 5.536725000  | -8.485260000 |
| 6 | -1.938677000 | 6.325862000  | -1.489485000 |
| 6 | -0.635577000 | 5.903119000  | -0.758485000 |
| 6 | -0.113301000 | 4.506960000  | -1.152619000 |
| 6 | 0.912193000  | 3.940059000  | -0.147782000 |
| 7 | 0.266330000  | 3.567934000  | 1.122512000  |
| 6 | 0.181824000  | 4.313629000  | 2.228046000  |
| 7 | 1.066397000  | 5.311697000  | 2.492644000  |
| 7 | -0.814338000 | 4.050295000  | 3.101531000  |
| 6 | -3.090131000 | 5.374804000  | -1.193660000 |
| 8 | -3.386950000 | 4.454545000  | -2.011695000 |

|   |              |              |              |
|---|--------------|--------------|--------------|
| 1 | -1.783550000 | 6.304187000  | -2.572188000 |
| 1 | -0.814346000 | 5.925103000  | 0.323042000  |
| 1 | 0.139775000  | 6.655518000  | -0.957971000 |
| 1 | -0.945674000 | 3.798754000  | -1.233915000 |
| 1 | 0.356848000  | 4.554816000  | -2.145319000 |
| 1 | 1.357816000  | 3.025474000  | -0.550912000 |
| 1 | 1.724998000  | 4.649558000  | 0.026402000  |
| 1 | -0.231695000 | 2.634602000  | 1.161605000  |
| 1 | 1.990150000  | 5.345754000  | 2.052948000  |
| 1 | 0.850803000  | 5.992490000  | 3.202496000  |
| 1 | -1.580326000 | 3.379986000  | 2.830487000  |
| 1 | -0.742332000 | 4.356972000  | 4.059270000  |
| 7 | -3.739825000 | 5.495225000  | -0.006289000 |
| 6 | -4.747448000 | 4.485252000  | 0.422584000  |
| 6 | -5.392673000 | 5.118956000  | 1.667338000  |
| 6 | -4.269074000 | 6.005136000  | 2.248743000  |
| 6 | -3.571168000 | 6.572787000  | 0.997808000  |
| 1 | -4.235297000 | 3.548222000  | 0.668248000  |
| 1 | -6.254859000 | 5.736129000  | 1.384244000  |
| 1 | -5.735480000 | 4.360321000  | 2.375531000  |
| 1 | -4.639909000 | 6.795192000  | 2.908904000  |
| 1 | -3.563284000 | 5.384771000  | 2.812348000  |
| 1 | -2.516231000 | 6.793030000  | 1.177356000  |
| 1 | -4.059842000 | 7.495676000  | 0.653178000  |
| 6 | -0.399130000 | -3.566003000 | -6.763951000 |
| 6 | 1.069623000  | -3.445303000 | -6.425653000 |
| 6 | 1.755354000  | -2.229742000 | -6.599310000 |
| 6 | 3.105478000  | -2.106151000 | -6.250063000 |
| 6 | 3.799451000  | -3.201340000 | -5.720859000 |
| 6 | 3.131513000  | -4.420468000 | -5.549428000 |
| 6 | 1.781594000  | -4.538866000 | -5.900270000 |
| 1 | -0.651547000 | -4.579283000 | -7.094804000 |
| 1 | -1.027866000 | -3.343634000 | -5.890519000 |
| 1 | 1.224251000  | -1.375500000 | -7.009787000 |
| 1 | 3.616803000  | -1.159428000 | -6.399641000 |
| 1 | 4.848302000  | -3.109473000 | -5.455700000 |
| 1 | 3.662871000  | -5.280152000 | -5.151235000 |
| 1 | 1.270401000  | -5.487881000 | -5.764585000 |
| 6 | -6.045752000 | -1.714338000 | -1.057910000 |
| 6 | -5.423579000 | -2.931239000 | -0.825984000 |
| 6 | -6.077431000 | -4.093640000 | -0.263889000 |
| 6 | -5.126043000 | -5.065193000 | -0.130256000 |
| 6 | -3.882425000 | -4.512109000 | -0.621993000 |
| 7 | -4.081660000 | -3.211479000 | -1.044089000 |
| 6 | -2.679525000 | -5.202073000 | -0.691344000 |
| 6 | -1.512998000 | -4.703938000 | -1.246002000 |
| 6 | -0.300325000 | -5.471965000 | -1.439191000 |
| 6 | 0.582567000  | -4.669931000 | -2.101986000 |
| 6 | -0.069842000 | -3.392813000 | -2.303213000 |
| 7 | -1.349502000 | -3.429632000 | -1.769285000 |

|   |              |              |              |
|---|--------------|--------------|--------------|
| 6 | 0.518547000  | -2.298815000 | -2.914696000 |
| 6 | -0.070451000 | -1.046774000 | -3.036961000 |
| 6 | 0.589758000  | 0.126011000  | -3.568999000 |
| 6 | -0.287267000 | 1.167728000  | -3.449230000 |
| 6 | -1.500326000 | 0.640196000  | -2.862479000 |
| 7 | -1.348194000 | -0.719154000 | -2.624221000 |
| 6 | -2.647873000 | 1.382691000  | -2.627219000 |
| 6 | -3.850579000 | 0.855216000  | -2.176293000 |
| 6 | -5.084196000 | 1.606845000  | -2.066703000 |
| 6 | -6.051220000 | 0.725944000  | -1.671173000 |
| 6 | -5.414417000 | -0.566301000 | -1.514527000 |
| 7 | -4.071558000 | -0.466493000 | -1.833063000 |
| 1 | -7.105958000 | -1.647011000 | -0.837403000 |
| 1 | -2.664890000 | -6.222511000 | -0.323844000 |
| 1 | 1.521945000  | -2.422362000 | -3.307197000 |
| 1 | -2.627088000 | 2.447351000  | -2.832652000 |
| 8 | -2.667154000 | 2.204932000  | 2.351246000  |
| 6 | -2.067155000 | 1.143562000  | 1.916161000  |
| 8 | -0.866824000 | 1.160811000  | 1.440672000  |
| 6 | -2.813859000 | -0.183833000 | 1.988172000  |
| 6 | -4.342709000 | -0.037835000 | 1.964068000  |
| 6 | -4.979829000 | 0.363366000  | 3.312091000  |
| 1 | -2.522542000 | -0.733485000 | 0.828883000  |
| 1 | -4.593589000 | 0.720212000  | 1.215208000  |
| 1 | -4.790854000 | -0.974437000 | 1.610104000  |
| 1 | -4.581056000 | 1.329123000  | 3.631594000  |
| 1 | -4.770038000 | -0.377266000 | 4.091718000  |
| 8 | -2.194436000 | -1.440222000 | -0.158760000 |
| 1 | -0.684977000 | -2.868607000 | -7.558743000 |
| 1 | -2.411357000 | 7.849590000  | -7.466646000 |
| 1 | -5.455529000 | 4.294561000  | -0.386659000 |
| 1 | -2.196056000 | 7.354941000  | -1.209954000 |
| 1 | 6.750290000  | 5.183997000  | 0.634806000  |
| 1 | 4.500518000  | 3.612600000  | 4.106700000  |
| 1 | -7.099205000 | 0.916316000  | -1.489209000 |
| 1 | -7.125751000 | -4.141687000 | -0.006847000 |
| 1 | -0.151777000 | 2.199063000  | -3.740971000 |
| 1 | -5.152853000 | 2.664774000  | -2.267789000 |
| 1 | -5.240981000 | -6.068322000 | 0.254141000  |
| 1 | -0.167223000 | -6.494614000 | -1.117009000 |
| 1 | 1.590909000  | 0.128803000  | -3.974666000 |
| 1 | 1.584104000  | -4.899748000 | -2.434340000 |
| 6 | -2.242422000 | -1.210396000 | 2.914433000  |
| 6 | -2.994875000 | -2.359315000 | 3.264218000  |
| 6 | -0.930098000 | -1.108902000 | 3.435548000  |
| 6 | -2.472647000 | -3.337659000 | 4.110871000  |
| 1 | -3.991439000 | -2.493319000 | 2.860703000  |
| 6 | -0.412625000 | -2.087918000 | 4.284689000  |
| 1 | -0.318890000 | -0.264242000 | 3.146712000  |
| 6 | -1.179226000 | -3.206989000 | 4.632917000  |

|   |              |              |             |
|---|--------------|--------------|-------------|
| 1 | -3.074824000 | -4.206290000 | 4.360410000 |
| 1 | 0.597603000  | -1.981383000 | 4.669174000 |
| 1 | -0.773247000 | -3.969282000 | 5.290908000 |
| 1 | -6.069610000 | 0.445636000  | 3.207962000 |

#### <sup>4</sup>IM1<sub>alpha,S2</sub>

|    |              |              |              |
|----|--------------|--------------|--------------|
| 26 | -1.717902000 | -1.389485000 | -1.738322000 |
| 16 | -2.850698000 | -2.460295000 | -3.540711000 |
| 1  | -2.978387000 | -1.353449000 | -4.357209000 |
| 6  | 5.366693000  | 3.882315000  | -0.133473000 |
| 6  | 5.487736000  | 2.576512000  | -0.956174000 |
| 6  | 4.197893000  | 2.125119000  | -1.682679000 |
| 6  | 3.711598000  | 3.163415000  | -2.712773000 |
| 6  | 4.421215000  | 0.753388000  | -2.348651000 |
| 6  | 4.285742000  | 3.860665000  | 0.935756000  |
| 8  | 3.389542000  | 4.756156000  | 0.974650000  |
| 1  | 5.140506000  | 4.730844000  | -0.782615000 |
| 1  | 6.285213000  | 2.719539000  | -1.699755000 |
| 1  | 5.829293000  | 1.756499000  | -0.306827000 |
| 1  | 3.408465000  | 1.997806000  | -0.925839000 |
| 1  | 2.806002000  | 2.805734000  | -3.216396000 |
| 1  | 3.473629000  | 4.126418000  | -2.247016000 |
| 1  | 4.477318000  | 3.337143000  | -3.481315000 |
| 1  | 3.503178000  | 0.403129000  | -2.832361000 |
| 1  | 4.715279000  | -0.002024000 | -1.610638000 |
| 1  | 5.208086000  | 0.813256000  | -3.113110000 |
| 7  | 4.336434000  | 2.856171000  | 1.842699000  |
| 6  | 3.327598000  | 2.667024000  | 2.895304000  |
| 6  | 3.487831000  | 1.289712000  | 3.565765000  |
| 6  | 3.374337000  | 0.138290000  | 2.580676000  |
| 6  | 2.182370000  | -0.072738000 | 1.862462000  |
| 6  | 2.083310000  | -1.098715000 | 0.916833000  |
| 6  | 3.184312000  | -1.937559000 | 0.683255000  |
| 6  | 4.372275000  | -1.744903000 | 1.396442000  |
| 6  | 4.466915000  | -0.710520000 | 2.338333000  |
| 1  | 5.012641000  | 2.115075000  | 1.715709000  |
| 1  | 2.333091000  | 2.745672000  | 2.445606000  |
| 1  | 4.454359000  | 1.243482000  | 4.085245000  |
| 1  | 2.713921000  | 1.209919000  | 4.340369000  |
| 1  | 1.321740000  | 0.570091000  | 2.029935000  |
| 1  | 1.152794000  | -1.223269000 | 0.368680000  |
| 1  | 3.108824000  | -2.732323000 | -0.051743000 |
| 1  | 5.224348000  | -2.396392000 | 1.224890000  |
| 1  | 5.389140000  | -0.572384000 | 2.898994000  |
| 6  | -2.319948000 | 6.725898000  | -7.299809000 |
| 6  | -2.584869000 | 6.236299000  | -5.860001000 |
| 6  | -3.941847000 | 5.538689000  | -5.664081000 |
| 6  | -2.181587000 | 5.592927000  | -8.330956000 |
| 1  | -3.135178000 | 7.399847000  | -7.603279000 |

|   |              |              |              |
|---|--------------|--------------|--------------|
| 1 | -1.774542000 | 5.552396000  | -5.561341000 |
| 1 | -2.524525000 | 7.097872000  | -5.178419000 |
| 1 | -4.765755000 | 6.204692000  | -5.953428000 |
| 1 | -4.020477000 | 4.631097000  | -6.274076000 |
| 1 | -4.087625000 | 5.251673000  | -4.616858000 |
| 1 | -1.957256000 | 5.990577000  | -9.327913000 |
| 1 | -3.101376000 | 5.002565000  | -8.409325000 |
| 1 | -1.369235000 | 4.908560000  | -8.053370000 |
| 6 | -2.350657000 | 6.358917000  | -1.474507000 |
| 6 | -1.082858000 | 5.796717000  | -0.775950000 |
| 6 | -0.719619000 | 4.358305000  | -1.187637000 |
| 6 | 0.335050000  | 3.701753000  | -0.271364000 |
| 7 | -0.200233000 | 3.473465000  | 1.086545000  |
| 6 | -0.101505000 | 4.322652000  | 2.120337000  |
| 7 | 0.918233000  | 5.212360000  | 2.214399000  |
| 7 | -1.043638000 | 4.277073000  | 3.083139000  |
| 6 | -3.592001000 | 5.512116000  | -1.227107000 |
| 8 | -3.985471000 | 4.677758000  | -2.095690000 |
| 1 | -2.199877000 | 6.375181000  | -2.557921000 |
| 1 | -1.233292000 | 5.831755000  | 0.308617000  |
| 1 | -0.241043000 | 6.468950000  | -0.991846000 |
| 1 | -1.614628000 | 3.726962000  | -1.184646000 |
| 1 | -0.338291000 | 4.347312000  | -2.217834000 |
| 1 | 0.606436000  | 2.720797000  | -0.672269000 |
| 1 | 1.247574000  | 4.300934000  | -0.221323000 |
| 1 | -0.852348000 | 2.659954000  | 1.203715000  |
| 1 | 1.808059000  | 5.078085000  | 1.718930000  |
| 1 | 0.849831000  | 5.976467000  | 2.866763000  |
| 1 | -1.914956000 | 3.705172000  | 2.930881000  |
| 1 | -0.860324000 | 4.674712000  | 3.991146000  |
| 7 | -4.241093000 | 5.639069000  | -0.039148000 |
| 6 | -5.397572000 | 4.763402000  | 0.290286000  |
| 6 | -5.983727000 | 5.397549000  | 1.563007000  |
| 6 | -4.749937000 | 6.027870000  | 2.244053000  |
| 6 | -3.931848000 | 6.583725000  | 1.061744000  |
| 1 | -5.035875000 | 3.746170000  | 0.476548000  |
| 1 | -6.718059000 | 6.171154000  | 1.304633000  |
| 1 | -6.478895000 | 4.657994000  | 2.197821000  |
| 1 | -5.006372000 | 6.804810000  | 2.970653000  |
| 1 | -4.178724000 | 5.243239000  | 2.751779000  |
| 1 | -2.862185000 | 6.607960000  | 1.280464000  |
| 1 | -4.253173000 | 7.601052000  | 0.795207000  |
| 6 | -0.320138000 | -3.250729000 | -7.032676000 |
| 6 | 1.102768000  | -2.757703000 | -7.170198000 |
| 6 | 1.377799000  | -1.464032000 | -7.648283000 |
| 6 | 2.692733000  | -0.991095000 | -7.735673000 |
| 6 | 3.762304000  | -1.807737000 | -7.348159000 |
| 6 | 3.504128000  | -3.101628000 | -6.878423000 |
| 6 | 2.187653000  | -3.569838000 | -6.793048000 |
| 1 | -0.384992000 | -4.334081000 | -7.181015000 |

|   |              |              |              |
|---|--------------|--------------|--------------|
| 1 | -0.719518000 | -3.035846000 | -6.031877000 |
| 1 | 0.553344000  | -0.825008000 | -7.952163000 |
| 1 | 2.882059000  | 0.009404000  | -8.114030000 |
| 1 | 4.782929000  | -1.444709000 | -7.420332000 |
| 1 | 4.326974000  | -3.748468000 | -6.587682000 |
| 1 | 1.994679000  | -4.575170000 | -6.428860000 |
| 6 | -4.710182000 | -1.741345000 | -0.096754000 |
| 6 | -3.802738000 | -2.783099000 | -0.007333000 |
| 6 | -4.013439000 | -3.990570000 | 0.760827000  |
| 6 | -2.877906000 | -4.740063000 | 0.653380000  |
| 6 | -1.960915000 | -4.008436000 | -0.193743000 |
| 7 | -2.545683000 | -2.818033000 | -0.590723000 |
| 6 | -0.707347000 | -4.461511000 | -0.570153000 |
| 6 | 0.133457000  | -3.803679000 | -1.453819000 |
| 6 | 1.381237000  | -4.340203000 | -1.952974000 |
| 6 | 1.863440000  | -3.450331000 | -2.872598000 |
| 6 | 0.924678000  | -2.351639000 | -2.935303000 |
| 7 | -0.119916000 | -2.580431000 | -2.052310000 |
| 6 | 1.067511000  | -1.246631000 | -3.757319000 |
| 6 | 0.187978000  | -0.174513000 | -3.797882000 |
| 6 | 0.387049000  | 1.017728000  | -4.592573000 |
| 6 | -0.651172000 | 1.865128000  | -4.315744000 |
| 6 | -1.507264000 | 1.194589000  | -3.362497000 |
| 7 | -0.980808000 | -0.054233000 | -3.065517000 |
| 6 | -2.686934000 | 1.718455000  | -2.854103000 |
| 6 | -3.542379000 | 1.037465000  | -2.002826000 |
| 6 | -4.833366000 | 1.536058000  | -1.583008000 |
| 6 | -5.418006000 | 0.551921000  | -0.835817000 |
| 6 | -4.486541000 | -0.553586000 | -0.774434000 |
| 7 | -3.342355000 | -0.234157000 | -1.487461000 |
| 1 | -5.656742000 | -1.854474000 | 0.419626000  |
| 1 | -0.381045000 | -5.419958000 | -0.181926000 |
| 1 | 1.931325000  | -1.213454000 | -4.411224000 |
| 1 | -2.979356000 | 2.720768000  | -3.146085000 |
| 8 | -3.158625000 | 2.688083000  | 2.673229000  |
| 6 | -2.801792000 | 1.484640000  | 2.342386000  |
| 8 | -1.787172000 | 1.260468000  | 1.553394000  |
| 6 | -3.596137000 | 0.377228000  | 2.934584000  |
| 6 | -5.028148000 | 0.730416000  | 3.278566000  |
| 6 | -5.207586000 | 1.253925000  | 4.725520000  |
| 1 | -1.403263000 | 0.011045000  | 0.285059000  |
| 1 | -5.364932000 | 1.511675000  | 2.591024000  |
| 1 | -5.679896000 | -0.138639000 | 3.120891000  |
| 1 | -4.611599000 | 2.161282000  | 4.854941000  |
| 1 | -4.880169000 | 0.512482000  | 5.463006000  |
| 8 | -0.913233000 | -0.581107000 | -0.355340000 |
| 1 | -0.982776000 | -2.768703000 | -7.759481000 |
| 1 | -1.401481000 | 7.330783000  | -7.307837000 |
| 1 | -6.094274000 | 4.735855000  | -0.551307000 |
| 1 | -2.514498000 | 7.392860000  | -1.145237000 |



|   |              |              |              |
|---|--------------|--------------|--------------|
| 1 | 6.331707000  | 4.094304000  | 0.348701000  |
| 1 | 3.417203000  | 3.468754000  | 3.639061000  |
| 1 | -6.388697000 | 0.555935000  | -0.361445000 |
| 1 | -4.911494000 | -4.209506000 | 1.318955000  |
| 1 | -0.845808000 | 2.846926000  | -4.723029000 |
| 1 | -5.197283000 | 2.518519000  | -1.841463000 |
| 1 | -2.662084000 | -5.699518000 | 1.100109000  |
| 1 | 1.805160000  | -5.286080000 | -1.647469000 |
| 1 | 1.214995000  | 1.163569000  | -5.271017000 |
| 1 | 2.759500000  | -3.518237000 | -3.471761000 |
| 6 | -3.023156000 | -0.884687000 | 3.336706000  |
| 6 | -3.808177000 | -1.853870000 | 4.035508000  |
| 6 | -1.649071000 | -1.212565000 | 3.123285000  |
| 6 | -3.257934000 | -3.049676000 | 4.488319000  |
| 1 | -4.855481000 | -1.658177000 | 4.230421000  |
| 6 | -1.110341000 | -2.412617000 | 3.577309000  |
| 1 | -1.028066000 | -0.511806000 | 2.585184000  |
| 6 | -1.904270000 | -3.341799000 | 4.265846000  |
| 1 | -3.885753000 | -3.759274000 | 5.019701000  |
| 1 | -0.062470000 | -2.624941000 | 3.388304000  |
| 1 | -1.478190000 | -4.275335000 | 4.620082000  |
| 1 | -6.260031000 | 1.493106000  | 4.923421000  |

<sup>4</sup>PrOH, alpha, S2

|    |              |              |              |
|----|--------------|--------------|--------------|
| 26 | -2.917056000 | -1.678054000 | -1.845623000 |
| 16 | -3.458550000 | -2.520612000 | -4.136865000 |
| 1  | -4.228826000 | -1.444554000 | -4.536453000 |
| 6  | 5.268482000  | 4.516208000  | -0.979369000 |
| 6  | 5.684505000  | 3.233775000  | -1.726853000 |
| 6  | 4.535959000  | 2.450928000  | -2.413142000 |
| 6  | 3.911838000  | 3.252528000  | -3.572398000 |
| 6  | 5.050068000  | 1.084104000  | -2.907553000 |
| 6  | 4.356754000  | 4.360691000  | 0.230848000  |
| 8  | 3.604920000  | 5.319714000  | 0.580319000  |
| 1  | 4.761669000  | 5.214516000  | -1.651664000 |
| 1  | 6.419672000  | 3.513624000  | -2.494830000 |
| 1  | 6.226718000  | 2.560321000  | -1.044864000 |
| 1  | 3.749113000  | 2.261299000  | -1.666646000 |
| 1  | 3.098018000  | 2.686239000  | -4.039619000 |
| 1  | 3.496182000  | 4.210049000  | -3.238514000 |
| 1  | 4.661842000  | 3.460911000  | -4.347103000 |
| 1  | 4.254023000  | 0.517051000  | -3.402846000 |
| 1  | 5.421711000  | 0.475354000  | -2.074578000 |
| 1  | 5.869284000  | 1.213202000  | -3.627950000 |
| 7  | 4.425523000  | 3.210161000  | 0.940357000  |
| 6  | 3.629427000  | 2.970620000  | 2.153031000  |
| 6  | 3.996816000  | 1.623309000  | 2.798831000  |
| 6  | 3.684729000  | 0.421938000  | 1.921399000  |
| 6  | 2.354236000  | 0.113617000  | 1.581049000  |

|   |              |              |              |
|---|--------------|--------------|--------------|
| 6 | 2.060715000  | -0.996484000 | 0.784658000  |
| 6 | 3.095158000  | -1.814411000 | 0.310085000  |
| 6 | 4.422301000  | -1.514719000 | 0.634780000  |
| 6 | 4.714160000  | -0.402678000 | 1.437062000  |
| 1 | 4.963893000  | 2.433803000  | 0.581543000  |
| 1 | 2.565636000  | 2.977563000  | 1.893536000  |
| 1 | 5.061341000  | 1.626043000  | 3.067373000  |
| 1 | 3.437636000  | 1.551278000  | 3.740857000  |
| 1 | 1.535420000  | 0.733812000  | 1.933682000  |
| 1 | 1.026736000  | -1.223374000 | 0.548353000  |
| 1 | 2.860803000  | -2.680034000 | -0.300422000 |
| 1 | 5.228492000  | -2.148254000 | 0.277039000  |
| 1 | 5.745574000  | -0.189617000 | 1.709772000  |
| 6 | -1.335705000 | 6.539702000  | -6.767357000 |
| 6 | -1.850345000 | 6.125668000  | -5.372142000 |
| 6 | -3.295106000 | 5.597659000  | -5.357420000 |
| 6 | -1.210873000 | 5.372718000  | -7.761674000 |
| 1 | -2.009183000 | 7.304333000  | -7.182877000 |
| 1 | -1.176288000 | 5.359595000  | -4.956442000 |
| 1 | -1.779114000 | 6.993923000  | -4.699698000 |
| 1 | -3.984971000 | 6.344420000  | -5.772791000 |
| 1 | -3.395760000 | 4.685243000  | -5.956591000 |
| 1 | -3.620748000 | 5.364896000  | -4.337321000 |
| 1 | -0.805234000 | 5.713322000  | -8.721762000 |
| 1 | -2.181322000 | 4.904238000  | -7.959895000 |
| 1 | -0.540301000 | 4.595731000  | -7.371938000 |
| 6 | -2.847724000 | 6.633892000  | -0.987357000 |
| 6 | -1.435512000 | 6.251778000  | -0.470753000 |
| 6 | -0.810096000 | 5.032632000  | -1.170686000 |
| 6 | 0.487695000  | 4.551105000  | -0.488553000 |
| 7 | 0.211573000  | 4.007815000  | 0.854179000  |
| 6 | 0.394330000  | 4.637429000  | 2.020648000  |
| 7 | 1.287967000  | 5.653593000  | 2.138800000  |
| 7 | -0.315471000 | 4.233258000  | 3.095634000  |
| 6 | -3.864498000 | 5.505627000  | -0.871279000 |
| 8 | -4.141551000 | 4.782719000  | -1.873473000 |
| 1 | -2.793110000 | 6.887789000  | -2.050020000 |
| 1 | -1.485215000 | 6.054025000  | 0.606807000  |
| 1 | -0.777139000 | 7.122888000  | -0.594534000 |
| 1 | -1.522669000 | 4.199654000  | -1.191440000 |
| 1 | -0.584933000 | 5.278677000  | -2.217899000 |
| 1 | 0.933929000  | 3.744522000  | -1.079350000 |
| 1 | 1.222917000  | 5.356339000  | -0.425979000 |
| 1 | -0.267176000 | 3.070143000  | 0.892057000  |
| 1 | 2.121255000  | 5.674330000  | 1.539621000  |
| 1 | 1.260779000  | 6.252689000  | 2.947784000  |
| 1 | -1.065283000 | 3.506403000  | 3.005576000  |
| 1 | -0.010275000 | 4.491189000  | 4.021326000  |
| 7 | -4.441385000 | 5.271021000  | 0.337932000  |
| 6 | -5.391515000 | 4.140643000  | 0.514384000  |

|   |              |              |              |
|---|--------------|--------------|--------------|
| 6 | -5.871181000 | 4.279930000  | 1.971747000  |
| 6 | -4.707370000 | 5.015460000  | 2.672746000  |
| 6 | -4.228307000 | 6.014143000  | 1.602965000  |
| 1 | -4.868554000 | 3.195121000  | 0.337264000  |
| 1 | -6.786609000 | 4.883228000  | 2.018459000  |
| 1 | -6.084596000 | 3.308545000  | 2.425178000  |
| 1 | -5.009035000 | 5.512437000  | 3.599601000  |
| 1 | -3.905392000 | 4.304106000  | 2.901949000  |
| 1 | -3.180640000 | 6.291075000  | 1.732451000  |
| 1 | -4.832429000 | 6.933379000  | 1.615775000  |
| 6 | -0.230038000 | -2.753584000 | -6.791187000 |
| 6 | 1.197889000  | -2.542353000 | -6.343020000 |
| 6 | 1.820289000  | -1.287468000 | -6.469309000 |
| 6 | 3.131290000  | -1.081891000 | -6.021873000 |
| 6 | 3.849951000  | -2.133119000 | -5.438389000 |
| 6 | 3.245690000  | -3.390911000 | -5.312677000 |
| 6 | 1.935608000  | -3.590979000 | -5.762621000 |
| 1 | -0.385090000 | -3.771540000 | -7.165198000 |
| 1 | -0.937160000 | -2.602666000 | -5.963489000 |
| 1 | 1.270556000  | -0.467916000 | -6.923756000 |
| 1 | 3.595426000  | -0.106764000 | -6.140693000 |
| 1 | 4.869645000  | -1.978249000 | -5.099045000 |
| 1 | 3.798378000  | -4.217925000 | -4.875752000 |
| 1 | 1.474670000  | -4.569790000 | -5.663704000 |
| 6 | -6.223355000 | -1.722976000 | -0.931775000 |
| 6 | -5.467251000 | -2.847971000 | -0.645789000 |
| 6 | -5.986634000 | -4.056074000 | -0.043574000 |
| 6 | -4.940104000 | -4.924563000 | 0.083480000  |
| 6 | -3.770264000 | -4.263439000 | -0.451884000 |
| 7 | -4.105109000 | -2.986109000 | -0.880753000 |
| 6 | -2.520627000 | -4.849677000 | -0.567345000 |
| 6 | -1.418659000 | -4.250419000 | -1.160215000 |
| 6 | -0.141732000 | -4.894958000 | -1.357427000 |
| 6 | 0.664586000  | -4.002466000 | -2.009725000 |
| 6 | -0.103119000 | -2.793840000 | -2.199030000 |
| 7 | -1.382081000 | -2.962796000 | -1.679816000 |
| 6 | 0.391586000  | -1.631719000 | -2.770628000 |
| 6 | -0.316775000 | -0.445586000 | -2.879146000 |
| 6 | 0.216206000  | 0.781469000  | -3.423448000 |
| 6 | -0.774559000 | 1.721398000  | -3.345492000 |
| 6 | -1.931918000 | 1.074141000  | -2.770826000 |
| 7 | -1.633223000 | -0.250987000 | -2.477290000 |
| 6 | -3.169112000 | 1.677197000  | -2.605479000 |
| 6 | -4.309419000 | 1.016583000  | -2.175445000 |
| 6 | -5.610971000 | 1.634408000  | -2.074047000 |
| 6 | -6.479575000 | 0.669855000  | -1.640075000 |
| 6 | -5.715625000 | -0.542080000 | -1.452678000 |
| 7 | -4.388661000 | -0.320479000 | -1.800890000 |
| 1 | -7.282636000 | -1.756356000 | -0.701248000 |
| 1 | -2.404337000 | -5.863722000 | -0.200646000 |

|   |              |              |              |
|---|--------------|--------------|--------------|
| 1 | 1.408084000  | -1.648462000 | -3.146377000 |
| 1 | -3.267594000 | 2.731714000  | -2.837286000 |
| 8 | -2.129889000 | 2.186283000  | 2.849852000  |
| 6 | -1.781484000 | 1.344499000  | 1.946517000  |
| 8 | -0.887947000 | 1.576247000  | 1.037833000  |
| 6 | -2.412100000 | -0.071482000 | 1.901716000  |
| 6 | -3.964501000 | -0.034307000 | 1.922939000  |
| 6 | -4.639355000 | 0.343161000  | 3.248577000  |
| 1 | -1.358323000 | -0.042819000 | 0.222059000  |
| 1 | -4.280223000 | 0.653442000  | 1.128707000  |
| 1 | -4.285531000 | -1.034991000 | 1.611151000  |
| 1 | -4.330066000 | 1.338398000  | 3.579125000  |
| 1 | -4.391530000 | -0.370019000 | 4.041660000  |
| 8 | -2.051428000 | -0.640862000 | 0.597862000  |
| 1 | -0.506187000 | -2.053874000 | -7.587331000 |
| 1 | -0.353585000 | 7.022337000  | -6.656727000 |
| 1 | -6.199840000 | 4.211677000  | -0.218620000 |
| 1 | -3.197383000 | 7.524783000  | -0.450705000 |
| 1 | 6.170180000  | 5.039549000  | -0.627926000 |
| 1 | 3.805643000  | 3.793700000  | 2.854846000  |
| 1 | -7.538950000 | 0.759881000  | -1.447065000 |
| 1 | -7.018647000 | -4.204421000 | 0.239427000  |
| 1 | -0.752126000 | 2.751786000  | -3.669967000 |
| 1 | -5.794227000 | 2.674504000  | -2.298433000 |
| 1 | -4.945852000 | -5.926407000 | 0.487772000  |
| 1 | 0.090017000  | -5.902778000 | -1.044501000 |
| 1 | 1.215049000  | 0.884804000  | -3.821401000 |
| 1 | 1.682312000  | -4.135946000 | -2.346143000 |
| 6 | -1.831547000 | -0.964563000 | 3.011899000  |
| 6 | -1.572795000 | -2.317043000 | 2.731891000  |
| 6 | -1.584578000 | -0.481095000 | 4.309061000  |
| 6 | -1.081011000 | -3.167503000 | 3.727665000  |
| 1 | -1.749774000 | -2.683501000 | 1.728357000  |
| 6 | -1.089741000 | -1.334700000 | 5.302367000  |
| 1 | -1.777330000 | 0.562187000  | 4.531161000  |
| 6 | -0.836661000 | -2.680971000 | 5.017115000  |
| 1 | -0.884485000 | -4.209660000 | 3.493121000  |
| 1 | -0.901967000 | -0.945428000 | 6.299142000  |
| 1 | -0.452336000 | -3.341587000 | 5.788677000  |
| 1 | -5.729403000 | 0.335141000  | 3.122927000  |

<sup>4</sup>Pr<sub>DS,alpha,S2</sub>

|    |              |              |              |
|----|--------------|--------------|--------------|
| 26 | -2.409549000 | -1.700266000 | -1.312657000 |
| 16 | -2.276809000 | -2.998277000 | -3.480116000 |
| 1  | -3.496260000 | -2.623811000 | -4.012568000 |
| 6  | 4.619721000  | 4.028420000  | -1.826593000 |
| 6  | 5.380441000  | 3.146222000  | -2.834438000 |
| 6  | 4.523372000  | 2.159206000  | -3.670176000 |
| 6  | 3.569948000  | 2.893024000  | -4.634410000 |

|   |              |              |              |
|---|--------------|--------------|--------------|
| 6 | 5.438840000  | 1.190750000  | -4.445123000 |
| 6 | 3.992461000  | 3.366058000  | -0.604562000 |
| 8 | 3.184136000  | 4.029243000  | 0.106828000  |
| 1 | 3.811309000  | 4.577425000  | -2.321013000 |
| 1 | 5.906295000  | 3.812645000  | -3.532827000 |
| 1 | 6.176487000  | 2.589580000  | -2.315242000 |
| 1 | 3.906049000  | 1.560202000  | -2.981520000 |
| 1 | 2.987531000  | 2.173076000  | -5.220294000 |
| 1 | 2.863854000  | 3.543590000  | -4.104482000 |
| 1 | 4.137143000  | 3.516379000  | -5.338676000 |
| 1 | 4.848586000  | 0.476248000  | -5.028411000 |
| 1 | 6.085973000  | 0.622024000  | -3.765249000 |
| 1 | 6.084912000  | 1.743742000  | -5.140418000 |
| 7 | 4.364240000  | 2.097954000  | -0.300825000 |
| 6 | 3.876238000  | 1.341348000  | 0.857860000  |
| 6 | 5.037291000  | 0.654652000  | 1.615162000  |
| 6 | 5.827493000  | -0.308984000 | 0.747896000  |
| 6 | 5.346274000  | -1.607615000 | 0.497513000  |
| 6 | 6.048184000  | -2.482139000 | -0.338680000 |
| 6 | 7.244707000  | -2.072616000 | -0.941487000 |
| 6 | 7.737613000  | -0.786509000 | -0.696727000 |
| 6 | 7.033916000  | 0.087165000  | 0.143022000  |
| 1 | 4.998981000  | 1.613041000  | -0.919905000 |
| 1 | 3.149255000  | 0.588365000  | 0.526292000  |
| 1 | 5.702268000  | 1.428299000  | 2.017320000  |
| 1 | 4.604882000  | 0.121323000  | 2.470931000  |
| 1 | 4.419419000  | -1.933521000 | 0.961864000  |
| 1 | 5.665257000  | -3.481975000 | -0.517096000 |
| 1 | 7.788967000  | -2.751990000 | -1.589233000 |
| 1 | 8.670438000  | -0.465459000 | -1.149642000 |
| 1 | 7.432248000  | 1.077944000  | 0.346151000  |
| 6 | -0.113183000 | 7.204907000  | -5.667479000 |
| 6 | -1.079521000 | 6.620531000  | -4.614563000 |
| 6 | -2.214913000 | 5.761993000  | -5.197769000 |
| 6 | 0.699573000  | 6.144532000  | -6.429891000 |
| 1 | -0.688858000 | 7.808915000  | -6.384690000 |
| 1 | -0.501501000 | 6.021766000  | -3.893141000 |
| 1 | -1.517634000 | 7.451060000  | -4.041411000 |
| 1 | -2.810363000 | 6.339607000  | -5.917318000 |
| 1 | -1.824393000 | 4.883045000  | -5.724806000 |
| 1 | -2.886014000 | 5.408005000  | -4.407022000 |
| 1 | 1.401822000  | 6.612319000  | -7.130156000 |
| 1 | 0.050956000  | 5.477127000  | -7.008053000 |
| 1 | 1.282102000  | 5.523458000  | -5.736326000 |
| 6 | -3.191486000 | 6.050735000  | -0.744755000 |
| 6 | -2.133369000 | 5.372389000  | 0.167023000  |
| 6 | -1.444849000 | 4.167996000  | -0.498523000 |
| 6 | -0.138145000 | 3.739450000  | 0.186261000  |
| 7 | -0.364053000 | 3.330064000  | 1.583263000  |
| 6 | 0.411502000  | 3.669166000  | 2.619781000  |

|   |              |              |              |
|---|--------------|--------------|--------------|
| 7 | 1.638119000  | 4.222755000  | 2.433153000  |
| 7 | -0.038811000 | 3.463662000  | 3.872277000  |
| 6 | -4.265160000 | 5.102182000  | -1.257489000 |
| 8 | -4.128096000 | 4.496968000  | -2.359906000 |
| 1 | -2.689430000 | 6.447504000  | -1.632981000 |
| 1 | -2.589496000 | 5.058574000  | 1.114663000  |
| 1 | -1.381820000 | 6.133704000  | 0.421546000  |
| 1 | -2.133764000 | 3.317209000  | -0.543885000 |
| 1 | -1.202085000 | 4.411386000  | -1.539982000 |
| 1 | 0.309702000  | 2.910588000  | -0.375235000 |
| 1 | 0.578460000  | 4.565874000  | 0.170529000  |
| 1 | -1.187963000 | 2.713174000  | 1.776057000  |
| 1 | 2.148457000  | 4.161547000  | 1.547075000  |
| 1 | 2.095207000  | 4.679016000  | 3.205761000  |
| 1 | -1.017882000 | 3.122025000  | 4.041818000  |
| 1 | 0.600250000  | 3.511106000  | 4.649599000  |
| 7 | -5.375693000 | 4.914456000  | -0.491404000 |
| 6 | -6.473036000 | 4.028991000  | -0.952772000 |
| 6 | -7.628438000 | 4.350938000  | 0.012508000  |
| 6 | -6.912092000 | 4.781650000  | 1.312801000  |
| 6 | -5.678245000 | 5.557328000  | 0.810816000  |
| 1 | -6.159015000 | 2.980379000  | -0.885494000 |
| 1 | -8.232094000 | 5.178860000  | -0.379505000 |
| 1 | -8.292664000 | 3.494832000  | 0.161240000  |
| 1 | -7.542097000 | 5.389945000  | 1.968159000  |
| 1 | -6.590761000 | 3.898992000  | 1.876927000  |
| 1 | -4.832224000 | 5.478593000  | 1.498622000  |
| 1 | -5.909883000 | 6.622855000  | 0.670236000  |
| 6 | -0.429048000 | -0.160715000 | -6.935653000 |
| 6 | 0.893776000  | -0.834531000 | -6.641851000 |
| 6 | 2.054599000  | -0.500328000 | -7.359882000 |
| 6 | 3.278857000  | -1.123324000 | -7.082029000 |
| 6 | 3.359230000  | -2.092165000 | -6.074611000 |
| 6 | 2.207691000  | -2.431942000 | -5.351266000 |
| 6 | 0.985657000  | -1.811795000 | -5.631993000 |
| 1 | -0.399641000 | 0.382858000  | -7.886194000 |
| 1 | -1.243220000 | -0.892330000 | -6.983422000 |
| 1 | 1.996032000  | 0.243076000  | -8.151075000 |
| 1 | 4.161348000  | -0.861374000 | -7.659237000 |
| 1 | 4.304008000  | -2.585162000 | -5.864263000 |
| 1 | 2.255138000  | -3.187683000 | -4.572748000 |
| 1 | 0.095735000  | -2.092141000 | -5.073149000 |
| 6 | -5.507825000 | -3.042082000 | -0.635722000 |
| 6 | -4.402761000 | -3.716904000 | -0.139977000 |
| 6 | -4.453675000 | -4.972431000 | 0.578412000  |
| 6 | -3.165991000 | -5.318906000 | 0.877509000  |
| 6 | -2.308418000 | -4.285423000 | 0.337321000  |
| 7 | -3.083031000 | -3.301840000 | -0.261779000 |
| 6 | -0.922225000 | -4.311812000 | 0.367777000  |
| 6 | -0.092463000 | -3.375893000 | -0.236280000 |

|   |              |              |              |
|---|--------------|--------------|--------------|
| 6 | 1.351915000  | -3.447322000 | -0.252314000 |
| 6 | 1.802077000  | -2.367269000 | -0.962561000 |
| 6 | 0.637553000  | -1.615036000 | -1.375494000 |
| 7 | -0.509803000 | -2.251462000 | -0.930370000 |
| 6 | 0.677426000  | -0.421830000 | -2.083632000 |
| 6 | -0.432347000 | 0.332536000  | -2.434064000 |
| 6 | -0.382991000 | 1.591095000  | -3.149939000 |
| 6 | -1.671999000 | 2.026534000  | -3.291471000 |
| 6 | -2.525062000 | 1.027643000  | -2.683153000 |
| 7 | -1.749934000 | 0.006383000  | -2.154377000 |
| 6 | -3.911264000 | 1.073190000  | -2.697602000 |
| 6 | -4.738642000 | 0.058193000  | -2.235218000 |
| 6 | -6.182078000 | 0.074236000  | -2.310511000 |
| 6 | -6.629666000 | -1.094161000 | -1.755071000 |
| 6 | -5.465927000 | -1.832965000 | -1.319991000 |
| 7 | -4.316953000 | -1.122379000 | -1.638219000 |
| 1 | -6.483203000 | -3.484877000 | -0.464239000 |
| 1 | -0.449003000 | -5.148330000 | 0.870816000  |
| 1 | 1.650724000  | -0.053279000 | -2.389587000 |
| 1 | -4.372263000 | 1.967344000  | -3.101764000 |
| 8 | -2.481166000 | 2.419912000  | 4.245247000  |
| 6 | -2.942104000 | 1.651551000  | 3.333604000  |
| 8 | -2.476705000 | 1.631829000  | 2.111906000  |
| 6 | -4.069458000 | 0.718809000  | 3.703802000  |
| 6 | -5.090860000 | 0.447777000  | 2.856878000  |
| 6 | -5.334651000 | 0.996492000  | 1.480716000  |
| 1 | -2.491811000 | 0.231624000  | 1.162352000  |
| 1 | -2.869477000 | -1.331013000 | 1.375941000  |
| 1 | -5.849091000 | -0.252691000 | 3.207584000  |
| 1 | -4.701120000 | 1.856599000  | 1.258847000  |
| 1 | -6.391038000 | 1.274917000  | 1.368381000  |
| 8 | -2.503783000 | -0.683635000 | 0.748988000  |
| 1 | -0.693933000 | 0.555061000  | -6.146480000 |
| 1 | 0.580181000  | 7.897609000  | -5.168604000 |
| 1 | -6.701744000 | 4.240694000  | -2.000858000 |
| 1 | -3.641005000 | 6.897246000  | -0.212220000 |
| 1 | 5.296345000  | 4.800826000  | -1.433190000 |
| 1 | 3.355823000  | 2.041498000  | 1.513738000  |
| 1 | -7.649396000 | -1.431831000 | -1.637697000 |
| 1 | -5.361901000 | -5.509847000 | 0.810184000  |
| 1 | -2.038021000 | 2.932289000  | -3.751006000 |
| 1 | -6.762485000 | 0.875300000  | -2.744956000 |
| 1 | -2.813810000 | -6.196822000 | 1.399625000  |
| 1 | 1.930174000  | -4.234566000 | 0.210227000  |
| 1 | 0.525581000  | 2.063282000  | -3.495705000 |
| 1 | 2.821762000  | -2.096681000 | -1.196440000 |
| 6 | -4.036027000 | 0.130169000  | 5.074321000  |
| 6 | -5.221656000 | -0.078676000 | 5.805891000  |
| 6 | -2.818662000 | -0.269066000 | 5.662050000  |
| 6 | -5.196340000 | -0.685544000 | 7.065300000  |

|   |              |              |             |
|---|--------------|--------------|-------------|
| 1 | -6.166684000 | 0.260410000  | 5.393985000 |
| 6 | -2.791864000 | -0.875323000 | 6.919957000 |
| 1 | -1.889672000 | -0.095427000 | 5.130541000 |
| 6 | -3.981087000 | -1.090996000 | 7.627254000 |
| 1 | -6.123866000 | -0.829496000 | 7.611448000 |
| 1 | -1.842027000 | -1.180019000 | 7.349248000 |
| 1 | -3.959054000 | -1.558753000 | 8.606693000 |
| 1 | -5.121543000 | 0.238429000  | 0.717272000 |

#### <sup>4</sup>TS1<sub>beta,HA,S2</sub>

|    |              |              |              |
|----|--------------|--------------|--------------|
| 26 | -3.935082000 | -2.792815000 | -2.087393000 |
| 16 | -5.638236000 | -4.178411000 | -2.993230000 |
| 1  | -6.191860000 | -3.272876000 | -3.877992000 |
| 6  | 5.540773000  | 4.866992000  | 0.105681000  |
| 6  | 5.475702000  | 3.323854000  | -0.051173000 |
| 6  | 4.052526000  | 2.715536000  | -0.003883000 |
| 6  | 3.216416000  | 3.083543000  | -1.244972000 |
| 6  | 4.132329000  | 1.183271000  | 0.145463000  |
| 6  | 5.105305000  | 5.367272000  | 1.474019000  |
| 8  | 4.068332000  | 6.070560000  | 1.631897000  |
| 1  | 4.899813000  | 5.356188000  | -0.630813000 |
| 1  | 5.944720000  | 3.058515000  | -1.009499000 |
| 1  | 6.089860000  | 2.854225000  | 0.731589000  |
| 1  | 3.539563000  | 3.112872000  | 0.885001000  |
| 1  | 2.183080000  | 2.740042000  | -1.126073000 |
| 1  | 3.188331000  | 4.165029000  | -1.421899000 |
| 1  | 3.635814000  | 2.611378000  | -2.143817000 |
| 1  | 3.129175000  | 0.744870000  | 0.185311000  |
| 1  | 4.661866000  | 0.896325000  | 1.061168000  |
| 1  | 4.659100000  | 0.738222000  | -0.709907000 |
| 7  | 5.904646000  | 5.015625000  | 2.520025000  |
| 6  | 5.612629000  | 5.342671000  | 3.918443000  |
| 6  | 5.892014000  | 4.163546000  | 4.869869000  |
| 6  | 5.145136000  | 2.876266000  | 4.554348000  |
| 6  | 3.780796000  | 2.877329000  | 4.213012000  |
| 6  | 3.108193000  | 1.681441000  | 3.940439000  |
| 6  | 3.786600000  | 0.458326000  | 4.014352000  |
| 6  | 5.142263000  | 0.442721000  | 4.359303000  |
| 6  | 5.814415000  | 1.642857000  | 4.621380000  |
| 1  | 6.714068000  | 4.440405000  | 2.332377000  |
| 1  | 4.563717000  | 5.642887000  | 3.958262000  |
| 1  | 6.971306000  | 3.956741000  | 4.883065000  |
| 1  | 5.645409000  | 4.505418000  | 5.886503000  |
| 1  | 3.242090000  | 3.817295000  | 4.137834000  |
| 1  | 2.061642000  | 1.698705000  | 3.652947000  |
| 1  | 3.261014000  | -0.463783000 | 3.790489000  |
| 1  | 5.679178000  | -0.499142000 | 4.416278000  |
| 1  | 6.869368000  | 1.622390000  | 4.883509000  |
| 6  | 0.801568000  | 1.997806000  | -4.446573000 |



|   |              |              |              |
|---|--------------|--------------|--------------|
| 6 | -0.123903000 | 3.091021000  | -3.871538000 |
| 6 | -1.464392000 | 3.243498000  | -4.610579000 |
| 6 | 0.241969000  | 0.571188000  | -4.316026000 |
| 1 | 1.003391000  | 2.217877000  | -5.507670000 |
| 1 | -0.309496000 | 2.880403000  | -2.808039000 |
| 1 | 0.406930000  | 4.054072000  | -3.904920000 |
| 1 | -1.300655000 | 3.453827000  | -5.677400000 |
| 1 | -2.070432000 | 2.331716000  | -4.542342000 |
| 1 | -2.042130000 | 4.071028000  | -4.185558000 |
| 1 | 0.964457000  | -0.173738000 | -4.674113000 |
| 1 | -0.681115000 | 0.442893000  | -4.891291000 |
| 1 | 0.012030000  | 0.334784000  | -3.269508000 |
| 6 | -2.479548000 | 7.489027000  | -0.916116000 |
| 6 | -1.224053000 | 7.193978000  | -0.055467000 |
| 6 | -0.068611000 | 6.534018000  | -0.829647000 |
| 6 | 1.097701000  | 6.125849000  | 0.088891000  |
| 7 | 0.679944000  | 5.053275000  | 1.009925000  |
| 6 | 0.757665000  | 5.101095000  | 2.341527000  |
| 7 | 1.595481000  | 5.980402000  | 2.961012000  |
| 7 | -0.009178000 | 4.274337000  | 3.080316000  |
| 6 | -3.032912000 | 6.240928000  | -1.590838000 |
| 8 | -2.711315000 | 5.962930000  | -2.777887000 |
| 1 | -2.217818000 | 8.180068000  | -1.723120000 |
| 1 | -1.501367000 | 6.545352000  | 0.785467000  |
| 1 | -0.875718000 | 8.140541000  | 0.383115000  |
| 1 | -0.429461000 | 5.651993000  | -1.371796000 |
| 1 | 0.315096000  | 7.226456000  | -1.591261000 |
| 1 | 1.947745000  | 5.779721000  | -0.505520000 |
| 1 | 1.442800000  | 6.982176000  | 0.674604000  |
| 1 | 0.250353000  | 4.189110000  | 0.585197000  |
| 1 | 2.474979000  | 6.243316000  | 2.511638000  |
| 1 | 1.453562000  | 6.207094000  | 3.931679000  |
| 1 | -0.715480000 | 3.641519000  | 2.623516000  |
| 1 | 0.219545000  | 4.116135000  | 4.049423000  |
| 7 | -3.835962000 | 5.413318000  | -0.863389000 |
| 6 | -4.321430000 | 4.137323000  | -1.446830000 |
| 6 | -5.323427000 | 3.616662000  | -0.399620000 |
| 6 | -4.800907000 | 4.205507000  | 0.930638000  |
| 6 | -4.308733000 | 5.608960000  | 0.527027000  |
| 1 | -3.474004000 | 3.454990000  | -1.586530000 |
| 1 | -6.329667000 | 4.000164000  | -0.613455000 |
| 1 | -5.377644000 | 2.524376000  | -0.385888000 |
| 1 | -5.566613000 | 4.244598000  | 1.711452000  |
| 1 | -3.957082000 | 3.613470000  | 1.304049000  |
| 1 | -3.505471000 | 5.964733000  | 1.176376000  |
| 1 | -5.126642000 | 6.344276000  | 0.557145000  |
| 6 | 1.074096000  | -1.762215000 | -7.997266000 |
| 6 | -0.202216000 | -1.130814000 | -8.511220000 |
| 6 | -1.158891000 | -1.889256000 | -9.207673000 |
| 6 | -2.343216000 | -1.303732000 | -9.673314000 |

|   |              |              |               |
|---|--------------|--------------|---------------|
| 6 | -2.589242000 | 0.055560000  | -9.450747000  |
| 6 | -1.643585000 | 0.823835000  | -8.757352000  |
| 6 | -0.462926000 | 0.234976000  | -8.293315000  |
| 1 | 1.081059000  | -1.811511000 | -6.900327000  |
| 1 | 1.197591000  | -2.781029000 | -8.378975000  |
| 1 | -0.972074000 | -2.944076000 | -9.390394000  |
| 1 | -3.068208000 | -1.907806000 | -10.210164000 |
| 1 | -3.503413000 | 0.512968000  | -9.816014000  |
| 1 | -1.823956000 | 1.879587000  | -8.579326000  |
| 1 | 0.263096000  | 0.838225000  | -7.755392000  |
| 6 | -5.586210000 | -3.456313000 | 0.863756000   |
| 6 | -4.562988000 | -4.309843000 | 0.486106000   |
| 6 | -4.108948000 | -5.437417000 | 1.270988000   |
| 6 | -3.064985000 | -6.003952000 | 0.597159000   |
| 6 | -2.870554000 | -5.233727000 | -0.612094000  |
| 7 | -3.796849000 | -4.209043000 | -0.668286000  |
| 6 | -1.898792000 | -5.493601000 | -1.567775000  |
| 6 | -1.729310000 | -4.771677000 | -2.735863000  |
| 6 | -0.761399000 | -5.088872000 | -3.765246000  |
| 6 | -0.946088000 | -4.195875000 | -4.780298000  |
| 6 | -2.023767000 | -3.313744000 | -4.383674000  |
| 7 | -2.483229000 | -3.673899000 | -3.124486000  |
| 6 | -2.511864000 | -2.277338000 | -5.159572000  |
| 6 | -3.529157000 | -1.414031000 | -4.777111000  |
| 6 | -3.980601000 | -0.282561000 | -5.558816000  |
| 6 | -4.942741000 | 0.351631000  | -4.824645000  |
| 6 | -5.098270000 | -0.388749000 | -3.590800000  |
| 7 | -4.230071000 | -1.474169000 | -3.586381000  |
| 6 | -5.992105000 | -0.058416000 | -2.584319000  |
| 6 | -6.173278000 | -0.776723000 | -1.409894000  |
| 6 | -7.178716000 | -0.488307000 | -0.407672000  |
| 6 | -7.077636000 | -1.457398000 | 0.551403000   |
| 6 | -6.003833000 | -2.342096000 | 0.150588000   |
| 7 | -5.460772000 | -1.904666000 | -1.043944000  |
| 1 | -6.097777000 | -3.674239000 | 1.795189000   |
| 1 | -1.238259000 | -6.336488000 | -1.396205000  |
| 1 | -2.055658000 | -2.113529000 | -6.129867000  |
| 1 | -6.618773000 | 0.813224000  | -2.740152000  |
| 8 | -1.588280000 | 2.452687000  | 1.869755000   |
| 6 | -1.051412000 | 2.020571000  | 0.774088000   |
| 8 | -0.272798000 | 2.713190000  | 0.023622000   |
| 6 | -1.336350000 | 0.556875000  | 0.335748000   |
| 6 | -2.841744000 | 0.292067000  | 0.294718000   |
| 6 | -3.583589000 | 0.013522000  | 1.576831000   |
| 1 | -0.953705000 | 0.493853000  | -0.687361000  |
| 1 | -3.359644000 | 0.968179000  | -0.395014000  |
| 1 | -2.931229000 | -0.863348000 | -0.504625000  |
| 1 | -3.442938000 | 0.866265000  | 2.258640000   |
| 1 | -3.195086000 | -0.876414000 | 2.083815000   |
| 8 | -2.774855000 | -1.731217000 | -1.291055000  |

|   |              |              |              |
|---|--------------|--------------|--------------|
| 1 | 1.956004000  | -1.183340000 | -8.296874000 |
| 1 | 1.772335000  | 2.048778000  | -3.932405000 |
| 1 | -4.763382000 | 4.318919000  | -2.430258000 |
| 1 | -3.241408000 | 7.973638000  | -0.292988000 |
| 1 | 6.569920000  | 5.204776000  | -0.081680000 |
| 1 | 6.206663000  | 6.210611000  | 4.235983000  |
| 1 | -7.668807000 | -1.578243000 | 1.447590000  |
| 1 | -4.539856000 | -5.737350000 | 2.215146000  |
| 1 | -5.501279000 | 1.240829000  | -5.078726000 |
| 1 | -7.873203000 | 0.337997000  | -0.455388000 |
| 1 | -2.471138000 | -6.861347000 | 0.878702000  |
| 1 | -0.050623000 | -5.900407000 | -3.706064000 |
| 1 | -3.590742000 | -0.019224000 | -6.531144000 |
| 1 | -0.415882000 | -4.125558000 | -5.718868000 |
| 6 | -0.558729000 | -0.451529000 | 1.187876000  |
| 6 | -0.044868000 | -1.606642000 | 0.570126000  |
| 6 | -0.361714000 | -0.284290000 | 2.570488000  |
| 6 | 0.649502000  | -2.567268000 | 1.313188000  |
| 1 | -0.221635000 | -1.762517000 | -0.488791000 |
| 6 | 0.331241000  | -1.248360000 | 3.314270000  |
| 1 | -0.761329000 | 0.600313000  | 3.053227000  |
| 6 | 0.841773000  | -2.392553000 | 2.689107000  |
| 1 | 1.033128000  | -3.453797000 | 0.817239000  |
| 1 | 0.461966000  | -1.109276000 | 4.384144000  |
| 1 | 1.372860000  | -3.143000000 | 3.267593000  |
| 1 | -4.653402000 | -0.123784000 | 1.398606000  |

#### <sup>4</sup>IM1<sub>beta,S2</sub>

|    |              |              |              |
|----|--------------|--------------|--------------|
| 26 | -3.954823000 | -2.985146000 | -2.257265000 |
| 16 | -5.580339000 | -4.369699000 | -3.258910000 |
| 1  | -5.944040000 | -3.530866000 | -4.294731000 |
| 6  | 5.532684000  | 4.740476000  | -0.042568000 |
| 6  | 5.445732000  | 3.193609000  | -0.118064000 |
| 6  | 4.020477000  | 2.608478000  | 0.038124000  |
| 6  | 3.126830000  | 2.912415000  | -1.179812000 |
| 6  | 4.091383000  | 1.087412000  | 0.278277000  |
| 6  | 5.170730000  | 5.318984000  | 1.317010000  |
| 8  | 4.184453000  | 6.091670000  | 1.474612000  |
| 1  | 4.860319000  | 5.199449000  | -0.770336000 |
| 1  | 5.858005000  | 2.874527000  | -1.085988000 |
| 1  | 6.097635000  | 2.753326000  | 0.651353000  |
| 1  | 3.558266000  | 3.066552000  | 0.925784000  |
| 1  | 2.095499000  | 2.596286000  | -0.989459000 |
| 1  | 3.104441000  | 3.981269000  | -1.422592000 |
| 1  | 3.494266000  | 2.378640000  | -2.066765000 |
| 1  | 3.086778000  | 0.664975000  | 0.389085000  |
| 1  | 4.658270000  | 0.851164000  | 1.186214000  |
| 1  | 4.574746000  | 0.583508000  | -0.570106000 |
| 7  | 5.982386000  | 4.965045000  | 2.352556000  |

|   |              |              |              |
|---|--------------|--------------|--------------|
| 6 | 5.764018000  | 5.380906000  | 3.740570000  |
| 6 | 6.009369000  | 4.238770000  | 4.745461000  |
| 6 | 5.183129000  | 2.980721000  | 4.523867000  |
| 6 | 3.806015000  | 3.039250000  | 4.244131000  |
| 6 | 3.062191000  | 1.870088000  | 4.051530000  |
| 6 | 3.680264000  | 0.617037000  | 4.147740000  |
| 6 | 5.047624000  | 0.544507000  | 4.434339000  |
| 6 | 5.791089000  | 1.717435000  | 4.614549000  |
| 1 | 6.746987000  | 4.330979000  | 2.167120000  |
| 1 | 4.737826000  | 5.748514000  | 3.800072000  |
| 1 | 7.075371000  | 3.971681000  | 4.735810000  |
| 1 | 5.817210000  | 4.647319000  | 5.749133000  |
| 1 | 3.311687000  | 4.002105000  | 4.154371000  |
| 1 | 2.006147000  | 1.931227000  | 3.808014000  |
| 1 | 3.099581000  | -0.284574000 | 3.984703000  |
| 1 | 5.538308000  | -0.421098000 | 4.508370000  |
| 1 | 6.854661000  | 1.652002000  | 4.830494000  |
| 6 | 0.772140000  | 2.016954000  | -4.406067000 |
| 6 | -0.177209000 | 3.075281000  | -3.805408000 |
| 6 | -1.557547000 | 3.146007000  | -4.480633000 |
| 6 | 0.306204000  | 0.566366000  | -4.196268000 |
| 1 | 0.892482000  | 2.213365000  | -5.484089000 |
| 1 | -0.302018000 | 2.878553000  | -2.730365000 |
| 1 | 0.301749000  | 4.062568000  | -3.883708000 |
| 1 | -1.454949000 | 3.333264000  | -5.559343000 |
| 1 | -2.116788000 | 2.210144000  | -4.359408000 |
| 1 | -2.150083000 | 3.959992000  | -4.050002000 |
| 1 | 1.039003000  | -0.148628000 | -4.592584000 |
| 1 | -0.650765000 | 0.371088000  | -4.692221000 |
| 1 | 0.173730000  | 0.349415000  | -3.128987000 |
| 6 | -2.406575000 | 7.550263000  | -0.970140000 |
| 6 | -1.129857000 | 7.270668000  | -0.135892000 |
| 6 | -0.013000000 | 6.548877000  | -0.911681000 |
| 6 | 1.170092000  | 6.154705000  | -0.008018000 |
| 7 | 0.751153000  | 5.142953000  | 0.978387000  |
| 6 | 0.861702000  | 5.259806000  | 2.303277000  |
| 7 | 1.737096000  | 6.147703000  | 2.855896000  |
| 7 | 0.090018000  | 4.495610000  | 3.102043000  |
| 6 | -3.010217000 | 6.282494000  | -1.559486000 |
| 8 | -2.739566000 | 5.937806000  | -2.741953000 |
| 1 | -2.157175000 | 8.192097000  | -1.820523000 |
| 1 | -1.392395000 | 6.669196000  | 0.743865000  |
| 1 | -0.748943000 | 8.229721000  | 0.244696000  |
| 1 | -0.409154000 | 5.651209000  | -1.400949000 |
| 1 | 0.363595000  | 7.196433000  | -1.715158000 |
| 1 | 1.991184000  | 5.753471000  | -0.608877000 |
| 1 | 1.556854000  | 7.029366000  | 0.522001000  |
| 1 | 0.282895000  | 4.270568000  | 0.610013000  |
| 1 | 2.612658000  | 6.361157000  | 2.374175000  |
| 1 | 1.624993000  | 6.428322000  | 3.816301000  |

|   |              |              |               |
|---|--------------|--------------|---------------|
| 1 | -0.644295000 | 3.858107000  | 2.694446000   |
| 1 | 0.336469000  | 4.383883000  | 4.073330000   |
| 7 | -3.801722000 | 5.510718000  | -0.761768000  |
| 6 | -4.327758000 | 4.214216000  | -1.258678000  |
| 6 | -5.298050000 | 3.765576000  | -0.150173000  |
| 6 | -4.720193000 | 4.416452000  | 1.127138000   |
| 6 | -4.222215000 | 5.787959000  | 0.631672000   |
| 1 | -3.496126000 | 3.511392000  | -1.390461000  |
| 1 | -6.307144000 | 4.149546000  | -0.349035000  |
| 1 | -5.361704000 | 2.676363000  | -0.074991000  |
| 1 | -5.457149000 | 4.510360000  | 1.930755000   |
| 1 | -3.872131000 | 3.831239000  | 1.501323000   |
| 1 | -3.391440000 | 6.164302000  | 1.232935000   |
| 1 | -5.027482000 | 6.537611000  | 0.649934000   |
| 6 | 1.126102000  | -1.675804000 | -7.985342000  |
| 6 | -0.152797000 | -1.054519000 | -8.505220000  |
| 6 | -1.079120000 | -1.808987000 | -9.245690000  |
| 6 | -2.264886000 | -1.232113000 | -9.718678000  |
| 6 | -2.542603000 | 0.114520000  | -9.459633000  |
| 6 | -1.627509000 | 0.878681000  | -8.721929000  |
| 6 | -0.445804000 | 0.298235000  | -8.250074000  |
| 1 | 1.121566000  | -1.741154000 | -6.889341000  |
| 1 | 1.268712000  | -2.686799000 | -8.381034000  |
| 1 | -0.867124000 | -2.853531000 | -9.457721000  |
| 1 | -2.965932000 | -1.832845000 | -10.289985000 |
| 1 | -3.457482000 | 0.565610000  | -9.830934000  |
| 1 | -1.832426000 | 1.924781000  | -8.515623000  |
| 1 | 0.255758000  | 0.897700000  | -7.676667000  |
| 6 | -5.525087000 | -3.752282000 | 0.711479000   |
| 6 | -4.532512000 | -4.609333000 | 0.264451000   |
| 6 | -4.079084000 | -5.781135000 | 0.980138000   |
| 6 | -3.066551000 | -6.334081000 | 0.248802000   |
| 6 | -2.888839000 | -5.510353000 | -0.926259000  |
| 7 | -3.800601000 | -4.468250000 | -0.905119000  |
| 6 | -1.935951000 | -5.734427000 | -1.907023000  |
| 6 | -1.761806000 | -4.947855000 | -3.032557000  |
| 6 | -0.794026000 | -5.212189000 | -4.075747000  |
| 6 | -0.961826000 | -4.252986000 | -5.032763000  |
| 6 | -2.031688000 | -3.386879000 | -4.585958000  |
| 7 | -2.498751000 | -3.821070000 | -3.356743000  |
| 6 | -2.515281000 | -2.305048000 | -5.302117000  |
| 6 | -3.542369000 | -1.477181000 | -4.877786000  |
| 6 | -4.002957000 | -0.312605000 | -5.601268000  |
| 6 | -4.978307000 | 0.271525000  | -4.843404000  |
| 6 | -5.130973000 | -0.529224000 | -3.648846000  |
| 7 | -4.255771000 | -1.606448000 | -3.695738000  |
| 6 | -6.010728000 | -0.241032000 | -2.617950000  |
| 6 | -6.150997000 | -0.994067000 | -1.462349000  |
| 6 | -7.126585000 | -0.738589000 | -0.426100000  |
| 6 | -6.995517000 | -1.731033000 | 0.505343000   |

|   |              |              |              |
|---|--------------|--------------|--------------|
| 6 | -5.935191000 | -2.603865000 | 0.054203000  |
| 7 | -5.417412000 | -2.126312000 | -1.141140000 |
| 1 | -6.016536000 | -3.998756000 | 1.646064000  |
| 1 | -1.286760000 | -6.594856000 | -1.788816000 |
| 1 | -2.053953000 | -2.081723000 | -6.257619000 |
| 1 | -6.646304000 | 0.630318000  | -2.730639000 |
| 8 | -1.571631000 | 2.668722000  | 2.027392000  |
| 6 | -1.090826000 | 2.173548000  | 0.931709000  |
| 8 | -0.308310000 | 2.804603000  | 0.131199000  |
| 6 | -1.462347000 | 0.710259000  | 0.560148000  |
| 6 | -2.961669000 | 0.508106000  | 0.580386000  |
| 6 | -3.733425000 | 0.286830000  | 1.841546000  |
| 1 | -1.115229000 | 0.583925000  | -0.469864000 |
| 1 | -3.498726000 | 0.876373000  | -0.294563000 |
| 1 | -3.039034000 | -1.375839000 | -0.693652000 |
| 1 | -3.687482000 | 1.184779000  | 2.480541000  |
| 1 | -3.313611000 | -0.534508000 | 2.436267000  |
| 8 | -2.723011000 | -1.962889000 | -1.423572000 |
| 1 | 2.003092000  | -1.080344000 | -8.266469000 |
| 1 | 1.769536000  | 2.139377000  | -3.959098000 |
| 1 | -4.802942000 | 4.351469000  | -2.233832000 |
| 1 | -3.136257000 | 8.084491000  | -0.349008000 |
| 1 | 6.553940000  | 5.058219000  | -0.297230000 |
| 1 | 6.420962000  | 6.225704000  | 3.989700000  |
| 1 | -7.562974000 | -1.877772000 | 1.412788000  |
| 1 | -4.487382000 | -6.116834000 | 1.922202000  |
| 1 | -5.543166000 | 1.168000000  | -5.053623000 |
| 1 | -7.824615000 | 0.085907000  | -0.433397000 |
| 1 | -2.480945000 | -7.214021000 | 0.471756000  |
| 1 | -0.092546000 | -6.033662000 | -4.063985000 |
| 1 | -3.606727000 | 0.005844000  | -6.554228000 |
| 1 | -0.425424000 | -4.128695000 | -5.962025000 |
| 6 | -0.703530000 | -0.298656000 | 1.433210000  |
| 6 | -0.236211000 | -1.487105000 | 0.842328000  |
| 6 | -0.489165000 | -0.099832000 | 2.808844000  |
| 6 | 0.436213000  | -2.448272000 | 1.605370000  |
| 1 | -0.429539000 | -1.669243000 | -0.210591000 |
| 6 | 0.180326000  | -1.065316000 | 3.572325000  |
| 1 | -0.855787000 | 0.811235000  | 3.268412000  |
| 6 | 0.648862000  | -2.241541000 | 2.973853000  |
| 1 | 0.786488000  | -3.359921000 | 1.130585000  |
| 1 | 0.325510000  | -0.902097000 | 4.637005000  |
| 1 | 1.162773000  | -2.991987000 | 3.567702000  |
| 1 | -4.784831000 | 0.062384000  | 1.634829000  |

<sup>4</sup>TS<sub>2</sub><sub>beta,DS,S2</sub>

|    |              |              |              |
|----|--------------|--------------|--------------|
| 26 | -4.758231000 | -0.661458000 | -2.481316000 |
| 16 | -6.660274000 | -1.314461000 | -3.943051000 |
| 1  | -5.976749000 | -1.363378000 | -5.143370000 |

|   |              |             |              |
|---|--------------|-------------|--------------|
| 6 | 4.228998000  | 7.697211000 | 1.774233000  |
| 6 | 4.860723000  | 7.459760000 | 0.382676000  |
| 6 | 3.985577000  | 6.669580000 | -0.619821000 |
| 6 | 2.674122000  | 7.408149000 | -0.952106000 |
| 6 | 4.786938000  | 6.377345000 | -1.903676000 |
| 6 | 3.873100000  | 6.441408000 | 2.558543000  |
| 8 | 2.725845000  | 6.301873000 | 3.070613000  |
| 1 | 3.306017000  | 8.274526000 | 1.686599000  |
| 1 | 5.099112000  | 8.441685000 | -0.051222000 |
| 1 | 5.826586000  | 6.943085000 | 0.491674000  |
| 1 | 3.730277000  | 5.702165000 | -0.160816000 |
| 1 | 2.085743000  | 6.836941000 | -1.679437000 |
| 1 | 2.048811000  | 7.557418000 | -0.064938000 |
| 1 | 2.882855000  | 8.392984000 | -1.391583000 |
| 1 | 4.186661000  | 5.798929000 | -2.614693000 |
| 1 | 5.691520000  | 5.798361000 | -1.683459000 |
| 1 | 5.089162000  | 7.310624000 | -2.397727000 |
| 7 | 4.855019000  | 5.515825000 | 2.708696000  |
| 6 | 4.698670000  | 4.260693000 | 3.454462000  |
| 6 | 5.524171000  | 3.115684000 | 2.835345000  |
| 6 | 5.093888000  | 2.713067000 | 1.435417000  |
| 6 | 3.817881000  | 2.165996000 | 1.208372000  |
| 6 | 3.413551000  | 1.779920000 | -0.074222000 |
| 6 | 4.295447000  | 1.931850000 | -1.153850000 |
| 6 | 5.568670000  | 2.473271000 | -0.944162000 |
| 6 | 5.963196000  | 2.863242000 | 0.342842000  |
| 1 | 5.742524000  | 5.677744000 | 2.253754000  |
| 1 | 3.635969000  | 4.009689000 | 3.457247000  |
| 1 | 6.587362000  | 3.395681000 | 2.831266000  |
| 1 | 5.441378000  | 2.256622000 | 3.515529000  |
| 1 | 3.128953000  | 2.027753000 | 2.036983000  |
| 1 | 2.420534000  | 1.363608000 | -0.216086000 |
| 1 | 3.990157000  | 1.618364000 | -2.146831000 |
| 1 | 6.257636000  | 2.585763000 | -1.776143000 |
| 1 | 6.960081000  | 3.268654000 | 0.501674000  |
| 6 | 1.899497000  | 3.615538000 | -4.114095000 |
| 6 | 0.815611000  | 3.397381000 | -3.036987000 |
| 6 | -0.625825000 | 3.436747000 | -3.569475000 |
| 6 | 1.979359000  | 2.493204000 | -5.163477000 |
| 1 | 1.719393000  | 4.577195000 | -4.619619000 |
| 1 | 0.986256000  | 2.436918000 | -2.531402000 |
| 1 | 0.933133000  | 4.171676000 | -2.264579000 |
| 1 | -0.838247000 | 4.396908000 | -4.060957000 |
| 1 | -0.805237000 | 2.639292000 | -4.299199000 |
| 1 | -1.349291000 | 3.297182000 | -2.758620000 |
| 1 | 2.791940000  | 2.672393000 | -5.878746000 |
| 1 | 1.048329000  | 2.408287000 | -5.735775000 |
| 1 | 2.160784000  | 1.525962000 | -4.680321000 |
| 6 | -3.319587000 | 4.810143000 | 0.333588000  |
| 6 | -1.993004000 | 5.240986000 | 1.017739000  |

|   |              |              |              |
|---|--------------|--------------|--------------|
| 6 | -0.736940000 | 4.811881000  | 0.231712000  |
| 6 | 0.520445000  | 4.702241000  | 1.116398000  |
| 7 | 0.433550000  | 3.491816000  | 1.949222000  |
| 6 | 0.391779000  | 3.428619000  | 3.281555000  |
| 7 | 0.817858000  | 4.459521000  | 4.060217000  |
| 7 | -0.081787000 | 2.303214000  | 3.858028000  |
| 6 | -3.514972000 | 3.302561000  | 0.411383000  |
| 8 | -3.079719000 | 2.558793000  | -0.518795000 |
| 1 | -3.295944000 | 5.075061000  | -0.727505000 |
| 1 | -1.957169000 | 4.805142000  | 2.025754000  |
| 1 | -1.994004000 | 6.331773000  | 1.149204000  |
| 1 | -0.908509000 | 3.839364000  | -0.244282000 |
| 1 | -0.545129000 | 5.530116000  | -0.576776000 |
| 1 | 1.414617000  | 4.621651000  | 0.488204000  |
| 1 | 0.643537000  | 5.586258000  | 1.747361000  |
| 1 | 0.323600000  | 2.581082000  | 1.418707000  |
| 1 | 1.464751000  | 5.170008000  | 3.707790000  |
| 1 | 0.567282000  | 4.483685000  | 5.034999000  |
| 1 | -0.525034000 | 1.552334000  | 3.266121000  |
| 1 | 0.114754000  | 2.113470000  | 4.827999000  |
| 7 | -4.100075000 | 2.792160000  | 1.523360000  |
| 6 | -4.233039000 | 1.320456000  | 1.732493000  |
| 6 | -5.187566000 | 1.216871000  | 2.932573000  |
| 6 | -4.898236000 | 2.500763000  | 3.741125000  |
| 6 | -4.664751000 | 3.568182000  | 2.653804000  |
| 1 | -3.246929000 | 0.897860000  | 1.954811000  |
| 1 | -6.230512000 | 1.205628000  | 2.594086000  |
| 1 | -5.015557000 | 0.305779000  | 3.512441000  |
| 1 | -5.709059000 | 2.777567000  | 4.422085000  |
| 1 | -3.984663000 | 2.371666000  | 4.334265000  |
| 1 | -3.978507000 | 4.352821000  | 2.984832000  |
| 1 | -5.610196000 | 4.045257000  | 2.358060000  |
| 6 | 1.076011000  | -3.894629000 | -6.334910000 |
| 6 | 0.544891000  | -5.105309000 | -5.596874000 |
| 6 | 0.677894000  | -5.208001000 | -4.199873000 |
| 6 | 0.217037000  | -6.340348000 | -3.518634000 |
| 6 | -0.390499000 | -7.388866000 | -4.221771000 |
| 6 | -0.535583000 | -7.294309000 | -5.610982000 |
| 6 | -0.071888000 | -6.161671000 | -6.289927000 |
| 1 | 0.954070000  | -2.982412000 | -5.740664000 |
| 1 | 2.148196000  | -3.999440000 | -6.551162000 |
| 1 | 1.138264000  | -4.394645000 | -3.646019000 |
| 1 | 0.329640000  | -6.401206000 | -2.440363000 |
| 1 | -0.747304000 | -8.267741000 | -3.693599000 |
| 1 | -1.011050000 | -8.098256000 | -6.164716000 |
| 1 | -0.189614000 | -6.094417000 | -7.368217000 |
| 6 | -7.007786000 | 1.465865000  | -0.972435000 |
| 6 | -6.962247000 | 0.154251000  | -0.521657000 |
| 6 | -7.782143000 | -0.381107000 | 0.543458000  |
| 6 | -7.411937000 | -1.685519000 | 0.720853000  |



|   |              |              |              |
|---|--------------|--------------|--------------|
| 6 | -6.368472000 | -1.968264000 | -0.239814000 |
| 7 | -6.109534000 | -0.832173000 | -0.990023000 |
| 6 | -5.746530000 | -3.199002000 | -0.386288000 |
| 6 | -4.789591000 | -3.498172000 | -1.344111000 |
| 6 | -4.212928000 | -4.812474000 | -1.548185000 |
| 6 | -3.370608000 | -4.720976000 | -2.620466000 |
| 6 | -3.421594000 | -3.349638000 | -3.083136000 |
| 7 | -4.279540000 | -2.617552000 | -2.280475000 |
| 6 | -2.741011000 | -2.869997000 | -4.191466000 |
| 6 | -2.820437000 | -1.569920000 | -4.669246000 |
| 6 | -2.086227000 | -1.067004000 | -5.809534000 |
| 6 | -2.393716000 | 0.260070000  | -5.935618000 |
| 6 | -3.325234000 | 0.584334000  | -4.877397000 |
| 7 | -3.583313000 | -0.548998000 | -4.123602000 |
| 6 | -3.865662000 | 1.844065000  | -4.660145000 |
| 6 | -4.769714000 | 2.160461000  | -3.659084000 |
| 6 | -5.397441000 | 3.454756000  | -3.500067000 |
| 6 | -6.289107000 | 3.346027000  | -2.471141000 |
| 6 | -6.214334000 | 1.985170000  | -1.983211000 |
| 7 | -5.266239000 | 1.283627000  | -2.708511000 |
| 1 | -7.725719000 | 2.131728000  | -0.505876000 |
| 1 | -6.058840000 | -3.998697000 | 0.276735000  |
| 1 | -2.098176000 | -3.563526000 | -4.721975000 |
| 1 | -3.569865000 | 2.638071000  | -5.336763000 |
| 8 | -1.111127000 | 0.384218000  | 2.238678000  |
| 6 | -0.569390000 | 0.310799000  | 1.069058000  |
| 8 | 0.219198000  | 1.201408000  | 0.582440000  |
| 6 | -0.911103000 | -0.919694000 | 0.188301000  |
| 6 | -1.246141000 | -2.090559000 | 1.011398000  |
| 6 | -1.341681000 | -3.485248000 | 0.508172000  |
| 1 | -1.894515000 | -0.619776000 | -0.355760000 |
| 1 | -1.591264000 | -1.871754000 | 2.018716000  |
| 1 | -3.278796000 | 0.795925000  | -1.117313000 |
| 1 | -0.721450000 | -3.656338000 | -0.376092000 |
| 1 | -2.380747000 | -3.721732000 | 0.217305000  |
| 8 | -3.311980000 | -0.177271000 | -1.322212000 |
| 1 | 0.564845000  | -3.752934000 | -7.293551000 |
| 1 | 2.876881000  | 3.705430000  | -3.616635000 |
| 1 | -4.613177000 | 0.845318000  | 0.827812000  |
| 1 | -4.162914000 | 5.340598000  | 0.789765000  |
| 1 | 4.920765000  | 8.295414000  | 2.385313000  |
| 1 | 5.003085000  | 4.410389000  | 4.500130000  |
| 1 | -6.955065000 | 4.100983000  | -2.078396000 |
| 1 | -8.540700000 | 0.177855000  | 1.072418000  |
| 1 | -2.033828000 | 0.964891000  | -6.671204000 |
| 1 | -5.184490000 | 4.316811000  | -4.115491000 |
| 1 | -7.806267000 | -2.404036000 | 1.424856000  |
| 1 | -4.446411000 | -5.682681000 | -0.951561000 |
| 1 | -1.423902000 | -1.663005000 | -6.420380000 |
| 1 | -2.766276000 | -5.494512000 | -3.071626000 |

|   |              |              |              |
|---|--------------|--------------|--------------|
| 6 | 0.130896000  | -1.153395000 | -0.900043000 |
| 6 | -0.119909000 | -0.791202000 | -2.231273000 |
| 6 | 1.381415000  | -1.712413000 | -0.576170000 |
| 6 | 0.860020000  | -0.975391000 | -3.215386000 |
| 1 | -1.086039000 | -0.369631000 | -2.485271000 |
| 6 | 2.360854000  | -1.899009000 | -1.556230000 |
| 1 | 1.587399000  | -1.989598000 | 0.454148000  |
| 6 | 2.103947000  | -1.527440000 | -2.883536000 |
| 1 | 0.645707000  | -0.686512000 | -4.239637000 |
| 1 | 3.323200000  | -2.323764000 | -1.285483000 |
| 1 | 2.865035000  | -1.665329000 | -3.646495000 |
| 1 | -1.067065000 | -4.211815000 | 1.285030000  |

$^4\text{Pr}_{\text{beta,DS,S2}}$

|    |              |              |              |
|----|--------------|--------------|--------------|
| 26 | -5.094606000 | -0.774972000 | -3.081212000 |
| 16 | -6.975605000 | -1.664105000 | -4.495999000 |
| 1  | -6.367660000 | -1.535852000 | -5.731624000 |
| 6  | 4.769044000  | 7.862440000  | 0.950851000  |
| 6  | 4.903016000  | 7.343288000  | -0.503939000 |
| 6  | 3.636152000  | 6.680230000  | -1.094073000 |
| 6  | 2.427753000  | 7.636615000  | -1.111640000 |
| 6  | 3.934714000  | 6.144201000  | -2.507989000 |
| 6  | 4.386604000  | 6.787565000  | 1.956255000  |
| 8  | 3.242752000  | 6.770861000  | 2.492649000  |
| 1  | 4.003088000  | 8.638205000  | 1.011835000  |
| 1  | 5.189991000  | 8.194199000  | -1.138841000 |
| 1  | 5.732765000  | 6.623570000  | -0.560015000 |
| 1  | 3.380161000  | 5.818108000  | -0.459746000 |
| 1  | 1.562854000  | 7.152201000  | -1.580079000 |
| 1  | 2.132366000  | 7.938120000  | -0.101162000 |
| 1  | 2.654104000  | 8.542578000  | -1.690289000 |
| 1  | 3.058101000  | 5.636312000  | -2.926054000 |
| 1  | 4.761126000  | 5.424036000  | -2.492472000 |
| 1  | 4.205769000  | 6.962393000  | -3.188711000 |
| 7  | 5.343205000  | 5.861979000  | 2.232831000  |
| 6  | 5.176054000  | 4.733992000  | 3.157343000  |
| 6  | 5.844054000  | 3.444790000  | 2.631577000  |
| 6  | 5.196112000  | 2.867936000  | 1.386813000  |
| 6  | 3.961628000  | 2.199775000  | 1.473467000  |
| 6  | 3.344160000  | 1.671923000  | 0.333876000  |
| 6  | 3.964736000  | 1.804108000  | -0.916011000 |
| 6  | 5.196956000  | 2.460577000  | -1.017020000 |
| 6  | 5.807285000  | 2.988898000  | 0.128023000  |
| 1  | 6.233045000  | 5.942353000  | 1.759951000  |
| 1  | 4.104187000  | 4.578965000  | 3.293789000  |
| 1  | 6.909645000  | 3.641644000  | 2.444716000  |
| 1  | 5.808622000  | 2.709733000  | 3.446485000  |
| 1  | 3.471490000  | 2.078675000  | 2.435298000  |
| 1  | 2.389535000  | 1.166666000  | 0.441850000  |

|   |              |              |              |
|---|--------------|--------------|--------------|
| 1 | 3.493584000  | 1.390005000  | -1.801691000 |
| 1 | 5.687406000  | 2.553920000  | -1.981556000 |
| 1 | 6.773103000  | 3.482385000  | 0.044803000  |
| 6 | 1.574205000  | 2.587366000  | -4.554172000 |
| 6 | 0.684998000  | 2.814731000  | -3.312532000 |
| 6 | -0.823619000 | 2.831359000  | -3.609813000 |
| 6 | 1.441486000  | 1.182926000  | -5.168845000 |
| 1 | 1.329047000  | 3.344278000  | -5.314746000 |
| 1 | 0.903211000  | 2.035040000  | -2.567225000 |
| 1 | 0.970117000  | 3.769044000  | -2.844249000 |
| 1 | -1.073219000 | 3.638899000  | -4.311759000 |
| 1 | -1.160630000 | 1.889877000  | -4.057586000 |
| 1 | -1.408164000 | 2.976836000  | -2.695266000 |
| 1 | 2.109023000  | 1.065283000  | -6.031583000 |
| 1 | 0.418777000  | 0.983289000  | -5.507735000 |
| 1 | 1.704037000  | 0.410590000  | -4.433513000 |
| 6 | -3.004351000 | 4.469396000  | 0.530941000  |
| 6 | -1.694068000 | 4.880636000  | 1.253007000  |
| 6 | -0.408638000 | 4.455207000  | 0.521717000  |
| 6 | 0.858112000  | 4.702060000  | 1.365271000  |
| 7 | 0.863729000  | 3.810850000  | 2.535128000  |
| 6 | 0.954233000  | 4.172492000  | 3.817849000  |
| 7 | 1.447854000  | 5.386125000  | 4.180530000  |
| 7 | 0.545011000  | 3.300246000  | 4.762119000  |
| 6 | -3.201331000 | 2.964452000  | 0.440842000  |
| 8 | -2.804771000 | 2.341033000  | -0.597291000 |
| 1 | -2.987691000 | 4.839699000  | -0.498419000 |
| 1 | -1.683468000 | 4.453954000  | 2.264186000  |
| 1 | -1.699662000 | 5.973320000  | 1.374116000  |
| 1 | -0.457931000 | 3.392544000  | 0.257489000  |
| 1 | -0.315568000 | 5.008623000  | -0.422772000 |
| 1 | 1.750922000  | 4.501855000  | 0.762687000  |
| 1 | 0.910598000  | 5.744013000  | 1.693025000  |
| 1 | 0.723024000  | 2.779602000  | 2.335441000  |
| 1 | 2.054485000  | 5.926594000  | 3.557769000  |
| 1 | 1.293722000  | 5.728813000  | 5.114612000  |
| 1 | 0.043980000  | 2.415088000  | 4.483546000  |
| 1 | 0.829793000  | 3.424784000  | 5.720683000  |
| 7 | -3.770056000 | 2.315875000  | 1.479749000  |
| 6 | -3.971082000 | 0.837839000  | 1.461179000  |
| 6 | -4.722983000 | 0.554397000  | 2.773144000  |
| 6 | -4.265794000 | 1.694714000  | 3.709040000  |
| 6 | -4.201547000 | 2.912963000  | 2.770041000  |
| 1 | -2.995299000 | 0.342143000  | 1.444983000  |
| 1 | -5.806334000 | 0.595664000  | 2.607334000  |
| 1 | -4.481390000 | -0.435407000 | 3.169461000  |
| 1 | -4.942997000 | 1.859002000  | 4.552546000  |
| 1 | -3.262184000 | 1.479774000  | 4.094718000  |
| 1 | -3.489961000 | 3.665988000  | 3.113298000  |
| 1 | -5.186729000 | 3.387682000  | 2.657921000  |

|   |              |              |              |
|---|--------------|--------------|--------------|
| 6 | 1.923952000  | -2.671694000 | -7.015040000 |
| 6 | 1.263289000  | -3.893274000 | -6.413795000 |
| 6 | 1.708001000  | -4.418017000 | -5.186033000 |
| 6 | 1.091563000  | -5.536849000 | -4.616420000 |
| 6 | 0.015581000  | -6.155951000 | -5.266671000 |
| 6 | -0.435581000 | -5.646575000 | -6.489714000 |
| 6 | 0.185722000  | -4.525958000 | -7.056819000 |
| 1 | 1.624749000  | -1.755654000 | -6.488221000 |
| 1 | 3.016560000  | -2.736257000 | -6.953594000 |
| 1 | 2.547042000  | -3.948904000 | -4.678732000 |
| 1 | 1.453152000  | -5.929267000 | -3.670805000 |
| 1 | -0.457422000 | -7.030339000 | -4.830592000 |
| 1 | -1.263680000 | -6.122515000 | -7.005827000 |
| 1 | -0.163295000 | -4.144155000 | -8.012544000 |
| 6 | -7.311543000 | 1.327698000  | -1.501624000 |
| 6 | -7.165477000 | 0.046062000  | -0.986981000 |
| 6 | -7.890792000 | -0.473201000 | 0.151580000  |
| 6 | -7.444959000 | -1.749414000 | 0.365792000  |
| 6 | -6.442598000 | -2.025807000 | -0.639104000 |
| 7 | -6.290128000 | -0.919294000 | -1.460649000 |
| 6 | -5.734002000 | -3.215913000 | -0.741049000 |
| 6 | -4.762198000 | -3.488397000 | -1.692157000 |
| 6 | -4.053615000 | -4.745907000 | -1.811863000 |
| 6 | -3.219042000 | -4.637617000 | -2.888007000 |
| 6 | -3.407611000 | -3.313284000 | -3.441798000 |
| 7 | -4.342283000 | -2.619138000 | -2.687439000 |
| 6 | -2.762648000 | -2.831656000 | -4.570973000 |
| 6 | -2.962974000 | -1.574219000 | -5.126064000 |
| 6 | -2.260336000 | -1.068226000 | -6.284055000 |
| 6 | -2.700948000 | 0.210240000  | -6.496737000 |
| 6 | -3.677544000 | 0.500884000  | -5.470047000 |
| 7 | -3.835513000 | -0.606240000 | -4.650598000 |
| 6 | -4.331423000 | 1.717468000  | -5.322906000 |
| 6 | -5.245197000 | 2.016852000  | -4.324021000 |
| 6 | -5.946516000 | 3.277908000  | -4.200017000 |
| 6 | -6.785221000 | 3.167912000  | -3.127531000 |
| 6 | -6.606866000 | 1.838375000  | -2.581192000 |
| 7 | -5.651876000 | 1.155347000  | -3.317368000 |
| 1 | -8.040084000 | 1.976631000  | -1.027115000 |
| 1 | -5.966822000 | -3.997689000 | -0.025768000 |
| 1 | -2.048739000 | -3.486441000 | -5.058777000 |
| 1 | -4.108918000 | 2.494060000  | -6.046887000 |
| 8 | -0.656723000 | 1.018127000  | 3.933693000  |
| 6 | -0.200732000 | 0.541033000  | 2.821811000  |
| 8 | 0.555949000  | 1.213078000  | 2.016813000  |
| 6 | -0.568611000 | -0.874690000 | 2.431175000  |
| 6 | -1.251304000 | -1.612936000 | 3.337392000  |
| 6 | -1.791960000 | -3.005271000 | 3.185522000  |
| 1 | -3.209792000 | 0.859657000  | -1.376183000 |
| 1 | -1.453673000 | -1.117728000 | 4.285123000  |

|   |              |              |              |
|---|--------------|--------------|--------------|
| 1 | -2.730252000 | -0.691940000 | -1.488593000 |
| 1 | -1.759315000 | -3.361465000 | 2.152824000  |
| 1 | -2.832353000 | -3.047619000 | 3.535439000  |
| 8 | -3.406114000 | -0.041847000 | -1.746612000 |
| 1 | 1.653199000  | -2.549374000 | -8.068773000 |
| 1 | 2.625162000  | 2.758175000  | -4.277338000 |
| 1 | -4.520206000 | 0.538727000  | 0.566593000  |
| 1 | -3.858073000 | 4.934418000  | 1.037836000  |
| 1 | 5.721174000  | 8.318476000  | 1.255599000  |
| 1 | 5.601921000  | 4.994459000  | 4.136742000  |
| 1 | -7.473742000 | 3.903712000  | -2.737363000 |
| 1 | -8.643695000 | 0.073626000  | 0.701091000  |
| 1 | -2.399991000 | 0.902378000  | -7.270051000 |
| 1 | -5.810752000 | 4.122042000  | -4.860709000 |
| 1 | -7.759734000 | -2.449195000 | 1.126622000  |
| 1 | -4.193816000 | -5.592710000 | -1.155503000 |
| 1 | -1.527812000 | -1.629430000 | -6.845877000 |
| 1 | -2.535230000 | -5.372395000 | -3.287238000 |
| 6 | -0.162351000 | -1.371067000 | 1.085565000  |
| 6 | -0.435638000 | -0.625748000 | -0.081825000 |
| 6 | 0.485732000  | -2.612410000 | 0.940303000  |
| 6 | -0.103180000 | -1.125186000 | -1.346111000 |
| 1 | -0.894823000 | 0.351660000  | 0.005897000  |
| 6 | 0.823144000  | -3.109902000 | -0.324424000 |
| 1 | 0.740807000  | -3.183560000 | 1.827169000  |
| 6 | 0.522093000  | -2.373882000 | -1.473935000 |
| 1 | -0.330810000 | -0.538546000 | -2.231517000 |
| 1 | 1.321595000  | -4.071206000 | -0.407765000 |
| 1 | 0.769294000  | -2.763736000 | -2.456518000 |
| 1 | -1.231351000 | -3.720437000 | 3.805763000  |

$^4\text{TS}_{\text{beta,DC,S2}}$

|    |              |              |              |
|----|--------------|--------------|--------------|
| 26 | -4.614826000 | -2.801853000 | -2.526036000 |
| 16 | -6.316550000 | -4.032097000 | -3.623374000 |
| 1  | -6.608813000 | -3.103210000 | -4.603050000 |
| 6  | 6.308032000  | 7.154142000  | 1.474304000  |
| 6  | 6.482002000  | 6.754232000  | -0.014777000 |
| 6  | 5.172863000  | 6.584502000  | -0.821282000 |
| 6  | 4.316933000  | 7.866085000  | -0.827331000 |
| 6  | 5.502783000  | 6.141480000  | -2.260528000 |
| 6  | 5.504000000  | 6.150941000  | 2.284282000  |
| 8  | 4.287958000  | 6.354547000  | 2.557345000  |
| 1  | 5.793184000  | 8.114059000  | 1.551988000  |
| 1  | 7.099455000  | 7.526285000  | -0.496598000 |
| 1  | 7.054370000  | 5.817083000  | -0.072427000 |
| 1  | 4.586377000  | 5.781857000  | -0.350042000 |
| 1  | 3.429060000  | 7.730266000  | -1.456040000 |
| 1  | 3.973870000  | 8.131148000  | 0.178032000  |
| 1  | 4.884496000  | 8.714004000  | -1.234788000 |

|   |              |              |              |
|---|--------------|--------------|--------------|
| 1 | 4.586464000  | 5.975262000  | -2.838032000 |
| 1 | 6.077190000  | 5.207618000  | -2.268555000 |
| 1 | 6.092619000  | 6.908567000  | -2.780137000 |
| 7 | 6.174229000  | 5.034911000  | 2.679958000  |
| 6 | 5.591459000  | 3.924597000  | 3.441891000  |
| 6 | 5.824720000  | 2.549847000  | 2.772844000  |
| 6 | 5.081066000  | 2.360290000  | 1.465080000  |
| 6 | 3.707736000  | 2.058346000  | 1.468281000  |
| 6 | 2.998031000  | 1.902955000  | 0.272066000  |
| 6 | 3.664659000  | 2.045363000  | -0.952944000 |
| 6 | 5.034172000  | 2.335163000  | -0.972122000 |
| 6 | 5.736308000  | 2.492666000  | 0.229731000  |
| 1 | 7.146898000  | 4.951769000  | 2.417070000  |
| 1 | 4.522768000  | 4.126362000  | 3.536025000  |
| 1 | 6.903448000  | 2.404874000  | 2.618765000  |
| 1 | 5.512889000  | 1.783566000  | 3.494956000  |
| 1 | 3.186764000  | 1.933256000  | 2.414154000  |
| 1 | 1.935970000  | 1.677967000  | 0.301305000  |
| 1 | 3.118594000  | 1.921565000  | -1.882451000 |
| 1 | 5.556967000  | 2.430225000  | -1.919179000 |
| 1 | 6.802814000  | 2.703784000  | 0.208199000  |
| 6 | 0.526273000  | 0.469293000  | -3.408855000 |
| 6 | -0.102436000 | 1.815349000  | -2.987571000 |
| 6 | -1.615971000 | 1.911788000  | -3.243986000 |
| 6 | 0.118187000  | -0.718653000 | -2.520800000 |
| 1 | 0.249999000  | 0.258394000  | -4.454195000 |
| 1 | 0.089741000  | 1.985819000  | -1.918018000 |
| 1 | 0.399367000  | 2.629661000  | -3.531650000 |
| 1 | -1.844893000 | 1.747291000  | -4.305626000 |
| 1 | -2.169247000 | 1.158079000  | -2.670887000 |
| 1 | -1.988395000 | 2.903168000  | -2.962924000 |
| 1 | 0.605870000  | -1.645186000 | -2.850754000 |
| 1 | -0.962742000 | -0.895256000 | -2.533389000 |
| 1 | 0.415832000  | -0.538917000 | -1.479325000 |
| 6 | -1.857234000 | 7.054505000  | -0.446516000 |
| 6 | -0.664605000 | 6.713452000  | 0.483475000  |
| 6 | 0.424049000  | 5.852670000  | -0.181904000 |
| 6 | 1.512562000  | 5.402972000  | 0.811034000  |
| 7 | 0.941743000  | 4.499270000  | 1.825633000  |
| 6 | 0.990146000  | 4.659453000  | 3.151020000  |
| 7 | 1.881466000  | 5.501459000  | 3.732758000  |
| 7 | 0.128629000  | 3.969748000  | 3.929293000  |
| 6 | -2.561043000 | 5.812034000  | -0.978317000 |
| 8 | -2.247646000 | 5.333569000  | -2.102604000 |
| 1 | -1.494618000 | 7.598841000  | -1.323867000 |
| 1 | -1.035841000 | 6.188510000  | 1.373030000  |
| 1 | -0.220658000 | 7.654966000  | 0.838514000  |
| 1 | -0.025783000 | 4.969763000  | -0.651627000 |
| 1 | 0.906588000  | 6.418185000  | -0.990848000 |
| 1 | 2.310734000  | 4.872693000  | 0.280201000  |

|   |              |              |               |
|---|--------------|--------------|---------------|
| 1 | 1.963880000  | 6.265843000  | 1.307256000   |
| 1 | 0.436313000  | 3.660516000  | 1.458951000   |
| 1 | 2.730759000  | 5.820394000  | 3.257521000   |
| 1 | 1.735750000  | 5.796448000  | 4.684606000   |
| 1 | -0.656227000 | 3.422714000  | 3.515133000   |
| 1 | 0.312007000  | 3.867534000  | 4.914788000   |
| 7 | -3.498250000 | 5.214505000  | -0.189439000  |
| 6 | -4.171680000 | 3.967904000  | -0.634684000  |
| 6 | -5.296116000 | 3.777023000  | 0.398548000   |
| 6 | -4.719072000 | 4.419894000  | 1.679801000   |
| 6 | -3.962985000 | 5.653670000  | 1.147535000   |
| 1 | -3.454463000 | 3.138603000  | -0.620297000  |
| 1 | -6.200851000 | 4.311019000  | 0.079749000   |
| 1 | -5.556697000 | 2.724155000  | 0.534654000   |
| 1 | -5.488537000 | 4.691012000  | 2.409236000   |
| 1 | -4.011016000 | 3.733851000  | 2.159095000   |
| 1 | -3.124400000 | 5.929784000  | 1.791828000   |
| 1 | -4.629449000 | 6.524525000  | 1.058465000   |
| 6 | 1.788359000  | -2.876909000 | -6.055886000  |
| 6 | 0.881686000  | -2.610921000 | -7.237686000  |
| 6 | 0.467148000  | -3.658050000 | -8.080512000  |
| 6 | -0.401887000 | -3.420543000 | -9.152438000  |
| 6 | -0.867471000 | -2.124911000 | -9.405905000  |
| 6 | -0.455918000 | -1.071136000 | -8.579667000  |
| 6 | 0.409404000  | -1.313833000 | -7.506426000  |
| 1 | 1.203783000  | -3.083677000 | -5.149194000  |
| 1 | 2.435396000  | -3.742671000 | -6.234173000  |
| 1 | 0.834947000  | -4.664791000 | -7.898974000  |
| 1 | -0.708954000 | -4.243520000 | -9.790662000  |
| 1 | -1.536452000 | -1.937771000 | -10.239912000 |
| 1 | -0.801020000 | -0.059953000 | -8.774472000  |
| 1 | 0.722139000  | -0.491422000 | -6.869212000  |
| 6 | -6.732912000 | -2.979452000 | 0.183527000   |
| 6 | -5.824012000 | -4.010009000 | 0.005965000   |
| 6 | -5.668965000 | -5.131109000 | 0.905687000   |
| 6 | -4.633816000 | -5.887743000 | 0.433950000   |
| 6 | -4.149624000 | -5.247910000 | -0.768682000  |
| 7 | -4.890687000 | -4.104266000 | -1.015948000  |
| 6 | -3.115540000 | -5.729518000 | -1.556112000  |
| 6 | -2.695521000 | -5.154947000 | -2.743740000  |
| 6 | -1.682890000 | -5.715140000 | -3.613759000  |
| 6 | -1.606618000 | -4.909479000 | -4.713546000  |
| 6 | -2.561712000 | -3.837975000 | -4.523896000  |
| 7 | -3.211055000 | -4.002680000 | -3.312877000  |
| 6 | -2.767573000 | -2.804818000 | -5.422670000  |
| 6 | -3.642968000 | -1.750286000 | -5.217944000  |
| 6 | -3.776912000 | -0.616642000 | -6.105305000  |
| 6 | -4.667862000 | 0.244200000  | -5.529102000  |
| 6 | -5.101564000 | -0.356761000 | -4.287224000  |
| 7 | -4.474400000 | -1.584458000 | -4.121288000  |

|   |              |              |              |
|---|--------------|--------------|--------------|
| 6 | -6.016619000 | 0.211758000  | -3.415969000 |
| 6 | -6.469694000 | -0.380638000 | -2.246942000 |
| 6 | -7.515950000 | 0.154019000  | -1.403932000 |
| 6 | -7.740748000 | -0.759019000 | -0.411054000 |
| 6 | -6.824249000 | -1.857022000 | -0.624109000 |
| 7 | -6.047340000 | -1.601223000 | -1.743871000 |
| 1 | -7.404171000 | -3.043595000 | 1.032654000  |
| 1 | -2.622557000 | -6.640329000 | -1.235145000 |
| 1 | -2.179626000 | -2.802158000 | -6.333319000 |
| 1 | -6.431769000 | 1.176836000  | -3.684337000 |
| 8 | -1.780212000 | 2.382013000  | 2.725060000  |
| 6 | -1.283039000 | 1.855397000  | 1.681990000  |
| 8 | -0.318539000 | 2.219576000  | 0.941876000  |
| 6 | -2.283369000 | -0.075705000 | 0.981825000  |
| 6 | -3.645596000 | 0.161365000  | 1.021738000  |
| 6 | -4.571483000 | -0.110841000 | 2.173774000  |
| 1 | -1.787961000 | 0.085283000  | 0.027770000  |
| 1 | -4.067451000 | 0.732843000  | 0.194854000  |
| 1 | -3.600794000 | -1.441664000 | -0.781921000 |
| 1 | -4.603425000 | 0.743506000  | 2.869611000  |
| 1 | -4.258788000 | -0.985183000 | 2.755194000  |
| 8 | -3.345776000 | -1.896352000 | -1.620483000 |
| 1 | 2.426668000  | -2.014182000 | -5.838447000 |
| 1 | 1.623783000  | 0.564237000  | -3.394634000 |
| 1 | -4.526266000 | 4.082836000  | -1.662254000 |
| 1 | -2.558191000 | 7.707690000  | 0.087633000  |
| 1 | 7.301220000  | 7.277635000  | 1.926893000  |
| 1 | 6.022695000  | 3.916428000  | 4.452368000  |
| 1 | -8.458381000 | -0.710013000 | 0.395056000  |
| 1 | -6.272883000 | -5.295084000 | 1.786164000  |
| 1 | -5.005161000 | 1.203694000  | -5.893064000 |
| 1 | -8.016579000 | 1.096159000  | -1.573982000 |
| 1 | -4.224673000 | -6.797214000 | 0.849049000  |
| 1 | -1.124245000 | -6.614838000 | -3.400059000 |
| 1 | -3.232981000 | -0.505655000 | -7.031616000 |
| 1 | -0.974356000 | -5.010258000 | -5.583408000 |
| 6 | -1.553741000 | -0.999889000 | 1.898462000  |
| 6 | -0.776230000 | -2.034598000 | 1.339591000  |
| 6 | -1.612748000 | -0.891883000 | 3.302407000  |
| 6 | -0.093414000 | -2.941161000 | 2.156491000  |
| 1 | -0.728902000 | -2.133140000 | 0.259275000  |
| 6 | -0.929744000 | -1.800429000 | 4.117825000  |
| 1 | -2.158519000 | -0.066316000 | 3.743884000  |
| 6 | -0.170037000 | -2.830702000 | 3.550187000  |
| 1 | 0.495772000  | -3.733817000 | 1.704442000  |
| 1 | -0.984987000 | -1.698913000 | 5.198273000  |
| 1 | 0.359244000  | -3.535040000 | 4.185361000  |
| 1 | -5.594727000 | -0.281306000 | 1.819933000  |



<sup>4</sup>Pr<sub>beta,DC,S2</sub>

|    |              |              |              |
|----|--------------|--------------|--------------|
| 26 | -3.183624000 | -3.828212000 | -1.971744000 |
| 16 | -4.556884000 | -5.719388000 | -2.272405000 |
| 1  | -5.239238000 | -5.287027000 | -3.393056000 |
| 6  | 5.987812000  | 3.835782000  | 1.537586000  |
| 6  | 5.994137000  | 5.002203000  | 0.512887000  |
| 6  | 5.039993000  | 6.180072000  | 0.820591000  |
| 6  | 5.308155000  | 6.805605000  | 2.203221000  |
| 6  | 5.149745000  | 7.240604000  | -0.293026000 |
| 6  | 4.636398000  | 3.155696000  | 1.679087000  |
| 8  | 3.835042000  | 3.476594000  | 2.601857000  |
| 1  | 6.269436000  | 4.201478000  | 2.527744000  |
| 1  | 7.023622000  | 5.385593000  | 0.456008000  |
| 1  | 5.751947000  | 4.606439000  | -0.483723000 |
| 1  | 4.010243000  | 5.794866000  | 0.811325000  |
| 1  | 4.668502000  | 7.682761000  | 2.357072000  |
| 1  | 5.103056000  | 6.098848000  | 3.013902000  |
| 1  | 6.351999000  | 7.138443000  | 2.287142000  |
| 1  | 4.440125000  | 8.058267000  | -0.125250000 |
| 1  | 4.930860000  | 6.807883000  | -1.276277000 |
| 1  | 6.160346000  | 7.670105000  | -0.326513000 |
| 7  | 4.354236000  | 2.201720000  | 0.750999000  |
| 6  | 3.094862000  | 1.453626000  | 0.658147000  |
| 6  | 2.437643000  | 1.556637000  | -0.738697000 |
| 6  | 1.923870000  | 2.942856000  | -1.074826000 |
| 6  | 0.708063000  | 3.397158000  | -0.532385000 |
| 6  | 0.252499000  | 4.696618000  | -0.779359000 |
| 6  | 1.004044000  | 5.566870000  | -1.582357000 |
| 6  | 2.200998000  | 5.114261000  | -2.150833000 |
| 6  | 2.656772000  | 3.813452000  | -1.898705000 |
| 1  | 5.054070000  | 2.008553000  | 0.047392000  |
| 1  | 2.427634000  | 1.854134000  | 1.423721000  |
| 1  | 3.158129000  | 1.223136000  | -1.498890000 |
| 1  | 1.612508000  | 0.832609000  | -0.761648000 |
| 1  | 0.111468000  | 2.728410000  | 0.084192000  |
| 1  | -0.676845000 | 5.036767000  | -0.332558000 |
| 1  | 0.663283000  | 6.586301000  | -1.731783000 |
| 1  | 2.781129000  | 5.774550000  | -2.788804000 |
| 1  | 3.585055000  | 3.469625000  | -2.349477000 |
| 6  | 0.780890000  | -0.774441000 | -4.760001000 |
| 6  | 0.040080000  | 0.563661000  | -4.545346000 |
| 6  | -1.444799000 | 0.399291000  | -4.177364000 |
| 6  | 0.996114000  | -1.582776000 | -3.468359000 |
| 1  | 0.215731000  | -1.384093000 | -5.481519000 |
| 1  | 0.554722000  | 1.136510000  | -3.759070000 |
| 1  | 0.116944000  | 1.168193000  | -5.460986000 |
| 1  | -1.999000000 | -0.080176000 | -4.994335000 |
| 1  | -1.578337000 | -0.227939000 | -3.288841000 |
| 1  | -1.910987000 | 1.373433000  | -3.984097000 |

|   |              |              |              |
|---|--------------|--------------|--------------|
| 1 | 1.530975000  | -2.518377000 | -3.673499000 |
| 1 | 0.049044000  | -1.844345000 | -2.984462000 |
| 1 | 1.596048000  | -1.006717000 | -2.749764000 |
| 6 | -0.347106000 | 9.223315000  | 1.781117000  |
| 6 | -0.053239000 | 8.002770000  | 2.696289000  |
| 6 | 1.065003000  | 7.100838000  | 2.139548000  |
| 6 | 1.320005000  | 5.815380000  | 2.939365000  |
| 7 | 0.153513000  | 4.909369000  | 2.884994000  |
| 6 | 0.143291000  | 3.670872000  | 3.391100000  |
| 7 | 1.294687000  | 3.078817000  | 3.801236000  |
| 7 | -1.017214000 | 2.998462000  | 3.511380000  |
| 6 | -0.850800000 | 8.813940000  | 0.402208000  |
| 8 | -0.032566000 | 8.556461000  | -0.528373000 |
| 1 | 0.577102000  | 9.788563000  | 1.618529000  |
| 1 | -0.974172000 | 7.423009000  | 2.820985000  |
| 1 | 0.234926000  | 8.374612000  | 3.690231000  |
| 1 | 0.850323000  | 6.840299000  | 1.098951000  |
| 1 | 2.006428000  | 7.667144000  | 2.120804000  |
| 1 | 2.197818000  | 5.311009000  | 2.522700000  |
| 1 | 1.541544000  | 6.049278000  | 3.991002000  |
| 1 | -0.713442000 | 5.247758000  | 2.425016000  |
| 1 | 2.213057000  | 3.349539000  | 3.442843000  |
| 1 | 1.243483000  | 2.230848000  | 4.342407000  |
| 1 | -1.932185000 | 3.412393000  | 3.250732000  |
| 1 | -1.017643000 | 2.002301000  | 3.672684000  |
| 7 | -2.191635000 | 8.709620000  | 0.209053000  |
| 6 | -2.725339000 | 8.229351000  | -1.086297000 |
| 6 | -4.242931000 | 8.437659000  | -0.948467000 |
| 6 | -4.497100000 | 8.241559000  | 0.563133000  |
| 6 | -3.253176000 | 8.860852000  | 1.233458000  |
| 1 | -2.470048000 | 7.170172000  | -1.215622000 |
| 1 | -4.516547000 | 9.455353000  | -1.255723000 |
| 1 | -4.812959000 | 7.736608000  | -1.565366000 |
| 1 | -5.424761000 | 8.711609000  | 0.904355000  |
| 1 | -4.541254000 | 7.173698000  | 0.804120000  |
| 1 | -2.989294000 | 8.328533000  | 2.149282000  |
| 1 | -3.408661000 | 9.923556000  | 1.468476000  |
| 6 | 2.124757000  | -3.151000000 | -8.043993000 |
| 6 | 0.729694000  | -3.488875000 | -8.523314000 |
| 6 | 0.313577000  | -4.823499000 | -8.669301000 |
| 6 | -0.975920000 | -5.132842000 | -9.121865000 |
| 6 | -1.872849000 | -4.107202000 | -9.440701000 |
| 6 | -1.470935000 | -2.771463000 | -9.299849000 |
| 6 | -0.184329000 | -2.467540000 | -8.842717000 |
| 1 | 2.096640000  | -2.508000000 | -7.155999000 |
| 1 | 2.688158000  | -4.053712000 | -7.787367000 |
| 1 | 1.008885000  | -5.625681000 | -8.436414000 |
| 1 | -1.275537000 | -6.170807000 | -9.228870000 |
| 1 | -2.869664000 | -4.344089000 | -9.798864000 |
| 1 | -2.156522000 | -1.967837000 | -9.552186000 |

|   |              |              |              |
|---|--------------|--------------|--------------|
| 1 | 0.117692000  | -1.429340000 | -8.735409000 |
| 6 | -4.395452000 | -3.809088000 | 1.252278000  |
| 6 | -3.285537000 | -4.593459000 | 0.983455000  |
| 6 | -2.571082000 | -5.367376000 | 1.973214000  |
| 6 | -1.508379000 | -5.949916000 | 1.341125000  |
| 6 | -1.560431000 | -5.543769000 | -0.045245000 |
| 7 | -2.658831000 | -4.724028000 | -0.247432000 |
| 6 | -0.637791000 | -5.916240000 | -1.010105000 |
| 6 | -0.691406000 | -5.537875000 | -2.340359000 |
| 6 | 0.239418000  | -5.979432000 | -3.356767000 |
| 6 | -0.179599000 | -5.450925000 | -4.544099000 |
| 6 | -1.369376000 | -4.674762000 | -4.268796000 |
| 7 | -1.658581000 | -4.728811000 | -2.915101000 |
| 6 | -2.102049000 | -4.000235000 | -5.230434000 |
| 6 | -3.241061000 | -3.255889000 | -4.968672000 |
| 6 | -3.967898000 | -2.500153000 | -5.963452000 |
| 6 | -4.984250000 | -1.854175000 | -5.317147000 |
| 6 | -4.896652000 | -2.209576000 | -3.918699000 |
| 7 | -3.834332000 | -3.084033000 | -3.726905000 |
| 6 | -5.745473000 | -1.733229000 | -2.932444000 |
| 6 | -5.664075000 | -2.065965000 | -1.589643000 |
| 6 | -6.600084000 | -1.634384000 | -0.575890000 |
| 6 | -6.225309000 | -2.225145000 | 0.598241000  |
| 6 | -5.053492000 | -3.024331000 | 0.320406000  |
| 7 | -4.711206000 | -2.897584000 | -1.018933000 |
| 1 | -4.768534000 | -3.799664000 | 2.269809000  |
| 1 | 0.175329000  | -6.564755000 | -0.703492000 |
| 1 | -1.755342000 | -4.047532000 | -6.256349000 |
| 1 | -6.541207000 | -1.062307000 | -3.236334000 |
| 8 | -3.445143000 | 3.947859000  | 2.560956000  |
| 6 | -3.274438000 | 5.006208000  | 1.885108000  |
| 8 | -2.237951000 | 5.712441000  | 1.662729000  |
| 6 | -1.916649000 | -0.021564000 | 0.839599000  |
| 6 | -2.624510000 | 0.715472000  | -0.048067000 |
| 6 | -3.965664000 | 1.372503000  | 0.137468000  |
| 1 | -0.986109000 | -0.460182000 | 0.477835000  |
| 1 | -2.174281000 | 0.846713000  | -1.031662000 |
| 1 | -2.514594000 | -1.722767000 | -1.031136000 |
| 1 | -3.873524000 | 2.364623000  | 0.599865000  |
| 1 | -4.627053000 | 0.779160000  | 0.778273000  |
| 8 | -2.128585000 | -2.386646000 | -1.646483000 |
| 1 | 2.691760000  | -2.613492000 | -8.814878000 |
| 1 | 1.757828000  | -0.568052000 | -5.223888000 |
| 1 | -2.271537000 | 8.788667000  | -1.908371000 |
| 1 | -1.060622000 | 9.887581000  | 2.281266000  |
| 1 | 6.741812000  | 3.096719000  | 1.235105000  |
| 1 | 3.286636000  | 0.398121000  | 0.894837000  |
| 1 | -6.691321000 | -2.142496000 | 1.569093000  |
| 1 | -2.855966000 | -5.438628000 | 3.012632000  |
| 1 | -5.727455000 | -1.188856000 | -5.731904000 |

|   |              |              |              |
|---|--------------|--------------|--------------|
| 1 | -7.435163000 | -0.973588000 | -0.756843000 |
| 1 | -0.751018000 | -6.596633000 | 1.759759000  |
| 1 | 1.089304000  | -6.619400000 | -3.169080000 |
| 1 | -3.706832000 | -2.471292000 | -7.010960000 |
| 1 | 0.254822000  | -5.564661000 | -5.526309000 |
| 6 | -2.229703000 | -0.359137000 | 2.241070000  |
| 6 | -1.627687000 | -1.508922000 | 2.802210000  |
| 6 | -3.067406000 | 0.421282000  | 3.072556000  |
| 6 | -1.870415000 | -1.883913000 | 4.125378000  |
| 1 | -0.977865000 | -2.118389000 | 2.180490000  |
| 6 | -3.304033000 | 0.044071000  | 4.400652000  |
| 1 | -3.508948000 | 1.338662000  | 2.701733000  |
| 6 | -2.714191000 | -1.109305000 | 4.932376000  |
| 1 | -1.401410000 | -2.777671000 | 4.526035000  |
| 1 | -3.947565000 | 0.661356000  | 5.020004000  |
| 1 | -2.902896000 | -1.395940000 | 5.962300000  |
| 1 | -4.460221000 | 1.503691000  | -0.830552000 |

<sup>4</sup>TS<sub>gamma,HA,S2</sub>

|    |              |              |              |
|----|--------------|--------------|--------------|
| 26 | -5.060478000 | -2.040480000 | -1.897327000 |
| 16 | -6.090882000 | -4.262334000 | -2.370308000 |
| 1  | -7.243066000 | -3.826630000 | -2.997930000 |
| 6  | 5.598159000  | 5.965800000  | 1.434993000  |
| 6  | 5.750115000  | 4.562547000  | 0.787368000  |
| 6  | 4.442282000  | 3.983411000  | 0.195056000  |
| 6  | 4.038316000  | 4.704010000  | -1.106777000 |
| 6  | 4.569137000  | 2.468413000  | -0.054515000 |
| 6  | 4.777031000  | 5.955679000  | 2.715868000  |
| 8  | 3.648458000  | 6.515579000  | 2.797062000  |
| 1  | 5.108247000  | 6.657366000  | 0.745895000  |
| 1  | 6.506917000  | 4.627091000  | -0.007434000 |
| 1  | 6.146631000  | 3.860081000  | 1.534804000  |
| 1  | 3.638164000  | 4.125158000  | 0.932306000  |
| 1  | 3.076163000  | 4.327171000  | -1.469672000 |
| 1  | 3.946367000  | 5.788996000  | -0.974626000 |
| 1  | 4.787951000  | 4.526865000  | -1.890189000 |
| 1  | 3.612945000  | 2.067486000  | -0.406545000 |
| 1  | 4.840416000  | 1.934452000  | 0.863664000  |
| 1  | 5.335526000  | 2.257516000  | -0.813347000 |
| 7  | 5.339954000  | 5.299859000  | 3.769397000  |
| 6  | 4.682246000  | 5.106129000  | 5.064375000  |
| 6  | 5.036545000  | 3.743268000  | 5.690750000  |
| 6  | 4.650484000  | 2.531287000  | 4.856714000  |
| 6  | 3.344757000  | 2.377003000  | 4.358049000  |
| 6  | 2.984109000  | 1.253500000  | 3.607854000  |
| 6  | 3.931032000  | 0.252546000  | 3.350498000  |
| 6  | 5.234214000  | 0.391450000  | 3.840332000  |
| 6  | 5.590549000  | 1.524402000  | 4.583741000  |
| 1  | 6.238518000  | 4.858206000  | 3.633115000  |

|   |              |              |              |
|---|--------------|--------------|--------------|
| 1 | 3.606535000  | 5.190918000  | 4.895421000  |
| 1 | 6.114964000  | 3.710911000  | 5.900770000  |
| 1 | 4.541596000  | 3.700480000  | 6.672109000  |
| 1 | 2.602087000  | 3.146364000  | 4.547172000  |
| 1 | 1.976020000  | 1.161781000  | 3.215326000  |
| 1 | 3.649239000  | -0.620856000 | 2.771730000  |
| 1 | 5.974805000  | -0.377724000 | 3.643352000  |
| 1 | 6.604991000  | 1.622827000  | 4.962836000  |
| 6 | 2.414515000  | 2.171328000  | -4.424927000 |
| 6 | 1.306569000  | 3.068931000  | -3.832949000 |
| 6 | -0.034632000 | 3.002347000  | -4.583667000 |
| 6 | 2.124116000  | 0.663614000  | -4.331213000 |
| 1 | 2.573958000  | 2.445197000  | -5.479479000 |
| 1 | 1.149557000  | 2.810775000  | -2.775143000 |
| 1 | 1.660306000  | 4.110163000  | -3.843285000 |
| 1 | 0.101829000  | 3.244740000  | -5.647751000 |
| 1 | -0.484100000 | 2.002489000  | -4.523529000 |
| 1 | -0.747693000 | 3.719251000  | -4.162716000 |
| 1 | 2.952484000  | 0.072694000  | -4.741980000 |
| 1 | 1.214394000  | 0.392287000  | -4.880023000 |
| 1 | 1.980527000  | 0.358562000  | -3.286587000 |
| 6 | -2.472179000 | 6.802793000  | -1.004943000 |
| 6 | -1.435961000 | 6.559511000  | 0.122404000  |
| 6 | -0.004840000 | 6.316918000  | -0.390357000 |
| 6 | 1.016319000  | 6.137129000  | 0.747081000  |
| 7 | 0.772503000  | 4.882384000  | 1.481150000  |
| 6 | 0.619479000  | 4.778699000  | 2.801858000  |
| 7 | 1.030005000  | 5.784825000  | 3.630350000  |
| 7 | 0.051988000  | 3.671215000  | 3.320732000  |
| 6 | -2.640191000 | 5.601367000  | -1.926193000 |
| 8 | -1.906500000 | 5.471927000  | -2.945016000 |
| 1 | -2.130510000 | 7.629338000  | -1.636704000 |
| 1 | -1.751007000 | 5.705836000  | 0.737645000  |
| 1 | -1.437815000 | 7.439157000  | 0.783253000  |
| 1 | 0.017432000  | 5.443550000  | -1.052615000 |
| 1 | 0.314718000  | 7.173128000  | -1.000613000 |
| 1 | 2.033545000  | 6.129092000  | 0.346317000  |
| 1 | 0.954005000  | 6.974470000  | 1.448322000  |
| 1 | 0.708653000  | 3.995392000  | 0.906375000  |
| 1 | 1.871477000  | 6.309815000  | 3.388321000  |
| 1 | 0.686845000  | 5.826109000  | 4.576038000  |
| 1 | -0.211192000 | 2.859827000  | 2.696441000  |
| 1 | 0.139059000  | 3.490389000  | 4.309085000  |
| 7 | -3.575082000 | 4.666494000  | -1.598579000 |
| 6 | -3.776628000 | 3.462733000  | -2.446093000 |
| 6 | -5.058645000 | 2.822035000  | -1.886068000 |
| 6 | -5.068892000 | 3.262081000  | -0.404910000 |
| 6 | -4.489989000 | 4.690368000  | -0.432875000 |
| 1 | -2.910941000 | 2.795491000  | -2.352166000 |
| 1 | -5.940180000 | 3.220297000  | -2.405431000 |

|   |              |              |              |
|---|--------------|--------------|--------------|
| 1 | -5.050352000 | 1.732789000  | -1.984684000 |
| 1 | -6.065724000 | 3.229200000  | 0.045260000  |
| 1 | -4.415983000 | 2.603496000  | 0.179764000  |
| 1 | -3.953437000 | 4.940274000  | 0.487390000  |
| 1 | -5.283785000 | 5.437826000  | -0.579359000 |
| 6 | 0.016388000  | -3.633568000 | -8.163350000 |
| 6 | -0.725299000 | -2.315265000 | -8.228721000 |
| 6 | -1.906048000 | -2.194695000 | -8.984911000 |
| 6 | -2.586302000 | -0.975020000 | -9.064907000 |
| 6 | -2.101210000 | 0.149582000  | -8.382129000 |
| 6 | -0.931270000 | 0.042910000  | -7.621852000 |
| 6 | -0.250574000 | -1.179764000 | -7.549526000 |
| 1 | 0.861582000  | -3.581495000 | -7.469663000 |
| 1 | -0.640053000 | -4.448213000 | -7.833650000 |
| 1 | -2.290103000 | -3.061429000 | -9.516369000 |
| 1 | -3.490071000 | -0.900577000 | -9.662647000 |
| 1 | -2.625770000 | 1.097681000  | -8.445816000 |
| 1 | -0.547957000 | 0.906057000  | -7.086808000 |
| 1 | 0.663479000  | -1.250635000 | -6.966061000 |
| 6 | -6.679431000 | -2.310018000 | 1.105112000  |
| 6 | -5.406878000 | -2.862118000 | 1.027781000  |
| 6 | -4.732468000 | -3.538738000 | 2.117216000  |
| 6 | -3.539579000 | -3.990263000 | 1.630342000  |
| 6 | -3.468319000 | -3.584333000 | 0.242311000  |
| 7 | -4.619453000 | -2.890708000 | -0.109262000 |
| 6 | -2.394803000 | -3.822576000 | -0.601277000 |
| 6 | -2.301463000 | -3.391931000 | -1.921030000 |
| 6 | -1.149293000 | -3.592523000 | -2.773826000 |
| 6 | -1.433370000 | -2.995765000 | -3.970478000 |
| 6 | -2.763562000 | -2.435599000 | -3.856892000 |
| 7 | -3.276529000 | -2.683808000 | -2.597462000 |
| 6 | -3.425421000 | -1.770252000 | -4.883598000 |
| 6 | -4.715938000 | -1.266400000 | -4.820423000 |
| 6 | -5.400286000 | -0.620705000 | -5.922852000 |
| 6 | -6.652406000 | -0.301293000 | -5.481865000 |
| 6 | -6.739378000 | -0.743871000 | -4.104486000 |
| 7 | -5.550833000 | -1.330226000 | -3.716672000 |
| 6 | -7.855019000 | -0.594653000 | -3.287048000 |
| 6 | -7.933927000 | -0.988908000 | -1.961316000 |
| 6 | -9.076695000 | -0.780390000 | -1.098769000 |
| 6 | -8.735910000 | -1.243113000 | 0.139764000  |
| 6 | -7.383934000 | -1.752141000 | 0.050512000  |
| 7 | -6.908012000 | -1.601635000 | -1.247775000 |
| 1 | -7.181128000 | -2.354343000 | 2.066443000  |
| 1 | -1.543837000 | -4.355470000 | -0.190613000 |
| 1 | -2.890552000 | -1.648780000 | -5.819901000 |
| 1 | -8.728084000 | -0.114649000 | -3.717296000 |
| 8 | -0.299821000 | 1.517363000  | 1.763571000  |
| 6 | 0.236459000  | 1.546652000  | 0.586856000  |
| 8 | 0.751943000  | 2.600260000  | 0.052134000  |

|   |               |              |              |
|---|---------------|--------------|--------------|
| 6 | 0.207707000   | 0.282715000  | -0.279156000 |
| 6 | -1.225542000  | 0.127397000  | -0.932858000 |
| 6 | -2.354023000  | -0.127917000 | 0.033529000  |
| 1 | 0.883081000   | 0.490715000  | -1.115601000 |
| 1 | -1.415541000  | 1.044155000  | -1.505152000 |
| 1 | -1.152509000  | -0.696215000 | -1.653400000 |
| 1 | -2.673876000  | 0.722518000  | 0.636760000  |
| 1 | -2.298836000  | -1.055119000 | 0.603466000  |
| 8 | -4.411191000  | -0.433551000 | -1.449596000 |
| 1 | 0.412840000   | -3.917457000 | -9.146823000 |
| 1 | 3.360357000   | 2.382830000  | -3.905125000 |
| 1 | -3.850099000  | 3.757264000  | -3.496503000 |
| 1 | -3.430049000  | 7.097465000  | -0.560794000 |
| 1 | 6.594009000   | 6.374748000  | 1.656837000  |
| 1 | 4.965464000   | 5.910132000  | 5.758144000  |
| 1 | -9.333745000  | -1.249235000 | 1.039570000  |
| 1 | -5.137016000  | -3.654328000 | 3.112183000  |
| 1 | -7.450190000  | 0.187232000  | -6.022288000 |
| 1 | -10.007213000 | -0.329859000 | -1.412364000 |
| 1 | -2.767679000  | -4.540856000 | 2.147498000  |
| 1 | -0.248346000  | -4.106597000 | -2.473831000 |
| 1 | -4.961391000  | -0.449303000 | -6.894572000 |
| 1 | -0.817588000  | -2.928660000 | -4.855150000 |
| 6 | 0.676570000   | -1.002930000 | 0.388349000  |
| 6 | 1.479033000   | -1.889519000 | -0.355354000 |
| 6 | 0.312586000   | -1.376088000 | 1.697126000  |
| 6 | 1.903525000   | -3.110585000 | 0.180371000  |
| 1 | 1.774703000   | -1.615558000 | -1.364760000 |
| 6 | 0.740355000   | -2.596474000 | 2.235835000  |
| 1 | -0.284067000  | -0.688411000 | 2.283002000  |
| 6 | 1.533339000   | -3.471046000 | 1.482043000  |
| 1 | 2.529185000   | -3.772415000 | -0.411967000 |
| 1 | 0.454035000   | -2.862429000 | 3.249624000  |
| 1 | 1.864925000   | -4.414893000 | 1.904940000  |
| 1 | -3.497443000  | -0.354357000 | -0.768727000 |

<sup>4</sup>IM1<sub>gamma,HA,S2</sub>

|    |              |              |              |
|----|--------------|--------------|--------------|
| 26 | -5.334257000 | -2.162898000 | -2.137349000 |
| 16 | -6.052157000 | -4.454404000 | -2.704202000 |
| 1  | -7.094648000 | -4.140409000 | -3.555812000 |
| 6  | 5.770066000  | 6.164019000  | 1.303814000  |
| 6  | 5.911838000  | 4.765743000  | 0.643053000  |
| 6  | 4.585524000  | 4.170916000  | 0.110002000  |
| 6  | 4.109145000  | 4.897259000  | -1.163846000 |
| 6  | 4.721977000  | 2.659957000  | -0.158785000 |
| 6  | 4.993288000  | 6.135741000  | 2.611612000  |
| 8  | 3.857340000  | 6.673775000  | 2.731492000  |
| 1  | 5.249837000  | 6.855003000  | 0.636757000  |
| 1  | 6.629911000  | 4.844429000  | -0.185651000 |

|   |              |              |              |
|---|--------------|--------------|--------------|
| 1 | 6.352189000  | 4.066137000  | 1.368138000  |
| 1 | 3.817421000  | 4.293275000  | 0.888305000  |
| 1 | 3.142390000  | 4.501746000  | -1.493219000 |
| 1 | 3.995950000  | 5.977809000  | -1.013746000 |
| 1 | 4.829425000  | 4.748083000  | -1.979884000 |
| 1 | 3.753252000  | 2.244347000  | -0.455856000 |
| 1 | 5.055675000  | 2.125091000  | 0.737943000  |
| 1 | 5.445583000  | 2.466610000  | -0.962897000 |
| 7 | 5.601890000  | 5.485994000  | 3.642785000  |
| 6 | 4.988644000  | 5.273218000  | 4.956518000  |
| 6 | 5.431046000  | 3.936297000  | 5.583941000  |
| 6 | 5.078412000  | 2.702926000  | 4.767480000  |
| 6 | 3.750838000  | 2.446303000  | 4.381890000  |
| 6 | 3.418329000  | 1.310211000  | 3.638145000  |
| 6 | 4.420023000  | 0.399671000  | 3.273691000  |
| 6 | 5.745550000  | 0.638928000  | 3.652220000  |
| 6 | 6.071315000  | 1.784415000  | 4.390656000  |
| 1 | 6.503361000  | 5.061345000  | 3.475391000  |
| 1 | 3.905291000  | 5.296695000  | 4.816613000  |
| 1 | 6.515635000  | 3.959840000  | 5.760035000  |
| 1 | 4.968246000  | 3.877031000  | 6.579637000  |
| 1 | 2.967309000  | 3.145904000  | 4.656696000  |
| 1 | 2.389183000  | 1.141088000  | 3.335962000  |
| 1 | 4.163828000  | -0.483488000 | 2.697806000  |
| 1 | 6.526499000  | -0.061956000 | 3.373368000  |
| 1 | 7.103193000  | 1.960228000  | 4.685309000  |
| 6 | 2.456444000  | 1.910414000  | -4.213474000 |
| 6 | 1.386150000  | 2.866003000  | -3.643662000 |
| 6 | 0.035847000  | 2.818494000  | -4.378928000 |
| 6 | 2.110428000  | 0.418187000  | -4.071184000 |
| 1 | 2.619464000  | 2.145362000  | -5.276850000 |
| 1 | 1.232785000  | 2.651274000  | -2.575602000 |
| 1 | 1.775086000  | 3.893419000  | -3.694214000 |
| 1 | 0.168681000  | 3.029659000  | -5.450233000 |
| 1 | -0.440027000 | 1.833326000  | -4.289259000 |
| 1 | -0.653620000 | 3.564780000  | -3.970121000 |
| 1 | 2.917415000  | -0.216162000 | -4.459047000 |
| 1 | 1.192425000  | 0.162162000  | -4.613615000 |
| 1 | 1.953296000  | 0.154545000  | -3.017193000 |
| 6 | -2.410213000 | 6.657876000  | -0.858262000 |
| 6 | -1.361486000 | 6.415967000  | 0.257998000  |
| 6 | 0.071932000  | 6.217374000  | -0.268438000 |
| 6 | 1.120075000  | 6.134826000  | 0.854973000  |
| 7 | 0.954156000  | 4.901751000  | 1.645521000  |
| 6 | 0.884088000  | 4.845725000  | 2.976003000  |
| 7 | 1.308347000  | 5.898073000  | 3.738012000  |
| 7 | 0.387382000  | 3.742502000  | 3.570916000  |
| 6 | -2.580543000 | 5.465517000  | -1.790657000 |
| 8 | -1.811577000 | 5.317656000  | -2.780764000 |
| 1 | -2.078922000 | 7.493010000  | -1.484952000 |



|   |              |              |              |
|---|--------------|--------------|--------------|
| 1 | -1.654615000 | 5.546743000  | 0.862422000  |
| 1 | -1.379146000 | 7.285572000  | 0.931945000  |
| 1 | 0.123947000  | 5.320729000  | -0.896675000 |
| 1 | 0.341062000  | 7.062364000  | -0.917257000 |
| 1 | 2.129509000  | 6.164377000  | 0.435499000  |
| 1 | 1.025526000  | 6.995589000  | 1.524294000  |
| 1 | 0.882674000  | 3.992309000  | 1.107693000  |
| 1 | 2.118184000  | 6.436384000  | 3.426799000  |
| 1 | 1.021945000  | 5.966640000  | 4.700931000  |
| 1 | 0.117027000  | 2.897574000  | 2.996070000  |
| 1 | 0.530784000  | 3.609233000  | 4.560145000  |
| 7 | -3.563407000 | 4.565088000  | -1.510407000 |
| 6 | -3.798276000 | 3.391006000  | -2.391006000 |
| 6 | -5.157233000 | 2.842597000  | -1.922755000 |
| 6 | -5.208839000 | 3.236974000  | -0.429556000 |
| 6 | -4.521007000 | 4.616065000  | -0.379353000 |
| 1 | -2.993805000 | 2.657044000  | -2.255768000 |
| 1 | -5.971826000 | 3.334007000  | -2.470991000 |
| 1 | -5.240275000 | 1.760005000  | -2.060981000 |
| 1 | -6.226702000 | 3.268647000  | -0.029456000 |
| 1 | -4.640160000 | 2.510205000  | 0.162526000  |
| 1 | -4.003761000 | 4.790693000  | 0.569563000  |
| 1 | -5.249141000 | 5.427304000  | -0.525380000 |
| 6 | -0.133353000 | -3.556300000 | -8.079607000 |
| 6 | -0.804844000 | -2.205812000 | -8.208292000 |
| 6 | -1.963239000 | -2.049221000 | -8.989591000 |
| 6 | -2.599607000 | -0.806432000 | -9.091908000 |
| 6 | -2.089237000 | 0.305140000  | -8.408572000 |
| 6 | -0.935493000 | 0.164462000  | -7.627451000 |
| 6 | -0.298906000 | -1.079329000 | -7.533775000 |
| 1 | 0.941457000  | -3.453119000 | -7.895850000 |
| 1 | -0.554522000 | -4.133014000 | -7.244523000 |
| 1 | -2.364568000 | -2.905692000 | -9.524459000 |
| 1 | -3.485654000 | -0.704806000 | -9.711810000 |
| 1 | -2.578035000 | 1.270754000  | -8.489847000 |
| 1 | -0.530280000 | 1.019699000  | -7.095969000 |
| 1 | 0.606399000  | -1.174539000 | -6.939617000 |
| 6 | -7.116896000 | -2.646067000 | 0.738155000  |
| 6 | -5.780833000 | -3.027447000 | 0.752185000  |
| 6 | -5.103247000 | -3.612556000 | 1.890937000  |
| 6 | -3.827774000 | -3.898912000 | 1.495924000  |
| 6 | -3.709421000 | -3.482439000 | 0.114984000  |
| 7 | -4.914495000 | -2.945630000 | -0.325147000 |
| 6 | -2.556200000 | -3.577472000 | -0.648513000 |
| 6 | -2.426125000 | -3.130164000 | -1.960685000 |
| 6 | -1.205233000 | -3.185152000 | -2.735948000 |
| 6 | -1.481733000 | -2.619767000 | -3.949937000 |
| 6 | -2.874546000 | -2.225232000 | -3.924613000 |
| 7 | -3.433495000 | -2.539167000 | -2.699097000 |
| 6 | -3.544569000 | -1.642783000 | -4.995498000 |

|   |               |              |              |
|---|---------------|--------------|--------------|
| 6 | -4.890153000  | -1.302565000 | -5.024687000 |
| 6 | -5.564031000  | -0.713972000 | -6.165077000 |
| 6 | -6.872343000  | -0.547774000 | -5.810080000 |
| 6 | -7.002799000  | -1.030059000 | -4.449477000 |
| 7 | -5.787425000  | -1.489992000 | -3.988341000 |
| 6 | -8.183118000  | -1.023182000 | -3.710879000 |
| 6 | -8.309797000  | -1.446818000 | -2.398446000 |
| 6 | -9.528874000  | -1.391291000 | -1.618997000 |
| 6 | -9.222475000  | -1.830469000 | -0.363531000 |
| 6 | -7.813937000  | -2.169469000 | -0.361183000 |
| 7 | -7.271056000  | -1.944338000 | -1.618576000 |
| 1 | -7.673304000  | -2.764671000 | 1.662453000  |
| 1 | -1.676467000  | -4.003341000 | -0.177358000 |
| 1 | -2.965301000  | -1.447233000 | -5.891976000 |
| 1 | -9.072832000  | -0.636992000 | -4.197905000 |
| 8 | -0.002006000  | 1.524865000  | 2.115654000  |
| 6 | 0.421062000   | 1.533981000  | 0.895203000  |
| 8 | 0.892010000   | 2.574225000  | 0.295870000  |
| 6 | 0.282091000   | 0.268537000  | 0.043023000  |
| 6 | -1.170731000  | 0.274060000  | -0.609837000 |
| 6 | -2.299857000  | 0.164906000  | 0.357567000  |
| 1 | 0.973063000   | 0.400153000  | -0.795938000 |
| 1 | -1.241988000  | 1.205621000  | -1.184773000 |
| 1 | -1.190106000  | -0.560319000 | -1.321863000 |
| 1 | -2.703870000  | 1.053255000  | 0.832889000  |
| 1 | -2.546844000  | -0.791478000 | 0.808132000  |
| 8 | -4.932261000  | -0.453717000 | -1.638612000 |
| 1 | -0.265425000  | -4.156603000 | -8.986071000 |
| 1 | 3.412668000   | 2.102520000  | -3.705277000 |
| 1 | -3.781295000  | 3.706730000  | -3.437385000 |
| 1 | -3.364743000  | 6.944261000  | -0.402905000 |
| 1 | 6.769373000   | 6.580584000  | 1.493198000  |
| 1 | 5.247018000   | 6.098561000  | 5.634792000  |
| 1 | -9.876271000  | -1.922769000 | 0.491527000  |
| 1 | -5.560042000  | -3.784129000 | 2.854714000  |
| 1 | -7.680766000  | -0.138342000 | -6.398271000 |
| 1 | -10.482557000 | -1.050295000 | -1.994952000 |
| 1 | -3.028233000  | -4.341340000 | 2.071558000  |
| 1 | -0.270698000  | -3.589018000 | -2.376491000 |
| 1 | -5.080805000  | -0.471542000 | -7.099888000 |
| 1 | -0.821742000  | -2.473225000 | -4.792010000 |
| 6 | 0.601280000   | -1.056213000 | 0.714786000  |
| 6 | 1.371633000   | -1.999974000 | 0.007970000  |
| 6 | 0.118531000   | -1.414972000 | 1.988894000  |
| 6 | 1.644963000   | -3.264625000 | 0.542652000  |
| 1 | 1.762255000   | -1.736311000 | -0.971762000 |
| 6 | 0.392293000   | -2.679256000 | 2.525117000  |
| 1 | -0.440485000  | -0.681740000 | 2.555098000  |
| 6 | 1.150582000   | -3.612002000 | 1.805965000  |
| 1 | 2.248813000   | -3.970925000 | -0.020226000 |

|   |              |              |              |
|---|--------------|--------------|--------------|
| 1 | 0.016698000  | -2.933272000 | 3.512490000  |
| 1 | 1.363481000  | -4.589794000 | 2.227978000  |
| 1 | -4.133838000 | -0.416144000 | -1.061658000 |

<sup>4</sup>Pr<sub>gamma,OH,S2</sub>

|    |              |              |              |
|----|--------------|--------------|--------------|
| 26 | -5.241464000 | -2.228926000 | -2.359241000 |
| 16 | -6.177554000 | -4.398254000 | -3.033655000 |
| 1  | -5.162120000 | -4.756434000 | -3.900587000 |
| 6  | 5.736297000  | 6.174807000  | 1.215671000  |
| 6  | 5.871054000  | 4.730733000  | 0.659313000  |
| 6  | 4.540661000  | 4.101334000  | 0.178215000  |
| 6  | 4.057970000  | 4.734756000  | -1.142133000 |
| 6  | 4.673976000  | 2.574624000  | 0.019202000  |
| 6  | 4.969868000  | 6.239747000  | 2.527837000  |
| 8  | 3.816279000  | 6.745763000  | 2.610500000  |
| 1  | 5.211202000  | 6.814837000  | 0.503181000  |
| 1  | 6.584782000  | 4.746630000  | -0.176803000 |
| 1  | 6.313862000  | 4.086338000  | 1.432356000  |
| 1  | 3.777361000  | 4.282035000  | 0.949667000  |
| 1  | 3.092856000  | 4.311850000  | -1.440750000 |
| 1  | 3.938646000  | 5.822446000  | -1.067165000 |
| 1  | 4.777048000  | 4.532603000  | -1.947737000 |
| 1  | 3.703777000  | 2.139312000  | -0.243093000 |
| 1  | 5.010528000  | 2.105811000  | 0.951214000  |
| 1  | 5.394522000  | 2.323251000  | -0.771471000 |
| 7  | 5.607607000  | 5.702782000  | 3.605866000  |
| 6  | 5.008039000  | 5.571881000  | 4.936371000  |
| 6  | 5.461712000  | 4.279908000  | 5.645101000  |
| 6  | 5.107453000  | 2.993081000  | 4.916462000  |
| 6  | 3.779865000  | 2.711440000  | 4.548819000  |
| 6  | 3.446561000  | 1.524721000  | 3.888910000  |
| 6  | 4.447314000  | 0.589323000  | 3.591547000  |
| 6  | 5.772987000  | 0.853698000  | 3.952260000  |
| 6  | 6.099518000  | 2.048814000  | 4.606618000  |
| 1  | 6.525470000  | 5.303520000  | 3.467632000  |
| 1  | 3.923797000  | 5.583503000  | 4.803020000  |
| 1  | 6.547858000  | 4.318972000  | 5.808463000  |
| 1  | 5.009301000  | 4.284523000  | 6.647422000  |
| 1  | 2.997287000  | 3.430622000  | 4.770230000  |
| 1  | 2.417292000  | 1.334168000  | 3.600155000  |
| 1  | 4.190894000  | -0.332959000 | 3.080875000  |
| 1  | 6.553265000  | 0.133914000  | 3.724470000  |
| 1  | 7.131554000  | 2.244417000  | 4.887784000  |
| 6  | 2.498186000  | 1.357782000  | -3.909493000 |
| 6  | 1.435198000  | 2.373567000  | -3.438615000 |
| 6  | 0.099531000  | 2.293466000  | -4.197173000 |
| 6  | 2.135499000  | -0.110411000 | -3.626931000 |
| 1  | 2.668598000  | 1.489855000  | -4.989481000 |
| 1  | 1.255618000  | 2.245193000  | -2.360907000 |

|   |              |              |              |
|---|--------------|--------------|--------------|
| 1 | 1.844034000  | 3.387320000  | -3.559253000 |
| 1 | 0.256595000  | 2.441614000  | -5.275893000 |
| 1 | -0.387592000 | 1.319205000  | -4.061450000 |
| 1 | -0.590426000 | 3.068008000  | -3.845749000 |
| 1 | 2.930275000  | -0.788606000 | -3.962273000 |
| 1 | 1.208588000  | -0.404793000 | -4.132860000 |
| 1 | 1.989556000  | -0.271157000 | -2.550711000 |
| 6 | -2.477883000 | 6.316725000  | -0.960264000 |
| 6 | -1.436347000 | 6.135852000  | 0.174278000  |
| 6 | 0.011757000  | 5.978147000  | -0.326334000 |
| 6 | 1.049702000  | 6.023090000  | 0.808840000  |
| 7 | 0.921638000  | 4.848996000  | 1.691033000  |
| 6 | 0.868328000  | 4.893382000  | 3.022786000  |
| 7 | 1.289345000  | 6.005218000  | 3.696197000  |
| 7 | 0.391660000  | 3.833685000  | 3.706060000  |
| 6 | -2.605022000 | 5.094235000  | -1.859599000 |
| 8 | -1.751624000 | 4.885305000  | -2.767119000 |
| 1 | -2.159603000 | 7.143289000  | -1.605960000 |
| 1 | -1.709494000 | 5.270979000  | 0.793944000  |
| 1 | -1.495576000 | 7.019755000  | 0.827235000  |
| 1 | 0.114664000  | 5.048460000  | -0.896744000 |
| 1 | 0.245859000  | 6.793062000  | -1.025253000 |
| 1 | 2.062108000  | 6.061923000  | 0.396835000  |
| 1 | 0.911958000  | 6.927251000  | 1.410538000  |
| 1 | 0.859038000  | 3.901878000  | 1.224007000  |
| 1 | 2.085350000  | 6.530600000  | 3.332036000  |
| 1 | 1.009341000  | 6.148526000  | 4.652704000  |
| 1 | 0.102088000  | 2.954865000  | 3.196719000  |
| 1 | 0.549462000  | 3.773959000  | 4.700123000  |
| 7 | -3.645023000 | 4.241453000  | -1.646579000 |
| 6 | -3.847303000 | 3.050095000  | -2.509760000 |
| 6 | -5.310501000 | 2.663003000  | -2.243746000 |
| 6 | -5.514870000 | 3.059360000  | -0.764244000 |
| 6 | -4.705401000 | 4.365625000  | -0.614758000 |
| 1 | -3.167434000 | 2.246116000  | -2.205361000 |
| 1 | -5.981423000 | 3.235772000  | -2.897677000 |
| 1 | -5.490195000 | 1.598732000  | -2.414906000 |
| 1 | -6.567424000 | 3.200799000  | -0.498729000 |
| 1 | -5.093501000 | 2.273108000  | -0.129821000 |
| 1 | -4.273107000 | 4.470848000  | 0.386059000  |
| 1 | -5.329613000 | 5.248843000  | -0.812043000 |
| 6 | -0.757930000 | -3.423264000 | -9.303742000 |
| 6 | -1.198165000 | -2.007994000 | -8.996887000 |
| 6 | -2.358510000 | -1.470632000 | -9.581156000 |
| 6 | -2.778132000 | -0.168654000 | -9.281886000 |
| 6 | -2.044665000 | 0.620304000  | -8.386380000 |
| 6 | -0.885869000 | 0.098715000  | -7.797833000 |
| 6 | -0.467017000 | -1.201575000 | -8.105356000 |
| 1 | 0.330221000  | -3.527760000 | -9.234911000 |
| 1 | -1.199916000 | -4.140716000 | -8.598778000 |

|   |              |              |               |
|---|--------------|--------------|---------------|
| 1 | -2.931912000 | -2.074356000 | -10.279330000 |
| 1 | -3.668978000 | 0.232287000  | -9.756779000  |
| 1 | -2.365741000 | 1.630744000  | -8.155037000  |
| 1 | -0.309693000 | 0.703137000  | -7.104394000  |
| 1 | 0.443866000  | -1.592052000 | -7.658547000  |
| 6 | -6.695765000 | -2.376853000 | 0.767906000   |
| 6 | -5.388426000 | -2.814192000 | 0.654564000   |
| 6 | -4.634360000 | -3.432900000 | 1.716594000   |
| 6 | -3.406866000 | -3.757153000 | 1.208935000   |
| 6 | -3.394783000 | -3.343019000 | -0.172462000  |
| 7 | -4.610023000 | -2.737696000 | -0.502088000  |
| 6 | -2.331049000 | -3.527475000 | -1.037223000  |
| 6 | -2.318839000 | -3.127659000 | -2.364141000  |
| 6 | -1.182546000 | -3.257806000 | -3.242365000  |
| 6 | -1.532679000 | -2.702512000 | -4.442432000  |
| 6 | -2.888359000 | -2.229354000 | -4.313320000  |
| 7 | -3.369609000 | -2.502259000 | -3.033784000  |
| 6 | -3.587893000 | -1.581539000 | -5.317846000  |
| 6 | -4.881227000 | -1.107194000 | -5.187459000  |
| 6 | -5.615909000 | -0.445611000 | -6.239897000  |
| 6 | -6.856141000 | -0.158035000 | -5.744620000  |
| 6 | -6.892563000 | -0.636937000 | -4.382466000  |
| 7 | -5.670514000 | -1.211296000 | -4.045964000  |
| 6 | -7.987552000 | -0.531277000 | -3.542716000  |
| 6 | -8.015697000 | -0.963627000 | -2.227875000  |
| 6 | -9.144668000 | -0.810674000 | -1.343185000  |
| 6 | -8.779236000 | -1.323698000 | -0.129952000  |
| 6 | -7.423286000 | -1.798438000 | -0.258977000  |
| 7 | -6.962038000 | -1.576180000 | -1.553719000  |
| 1 | -7.185170000 | -2.493727000 | 1.728289000   |
| 1 | -1.434869000 | -3.989332000 | -0.639693000  |
| 1 | -3.085263000 | -1.428221000 | -6.265772000  |
| 1 | -8.883091000 | -0.065343000 | -3.938539000  |
| 8 | -0.071620000 | 1.538559000  | 2.398296000   |
| 6 | 0.338918000  | 1.450566000  | 1.174412000   |
| 8 | 0.860753000  | 2.424649000  | 0.513527000   |
| 6 | 0.116594000  | 0.143891000  | 0.399690000   |
| 6 | -1.310635000 | 0.183715000  | -0.246719000  |
| 6 | -2.477944000 | 0.283483000  | 0.738355000   |
| 1 | 0.819055000  | 0.187545000  | -0.439150000  |
| 1 | -1.350495000 | 1.045280000  | -0.923822000  |
| 1 | -1.430414000 | -0.720503000 | -0.857143000  |
| 1 | -2.430206000 | 1.212547000  | 1.307076000   |
| 1 | -2.466742000 | -0.548902000 | 1.452240000   |
| 8 | -3.760924000 | 0.320885000  | 0.030121000   |
| 1 | -1.063523000 | -3.728332000 | -10.310170000 |
| 1 | 3.454234000  | 1.587000000  | -3.416582000  |
| 1 | -3.629418000 | 3.310478000  | -3.547975000  |
| 1 | -3.442959000 | 6.593172000  | -0.523272000  |
| 1 | 6.737626000  | 6.602277000  | 1.365524000   |

|   |               |              |              |
|---|---------------|--------------|--------------|
| 1 | 5.268911000   | 6.439634000  | 5.558394000  |
| 1 | -9.362532000  | -1.378770000 | 0.777500000  |
| 1 | -5.007916000  | -3.592967000 | 2.717370000  |
| 1 | -7.680030000  | 0.332404000  | -6.242193000 |
| 1 | -10.086330000 | -0.362803000 | -1.625045000 |
| 1 | -2.571137000  | -4.220070000 | 1.712353000  |
| 1 | -0.241193000  | -3.705333000 | -2.959619000 |
| 1 | -5.214795000  | -0.239900000 | -7.221221000 |
| 1 | -0.938882000  | -2.603369000 | -5.338917000 |
| 6 | 0.384280000   | -1.156130000 | 1.150509000  |
| 6 | 1.031735000   | -2.200204000 | 0.460779000  |
| 6 | -0.018112000  | -1.392009000 | 2.479391000  |
| 6 | 1.261936000   | -3.441333000 | 1.065268000  |
| 1 | 1.362276000   | -2.032470000 | -0.561478000 |
| 6 | 0.212592000   | -2.633326000 | 3.085995000  |
| 1 | -0.477873000  | -0.582793000 | 3.031973000  |
| 6 | 0.847635000   | -3.665159000 | 2.384181000  |
| 1 | 1.773708000   | -4.225205000 | 0.513759000  |
| 1 | -0.100314000  | -2.790894000 | 4.114386000  |
| 1 | 1.029280000   | -4.623947000 | 2.860797000  |
| 1 | -4.015049000  | -0.581733000 | -0.255558000 |

<sup>4</sup>TS<sub>2gamma,DS,S2</sub>

|    |              |              |              |
|----|--------------|--------------|--------------|
| 26 | -4.995139000 | -2.247331000 | -2.233589000 |
| 16 | -6.067573000 | -3.961412000 | -3.357369000 |
| 1  | -6.989790000 | -3.199303000 | -4.049186000 |
| 6  | 5.877090000  | 6.933676000  | 4.069188000  |
| 6  | 6.130446000  | 7.252450000  | 2.571924000  |
| 6  | 4.870566000  | 7.502173000  | 1.709711000  |
| 6  | 3.987556000  | 8.632642000  | 2.273218000  |
| 6  | 5.288344000  | 7.803265000  | 0.256464000  |
| 6  | 5.023068000  | 5.697320000  | 4.297286000  |
| 8  | 3.790775000  | 5.790922000  | 4.554658000  |
| 1  | 5.365137000  | 7.768687000  | 4.552479000  |
| 1  | 6.772711000  | 8.144424000  | 2.528615000  |
| 1  | 6.706939000  | 6.432038000  | 2.120612000  |
| 1  | 4.276517000  | 6.576335000  | 1.698280000  |
| 1  | 3.148509000  | 8.836006000  | 1.597263000  |
| 1  | 3.570584000  | 8.370028000  | 3.250811000  |
| 1  | 4.561704000  | 9.563605000  | 2.377934000  |
| 1  | 4.408574000  | 7.924464000  | -0.385443000 |
| 1  | 5.895952000  | 6.991042000  | -0.160207000 |
| 1  | 5.875662000  | 8.729807000  | 0.201403000  |
| 7  | 5.669081000  | 4.503339000  | 4.196424000  |
| 6  | 5.040848000  | 3.186882000  | 4.357207000  |
| 6  | 5.327627000  | 2.234231000  | 3.172022000  |
| 6  | 4.646839000  | 2.631014000  | 1.876877000  |
| 6  | 3.300423000  | 2.291545000  | 1.652558000  |
| 6  | 2.642429000  | 2.689174000  | 0.483987000  |

|   |              |              |              |
|---|--------------|--------------|--------------|
| 6 | 3.325707000  | 3.437165000  | -0.485851000 |
| 6 | 4.672657000  | 3.762665000  | -0.283451000 |
| 6 | 5.327680000  | 3.361124000  | 0.888365000  |
| 1 | 6.657715000  | 4.518472000  | 3.985663000  |
| 1 | 3.967230000  | 3.355721000  | 4.462109000  |
| 1 | 6.415115000  | 2.165214000  | 3.024931000  |
| 1 | 4.995319000  | 1.233107000  | 3.476719000  |
| 1 | 2.760894000  | 1.707256000  | 2.393879000  |
| 1 | 1.597281000  | 2.433857000  | 0.339932000  |
| 1 | 2.797069000  | 3.774942000  | -1.371217000 |
| 1 | 5.213373000  | 4.328070000  | -1.036698000 |
| 1 | 6.377027000  | 3.608931000  | 1.031818000  |
| 6 | 2.854814000  | -0.001035000 | -4.589911000 |
| 6 | 2.302698000  | 1.144521000  | -3.715054000 |
| 6 | 1.825532000  | 2.374780000  | -4.506052000 |
| 6 | 1.800118000  | -0.669898000 | -5.488185000 |
| 1 | 3.674482000  | 0.386078000  | -5.214428000 |
| 1 | 1.475222000  | 0.758363000  | -3.100732000 |
| 1 | 3.081889000  | 1.457181000  | -3.006264000 |
| 1 | 2.642440000  | 2.789242000  | -5.112412000 |
| 1 | 1.004746000  | 2.122279000  | -5.189280000 |
| 1 | 1.469023000  | 3.162287000  | -3.832385000 |
| 1 | 2.234405000  | -1.500111000 | -6.058858000 |
| 1 | 1.373447000  | 0.037961000  | -6.208066000 |
| 1 | 0.974005000  | -1.071349000 | -4.886402000 |
| 6 | -0.857557000 | 6.445917000  | -0.850429000 |
| 6 | -0.638941000 | 6.210940000  | 0.669864000  |
| 6 | 0.821416000  | 5.849664000  | 0.988843000  |
| 6 | 1.124665000  | 5.586846000  | 2.467873000  |
| 7 | 0.420972000  | 4.389262000  | 2.965959000  |
| 6 | 0.439739000  | 4.016020000  | 4.249932000  |
| 7 | 1.255033000  | 4.646407000  | 5.137658000  |
| 7 | -0.358968000 | 3.018313000  | 4.675164000  |
| 6 | -0.657427000 | 5.171909000  | -1.662039000 |
| 8 | 0.491957000  | 4.840170000  | -2.070856000 |
| 1 | -0.121037000 | 7.170323000  | -1.214057000 |
| 1 | -1.302247000 | 5.409212000  | 1.017832000  |
| 1 | -0.923527000 | 7.125025000  | 1.210610000  |
| 1 | 1.121317000  | 4.981297000  | 0.397371000  |
| 1 | 1.472539000  | 6.674034000  | 0.665713000  |
| 1 | 2.206568000  | 5.456241000  | 2.585578000  |
| 1 | 0.832489000  | 6.450018000  | 3.082693000  |
| 1 | -0.077342000 | 3.771647000  | 2.282669000  |
| 1 | 2.086017000  | 5.165518000  | 4.850460000  |
| 1 | 1.137011000  | 4.479847000  | 6.123550000  |
| 1 | -0.982933000 | 2.488649000  | 4.013186000  |
| 1 | -0.217192000 | 2.628726000  | 5.593753000  |
| 7 | -1.744237000 | 4.387479000  | -1.893720000 |
| 6 | -1.594198000 | 3.071196000  | -2.560224000 |
| 6 | -3.039154000 | 2.556477000  | -2.698566000 |

|   |              |              |              |
|---|--------------|--------------|--------------|
| 6 | -3.792503000 | 3.245009000  | -1.536566000 |
| 6 | -3.128691000 | 4.631027000  | -1.428787000 |
| 1 | -0.975476000 | 2.423530000  | -1.927713000 |
| 1 | -3.465015000 | 2.864189000  | -3.661135000 |
| 1 | -3.097164000 | 1.465719000  | -2.643414000 |
| 1 | -4.871199000 | 3.315964000  | -1.708075000 |
| 1 | -3.630084000 | 2.695796000  | -0.602006000 |
| 1 | -3.141343000 | 5.011349000  | -0.404487000 |
| 1 | -3.630128000 | 5.364649000  | -2.076585000 |
| 6 | -4.217707000 | -4.995262000 | -7.158353000 |
| 6 | -3.240776000 | -4.057279000 | -7.831057000 |
| 6 | -3.693426000 | -2.921060000 | -8.526206000 |
| 6 | -2.790915000 | -2.029408000 | -9.117646000 |
| 6 | -1.411845000 | -2.257833000 | -9.026414000 |
| 6 | -0.946686000 | -3.388755000 | -8.344230000 |
| 6 | -1.853908000 | -4.278701000 | -7.755916000 |
| 1 | -3.791538000 | -5.996789000 | -7.037169000 |
| 1 | -4.493547000 | -4.633854000 | -6.157819000 |
| 1 | -4.761510000 | -2.735784000 | -8.600611000 |
| 1 | -3.163706000 | -1.162465000 | -9.655864000 |
| 1 | -0.710431000 | -1.569780000 | -9.488147000 |
| 1 | 0.120080000  | -3.581986000 | -8.276872000 |
| 1 | -1.485660000 | -5.155711000 | -7.230677000 |
| 6 | -7.081907000 | -2.795999000 | 0.416261000  |
| 6 | -5.888290000 | -3.502015000 | 0.387249000  |
| 6 | -5.481797000 | -4.463688000 | 1.392594000  |
| 6 | -4.255435000 | -4.937555000 | 1.022421000  |
| 6 | -3.900424000 | -4.272813000 | -0.214301000 |
| 7 | -4.905146000 | -3.395149000 | -0.583931000 |
| 6 | -2.734859000 | -4.499535000 | -0.931762000 |
| 6 | -2.415988000 | -3.883988000 | -2.131392000 |
| 6 | -1.222808000 | -4.151967000 | -2.906732000 |
| 6 | -1.288894000 | -3.372710000 | -4.026111000 |
| 6 | -2.522779000 | -2.615463000 | -3.944791000 |
| 7 | -3.198111000 | -2.939873000 | -2.779226000 |
| 6 | -2.943441000 | -1.705594000 | -4.903708000 |
| 6 | -4.117067000 | -0.966894000 | -4.853258000 |
| 6 | -4.529786000 | -0.015155000 | -5.864032000 |
| 6 | -5.730496000 | 0.501173000  | -5.465365000 |
| 6 | -6.070499000 | -0.133454000 | -4.209339000 |
| 7 | -5.067068000 | -1.025766000 | -3.844619000 |
| 6 | -7.234724000 | 0.097067000  | -3.490673000 |
| 6 | -7.569930000 | -0.536862000 | -2.300730000 |
| 6 | -8.796451000 | -0.326471000 | -1.563529000 |
| 6 | -8.752448000 | -1.146199000 | -0.470522000 |
| 6 | -7.497552000 | -1.865223000 | -0.525411000 |
| 7 | -6.782776000 | -1.477218000 | -1.648998000 |
| 1 | -7.751524000 | -2.990964000 | 1.247415000  |
| 1 | -2.027803000 | -5.217258000 | -0.530545000 |
| 1 | -2.306564000 | -1.567643000 | -5.770675000 |



|   |              |              |              |
|---|--------------|--------------|--------------|
| 1 | -7.941545000 | 0.814198000  | -3.894905000 |
| 8 | -1.725274000 | 1.480242000  | 2.949169000  |
| 6 | -1.426760000 | 1.643535000  | 1.709635000  |
| 8 | -0.818199000 | 2.664626000  | 1.216107000  |
| 6 | -1.791859000 | 0.502447000  | 0.714109000  |
| 6 | -3.215458000 | -0.023017000 | 1.001384000  |
| 6 | -3.429531000 | -1.007530000 | 2.078249000  |
| 1 | -1.800729000 | 0.975498000  | -0.272076000 |
| 1 | -3.911581000 | 0.831379000  | 1.066152000  |
| 1 | -3.608180000 | -0.537777000 | -0.145509000 |
| 1 | -3.214266000 | -0.708852000 | 3.101505000  |
| 1 | -3.747107000 | -2.026025000 | 1.885444000  |
| 8 | -4.133143000 | -0.693083000 | -1.291913000 |
| 1 | -5.144182000 | -5.089015000 | -7.735984000 |
| 1 | 3.300976000  | -0.763735000 | -3.935209000 |
| 1 | -1.082136000 | 3.188134000  | -3.518627000 |
| 1 | -1.852251000 | 6.872001000  | -1.020296000 |
| 1 | 6.845567000  | 6.808422000  | 4.572110000  |
| 1 | 5.402718000  | 2.729145000  | 5.288422000  |
| 1 | -9.493448000 | -1.265026000 | 0.306766000  |
| 1 | -6.069805000 | -4.730097000 | 2.258922000  |
| 1 | -6.344559000 | 1.235415000  | -5.967042000 |
| 1 | -9.580264000 | 0.356591000  | -1.857761000 |
| 1 | -3.639177000 | -5.669135000 | 1.524381000  |
| 1 | -0.451016000 | -4.850632000 | -2.618611000 |
| 1 | -3.965139000 | 0.205461000  | -6.758097000 |
| 1 | -0.588999000 | -3.307791000 | -4.846116000 |
| 6 | -0.708875000 | -0.572164000 | 0.710530000  |
| 6 | -0.223472000 | -1.067913000 | -0.510605000 |
| 6 | -0.178635000 | -1.087859000 | 1.907467000  |
| 6 | 0.766868000  | -2.056820000 | -0.539809000 |
| 1 | -0.631344000 | -0.686442000 | -1.441796000 |
| 6 | 0.810702000  | -2.076436000 | 1.878219000  |
| 1 | -0.536653000 | -0.695976000 | 2.852592000  |
| 6 | 1.287898000  | -2.564321000 | 0.655493000  |
| 1 | 1.125323000  | -2.427232000 | -1.494705000 |
| 1 | 1.210969000  | -2.464038000 | 2.810855000  |
| 1 | 2.059552000  | -3.328232000 | 0.634881000  |
| 1 | -4.745662000 | 0.068576000  | -1.386136000 |

<sup>4</sup>Pr<sub>gamma,DS,S2</sub>

|    |              |              |              |
|----|--------------|--------------|--------------|
| 26 | -5.340897000 | -2.244409000 | -2.910815000 |
| 16 | -6.033887000 | -3.322099000 | -5.059864000 |
| 1  | -6.118623000 | -4.626910000 | -4.610925000 |
| 6  | 6.053912000  | 4.745381000  | 0.466892000  |
| 6  | 6.110644000  | 3.247996000  | 0.873947000  |
| 6  | 4.739521000  | 2.573660000  | 1.126103000  |
| 6  | 3.913736000  | 2.436540000  | -0.168333000 |
| 6  | 4.947956000  | 1.191984000  | 1.777488000  |

|   |              |             |              |
|---|--------------|-------------|--------------|
| 6 | 5.554538000  | 5.658130000 | 1.573365000  |
| 8 | 4.384464000  | 6.126748000 | 1.585633000  |
| 1 | 5.388439000  | 4.881450000 | -0.388252000 |
| 1 | 6.630249000  | 2.699689000 | 0.075269000  |
| 1 | 6.735392000  | 3.146656000 | 1.774441000  |
| 1 | 4.173507000  | 3.199367000 | 1.833010000  |
| 1 | 2.924277000  | 2.013420000 | 0.034098000  |
| 1 | 3.757347000  | 3.402194000 | -0.661916000 |
| 1 | 4.423591000  | 1.773865000 | -0.880418000 |
| 1 | 3.988754000  | 0.695755000 | 1.958312000  |
| 1 | 5.481374000  | 1.274384000 | 2.734094000  |
| 1 | 5.536467000  | 0.537612000 | 1.120718000  |
| 7 | 6.452471000  | 5.942531000 | 2.563743000  |
| 6 | 6.180745000  | 6.853245000 | 3.679121000  |
| 6 | 6.274255000  | 6.185083000 | 5.073897000  |
| 6 | 5.123822000  | 5.262371000 | 5.427911000  |
| 6 | 3.998624000  | 5.761071000 | 6.110953000  |
| 6 | 2.939773000  | 4.916508000 | 6.468287000  |
| 6 | 2.988200000  | 3.553440000 | 6.140979000  |
| 6 | 4.097313000  | 3.047427000 | 5.450844000  |
| 6 | 5.155031000  | 3.895387000 | 5.101796000  |
| 1 | 7.385284000  | 5.561403000 | 2.484437000  |
| 1 | 5.182135000  | 7.262661000 | 3.510714000  |
| 1 | 7.225204000  | 5.639189000 | 5.140736000  |
| 1 | 6.330680000  | 6.992589000 | 5.815126000  |
| 1 | 3.962846000  | 6.812073000 | 6.385276000  |
| 1 | 2.093822000  | 5.314914000 | 7.020143000  |
| 1 | 2.184435000  | 2.889484000 | 6.445601000  |
| 1 | 4.145200000  | 1.993785000 | 5.195912000  |
| 1 | 6.018645000  | 3.489271000 | 4.584249000  |
| 6 | 2.057553000  | 1.108218000 | -3.794398000 |
| 6 | 0.715134000  | 1.808172000 | -3.495049000 |
| 6 | 0.614986000  | 3.244658000 | -4.037229000 |
| 6 | 2.347071000  | 0.902890000 | -5.291804000 |
| 1 | 2.873332000  | 1.694472000 | -3.343496000 |
| 1 | -0.101857000 | 1.203497000 | -3.919961000 |
| 1 | 0.556399000  | 1.820392000 | -2.408120000 |
| 1 | 1.431883000  | 3.865964000 | -3.642847000 |
| 1 | 0.679562000  | 3.273833000 | -5.132273000 |
| 1 | -0.331477000 | 3.713022000 | -3.746235000 |
| 1 | 3.281806000  | 0.348914000 | -5.444991000 |
| 1 | 2.439017000  | 1.860087000 | -5.818130000 |
| 1 | 1.538735000  | 0.338393000 | -5.776137000 |
| 6 | -2.301454000 | 6.580373000 | -1.009019000 |
| 6 | -1.069622000 | 6.427888000 | -0.079701000 |
| 6 | 0.171392000  | 5.847420000 | -0.781008000 |
| 6 | 1.320083000  | 5.556501000 | 0.197444000  |
| 7 | 0.960239000  | 4.453692000 | 1.104531000  |
| 6 | 1.230665000  | 4.419665000 | 2.415134000  |
| 7 | 2.084730000  | 5.311739000 | 2.979688000  |

|   |              |              |              |
|---|--------------|--------------|--------------|
| 7 | 0.629898000  | 3.496103000  | 3.191059000  |
| 6 | -2.677685000 | 5.265944000  | -1.680357000 |
| 8 | -2.264635000 | 5.000769000  | -2.842818000 |
| 1 | -2.069976000 | 7.281645000  | -1.816523000 |
| 1 | -1.327277000 | 5.783719000  | 0.770691000  |
| 1 | -0.825562000 | 7.414847000  | 0.339890000  |
| 1 | -0.091008000 | 4.926624000  | -1.314022000 |
| 1 | 0.532901000  | 6.550098000  | -1.543698000 |
| 1 | 2.233943000  | 5.305234000  | -0.353237000 |
| 1 | 1.542049000  | 6.446565000  | 0.795405000  |
| 1 | 0.511414000  | 3.599062000  | 0.689043000  |
| 1 | 2.823608000  | 5.754365000  | 2.434025000  |
| 1 | 2.176247000  | 5.340377000  | 3.983932000  |
| 1 | -0.086487000 | 2.835965000  | 2.800814000  |
| 1 | 0.998822000  | 3.317867000  | 4.112164000  |
| 7 | -3.407065000 | 4.364278000  | -0.967038000 |
| 6 | -3.689746000 | 3.017120000  | -1.524937000 |
| 6 | -4.716007000 | 2.427584000  | -0.543027000 |
| 6 | -4.364798000 | 3.106329000  | 0.800403000  |
| 6 | -3.983904000 | 4.542218000  | 0.386135000  |
| 1 | -2.759455000 | 2.435847000  | -1.550463000 |
| 1 | -5.733103000 | 2.704208000  | -0.850717000 |
| 1 | -4.663739000 | 1.336851000  | -0.509933000 |
| 1 | -5.191011000 | 3.092947000  | 1.518552000  |
| 1 | -3.500950000 | 2.616036000  | 1.265701000  |
| 1 | -3.263341000 | 4.991212000  | 1.074210000  |
| 1 | -4.870184000 | 5.192892000  | 0.344608000  |
| 6 | -2.935578000 | -3.480182000 | -7.796487000 |
| 6 | -2.320686000 | -2.118590000 | -8.031557000 |
| 6 | -3.138204000 | -0.994678000 | -8.256740000 |
| 6 | -2.580478000 | 0.269497000  | -8.473234000 |
| 6 | -1.189114000 | 0.439128000  | -8.465956000 |
| 6 | -0.363654000 | -0.669319000 | -8.244572000 |
| 6 | -0.927356000 | -1.934300000 | -8.030361000 |
| 1 | -2.170976000 | -4.224092000 | -7.549288000 |
| 1 | -3.665208000 | -3.455477000 | -6.977155000 |
| 1 | -4.217715000 | -1.115866000 | -8.251540000 |
| 1 | -3.230570000 | 1.122113000  | -8.647273000 |
| 1 | -0.755515000 | 1.420123000  | -8.633943000 |
| 1 | 0.716267000  | -0.552039000 | -8.246751000 |
| 1 | -0.280292000 | -2.791099000 | -7.861984000 |
| 6 | -7.702486000 | -3.956434000 | -1.065120000 |
| 6 | -6.441869000 | -4.524747000 | -1.188599000 |
| 6 | -6.057881000 | -5.795398000 | -0.619369000 |
| 6 | -4.740340000 | -5.996404000 | -0.929268000 |
| 6 | -4.302286000 | -4.852253000 | -1.693560000 |
| 7 | -5.357563000 | -3.961091000 | -1.852578000 |
| 6 | -3.013621000 | -4.673745000 | -2.176686000 |
| 6 | -2.579957000 | -3.570609000 | -2.897120000 |
| 6 | -1.246068000 | -3.409279000 | -3.436118000 |

|   |               |              |              |
|---|---------------|--------------|--------------|
| 6 | -1.225531000  | -2.221127000 | -4.111896000 |
| 6 | -2.545686000  | -1.640230000 | -3.991259000 |
| 7 | -3.358120000  | -2.472763000 | -3.234867000 |
| 6 | -2.934588000  | -0.444091000 | -4.573176000 |
| 6 | -4.207155000  | 0.101414000  | -4.489314000 |
| 6 | -4.594063000  | 1.364812000  | -5.076413000 |
| 6 | -5.908869000  | 1.568105000  | -4.760129000 |
| 6 | -6.340096000  | 0.431252000  | -3.976825000 |
| 7 | -5.289160000  | -0.461445000 | -3.828811000 |
| 6 | -7.612664000  | 0.282128000  | -3.444082000 |
| 6 | -8.032305000  | -0.788422000 | -2.670184000 |
| 6 | -9.373749000  | -0.961170000 | -2.157471000 |
| 6 | -9.400814000  | -2.153723000 | -1.489611000 |
| 6 | -8.075629000  | -2.725994000 | -1.584861000 |
| 7 | -7.244205000  | -1.868230000 | -2.294078000 |
| 1 | -8.454345000  | -4.523114000 | -0.526206000 |
| 1 | -2.293682000  | -5.461529000 | -1.982108000 |
| 1 | -2.194419000  | 0.099260000  | -5.148945000 |
| 1 | -8.337326000  | 1.060248000  | -3.658945000 |
| 8 | -0.990136000  | 1.605207000  | 2.131722000  |
| 6 | -0.617526000  | 1.296478000  | 0.935008000  |
| 8 | -0.009977000  | 2.089213000  | 0.125978000  |
| 6 | -0.854077000  | -0.155130000 | 0.456367000  |
| 6 | -1.985819000  | -0.827088000 | 1.222371000  |
| 6 | -2.451330000  | -2.063966000 | 0.984405000  |
| 1 | -1.102659000  | -0.099966000 | -0.609615000 |
| 1 | -2.385543000  | -0.231834000 | 2.040724000  |
| 1 | -3.989835000  | -1.279356000 | -0.377774000 |
| 1 | -3.227504000  | -2.504963000 | 1.605621000  |
| 1 | -2.035557000  | -2.705595000 | 0.210718000  |
| 8 | -4.803115000  | -1.105943000 | -0.903990000 |
| 1 | -3.468813000  | -3.833672000 | -8.688962000 |
| 1 | 2.069685000   | 0.132646000  | -3.286551000 |
| 1 | -4.058342000  | 3.101178000  | -2.549582000 |
| 1 | -3.141965000  | 6.991953000  | -0.436571000 |
| 1 | 7.056700000   | 5.069605000  | 0.156819000  |
| 1 | 6.896842000   | 7.684290000  | 3.636970000  |
| 1 | -10.235344000 | -2.618871000 | -0.984956000 |
| 1 | -6.717739000  | -6.438952000 | -0.055431000 |
| 1 | -6.537847000  | 2.406344000  | -5.022781000 |
| 1 | -10.182287000 | -0.260142000 | -2.306424000 |
| 1 | -4.112475000  | -6.836050000 | -0.667915000 |
| 1 | -0.445811000  | -4.124985000 | -3.315234000 |
| 1 | -3.933090000  | 2.002045000  | -5.644784000 |
| 1 | -0.412370000  | -1.774173000 | -4.664251000 |
| 6 | 0.454526000   | -0.944346000 | 0.588532000  |
| 6 | 1.039578000   | -1.558535000 | -0.528583000 |
| 6 | 1.073134000   | -1.086305000 | 1.844135000  |
| 6 | 2.217269000   | -2.306263000 | -0.395757000 |
| 1 | 0.569424000   | -1.457259000 | -1.501924000 |

|   |              |              |              |
|---|--------------|--------------|--------------|
| 6 | 2.246852000  | -1.833757000 | 1.976824000  |
| 1 | 0.625491000  | -0.605608000 | 2.708549000  |
| 6 | 2.823688000  | -2.448279000 | 0.856263000  |
| 1 | 2.657241000  | -2.776083000 | -1.270454000 |
| 1 | 2.709304000  | -1.943343000 | 2.953748000  |
| 1 | 3.733681000  | -3.031354000 | 0.960636000  |
| 1 | -5.597765000 | -1.131262000 | -0.340393000 |

#### Full Substrate (S2)

|   |              |              |              |
|---|--------------|--------------|--------------|
| 8 | -0.476034000 | 1.184052000  | 1.978995000  |
| 6 | -0.659509000 | 1.118825000  | 0.703472000  |
| 8 | -0.986334000 | 2.061519000  | -0.091517000 |
| 6 | -0.584712000 | -0.305297000 | 0.033564000  |
| 6 | -1.958751000 | -1.025274000 | 0.242653000  |
| 6 | -2.298743000 | -1.369272000 | 1.701686000  |
| 1 | -0.508365000 | -0.109692000 | -1.043693000 |
| 1 | -2.726018000 | -0.351826000 | -0.164596000 |
| 1 | -1.976396000 | -1.943707000 | -0.367825000 |
| 1 | -2.193779000 | -0.475438000 | 2.323768000  |
| 1 | -1.615376000 | -2.130781000 | 2.097674000  |
| 6 | 0.586285000  | -1.192315000 | 0.424224000  |
| 6 | 1.154534000  | -2.050878000 | -0.539041000 |
| 6 | 1.131367000  | -1.213163000 | 1.725472000  |
| 6 | 2.217432000  | -2.905583000 | -0.223985000 |
| 1 | 0.755704000  | -2.040525000 | -1.551534000 |
| 6 | 2.195444000  | -2.065625000 | 2.040519000  |
| 1 | 0.714494000  | -0.507939000 | 2.438102000  |
| 6 | 2.742972000  | -2.919910000 | 1.073619000  |
| 1 | 2.636777000  | -3.554226000 | -0.990403000 |
| 1 | 2.604553000  | -2.059392000 | 3.048706000  |
| 1 | 3.570046000  | -3.580177000 | 1.324913000  |
| 1 | -3.323793000 | -1.758167000 | 1.783801000  |

#### Substrate\_S2\_C2\_alpha (Phenyl\_Butanoic\_acid\_non\_fix remove\_alpha)

|   |              |              |              |
|---|--------------|--------------|--------------|
| 8 | -1.946550000 | 1.368174000  | 1.689646000  |
| 6 | -0.725201000 | 0.991846000  | 1.515082000  |
| 8 | 0.328266000  | 1.633643000  | 1.885968000  |
| 6 | -0.573404000 | -0.344848000 | 0.794463000  |
| 6 | -1.829267000 | -0.841436000 | 0.112909000  |
| 6 | -2.734571000 | -1.680165000 | 1.049615000  |
| 1 | -2.402780000 | 0.042101000  | -0.181943000 |
| 1 | -1.592609000 | -1.421265000 | -0.791642000 |
| 1 | -3.020094000 | -1.047696000 | 1.894977000  |
| 1 | -2.212683000 | -2.568168000 | 1.428970000  |
| 6 | 0.618316000  | -1.155322000 | 0.808962000  |

|   |              |              |              |
|---|--------------|--------------|--------------|
| 6 | 0.636493000  | -2.477848000 | 0.259585000  |
| 6 | 1.848704000  | -0.688624000 | 1.377453000  |
| 6 | 1.786037000  | -3.265876000 | 0.277531000  |
| 1 | -0.268761000 | -2.888627000 | -0.173453000 |
| 6 | 2.987365000  | -1.487853000 | 1.389893000  |
| 1 | 1.831704000  | 0.319010000  | 1.780980000  |
| 6 | 2.976388000  | -2.782757000 | 0.841587000  |
| 1 | 1.754748000  | -4.267089000 | -0.148136000 |
| 1 | 3.903737000  | -1.098426000 | 1.829136000  |
| 1 | 3.872340000  | -3.398755000 | 0.853162000  |
| 1 | -3.644878000 | -2.011803000 | 0.529175000  |

Substrate\_S2\_C3\_beta (Phenyl\_Butanoic\_acid\_non\_fix remove\_beta)

|   |              |              |              |
|---|--------------|--------------|--------------|
| 8 | -0.542710000 | 1.219052000  | 1.976886000  |
| 6 | -0.564580000 | 1.174603000  | 0.693870000  |
| 8 | -0.598865000 | 2.125583000  | -0.147451000 |
| 6 | -0.623025000 | -0.306955000 | 0.037819000  |
| 6 | -1.958355000 | -0.919727000 | 0.348977000  |
| 6 | -2.295016000 | -1.413393000 | 1.722989000  |
| 1 | -0.567326000 | -0.120825000 | -1.040197000 |
| 1 | -2.783848000 | -0.599715000 | -0.288410000 |
| 1 | -2.196160000 | -0.588981000 | 2.450075000  |
| 1 | -1.603029000 | -2.200912000 | 2.057924000  |
| 6 | 0.557915000  | -1.189670000 | 0.426704000  |
| 6 | 1.124852000  | -2.050146000 | -0.534343000 |
| 6 | 1.111137000  | -1.195217000 | 1.723226000  |
| 6 | 2.201341000  | -2.887853000 | -0.221228000 |
| 1 | 0.710549000  | -2.058019000 | -1.539873000 |
| 6 | 2.186490000  | -2.034258000 | 2.038035000  |
| 1 | 0.694368000  | -0.496158000 | 2.441329000  |
| 6 | 2.737620000  | -2.886870000 | 1.072421000  |
| 1 | 2.621334000  | -3.538361000 | -0.985625000 |
| 1 | 2.601372000  | -2.016775000 | 3.043611000  |

|   |              |              |             |
|---|--------------|--------------|-------------|
| 1 | 3.574240000  | -3.535659000 | 1.321586000 |
| 1 | -3.316408000 | -1.813624000 | 1.773601000 |

Substrate\_S2\_C4\_beta (Phenyl\_Butanoic\_acid\_non\_fix remove\_gamma)

|   |              |              |              |
|---|--------------|--------------|--------------|
| 8 | -0.374974000 | 1.220437000  | 1.926280000  |
| 6 | -0.636874000 | 1.113499000  | 0.668929000  |
| 8 | -1.044523000 | 2.020215000  | -0.130768000 |
| 6 | -0.559106000 | -0.327027000 | 0.030206000  |
| 6 | -1.918507000 | -1.058825000 | 0.314302000  |
| 6 | -2.226434000 | -1.271976000 | 1.760708000  |
| 1 | -0.526152000 | -0.158886000 | -1.053226000 |
| 1 | -2.695097000 | -0.423330000 | -0.154405000 |
| 1 | -1.937024000 | -2.018515000 | -0.228794000 |
| 1 | -1.894887000 | -0.531749000 | 2.480875000  |
| 1 | -2.828313000 | -2.117540000 | 2.086096000  |
| 6 | 0.630934000  | -1.190083000 | 0.407490000  |
| 6 | 1.221547000  | -2.018751000 | -0.567389000 |
| 6 | 1.166096000  | -1.225179000 | 1.712010000  |
| 6 | 2.297343000  | -2.860727000 | -0.260563000 |
| 1 | 0.828873000  | -1.997500000 | -1.582176000 |
| 6 | 2.242742000  | -2.064303000 | 2.019136000  |
| 1 | 0.740500000  | -0.537597000 | 2.434736000  |
| 6 | 2.812574000  | -2.890710000 | 1.040646000  |
| 1 | 2.733271000  | -3.487481000 | -1.035863000 |
| 1 | 2.644650000  | -2.069293000 | 3.030187000  |
| 1 | 3.648951000  | -3.541302000 | 1.286356000  |
